# Supplementary material
Source: publisher site journal article supplement (https://jhr.pensoft.net/article/84139/download/suppl/31/)
Supplement: Supplementary file 1

**Supplemental Material 1.** MAFFT nucleotide alignment of 250 best BLASTn hits with CO1 barcodes generated as part of this study (untrimmed)

>AF433666.1:10-458 Microctonus aethiopoides cytochrome oxidase subunit I gene, partial cds; mitochondrial gene for mitochondrial product

GGAAATTGATTAGTTCCTTTAATATTAGGAGCTCCTGATATAGCTTTCCCTCGTATAAATAATATAAGATTTTGATTACT

TCCACCTTCTTTATTTTTATTAATAATTAGGAGATTTATAAATATTGGGACAGGGACTGGTTGGACAGTATACCCTCCTT

TATCTTTAAATGTAAGTCATAGGGGAATATCTGTTGATATAAGAATTTTTTCTTTACATTTAGCAGGGATTTCTTCTATT

ATGGGAGCAATTAATTTTATTTCTACTATTATAAATATACGTTTAATAGGTTTAATAATAAATAATATTTCTTTATTTGT

ATGATCTGTGTTAATTACTGCTGTATTATTATTATTATCATTACCAGTATTGGCTGGTGCTATTACAATATTATTAA-GA

GATCGTAATTTAAATACAACATTTTTTGATCCGGCAGGA-GGGGGGGATCC-----------------------------

-----------

>AF433667.1:10-458 Microctonus aethiopoides from USA cytochrome oxidase subunit I gene, partial cds; mitochondrial gene for mitochondrial product

GGAAATTGATTAGTTCCTTTAATATTAGGAGCTCCTGATATAGCTTTCCCTCGTATAAATAATATAAGATTTTGATTACT

TCCACCTTCTTTATTTTTATTAATAATTAGGAGATTTATAAATATTGGGACAGGGACTGGTTGGACAGTATACCCTCCTT

TATCTTTAAATGTAAGTCATAGGGGAATATCTGTTGATATAAGAATTTTTTCTTTACATTTAGCAGGGATTTCTTCTATT

ATGGGAGCAATTAATTTTATTTCTACTATTATAAATATACGTTTAATAGGTTTAATAATAAATAATATTTCTTTATTTGT

ATGATCTGTGTTAATTACTGCTGTATTATTATTATTATCATTACCAGTATTGGCTGGAGCTATTACAATATTATTAA-GA

GATCGTAATTTAAATACAACATTTTTTGATCCGGCAGGA-GGGGGGGATCC-----------------------------

-----------

>AY039697.2:1-465 Microctonus aethiopoides isolate 97 cytochrome oxidase subunit I (COI) mRNA, partial cds; mitochondrial gene for mitochondrial product

-----------------TTTAATATTAGGAGCTCCTGATATAGCTTTCCCTCGTATAAATAATATAAGATTTTGATTACT

TCCACCTTCTTTATTTTTATTAATAATTAGGAGATTTATAAATATTGGGACAGGGACTGGTTGGACAGTATACCCTCCTT

TATCTTTAAATGTAAGTCATAGGGGAATATCTGTTGATATAAGAATTTTTTCTTTACATTTAGCAGGGATTTCTTCTATT

ATGGGAGCAATTAATTTTATTTCTACTATTATAAATATACGTTTAATAGGTTTAATAATAAATAATATTTCTTTATTTGT

ATGATCTGTGTTAATTACTGCTGTATTATTATTATTATCATTACCAGTATTGGCTGGAGCTATTACAATATTATTAA-GA

GATCGTAATTTAAATACAACATTTTTTGATCCGGCAGGA-GGGGGGGATCCAGTTTTATATCAACATTTATTTTGATTTT

TTGG-------

>AY039699.2:1-465 Microctonus aethiopoides isolate S cytochrome oxidase subunit I (COI) mRNA, partial cds; mitochondrial gene for mitochondrial product

-----------------TTTAATATTAGGAGCCCCTGATATAGCTTTTCCTCGTATAAATAATATAAGATTTTGATTACT

TCCACCTTCTTTATTTTTATTAATAATTAGGAGATTTATAAATATTGGGACAGGGACTGGTTGGACAGTATACCCTCCTT

TATCTTTAAATGTAAGTCATAGGGGAATATCTGTTGATATAAGAATTTTTTCTTTACATTTAGCAGGGATTTCTTCTATT

ATGGGAGCAATTAATTTTATTTCTACTATTATAAATATACGTTTAATAGGTTTAATAATAAATAATATTTCTTTATTTGT

ATGATCTGTGTTAATTACTGCTGTATTATTATTATTATCATTACCAGTATTGGCTGGTGCTATTACAATATTATTAA-GA

GATCGTAATTTAAATACAACATTTTTTGATCCGGCAGGA-GGGGGGGATCCAGTTTTATATCAACATTTATTTTGATTTT

TTGG-------

>AY039700.2:1-465 Microctonus aethiopoides isolate P cytochrome oxidase subunit I (COI) mRNA, partial cds; mitochondrial gene for mitochondrial product

-----------------TTTAATATTAGGAGCCCCTGATATAGCTTTCCCTCGTATAAATAATATAAGATTTTGATTACT

TCCCCCTTCTTTATTTTTATTAATAATTAGGAGATTTATAAATATTGGGACAGGGACTGGTTGGACAGTATACCCTCCTT

TATCTTTAAATGTAAGTCATAGGGGAATATCTGTTGATATAAGAATTTTTTCTTTACATTTAGCAGGGATTTCTTCTATT

ATGGGAGCAATTAATTTTATTTCTACTATTATAAATATACGTTTAATAGGTTTAATAATAAATAATATTTCTTTATTTGT

ATGATCTGTGTTAATTACTGCTGTATTATTATTATTATCATTACCAGTATTGGCTGGTGTTATTACAATATTATTAA-GA

GATCGTAATTTAAATACAACATTTTTTGATCCGGCAGGA-GGGGGGGATCCAGTTTTATATCAACATTTATTTTGATTTT

TTGG-------

>EU078338.1:1-465 Microctonus aethiopoides isolate HY8c cytochrome oxidase subunit 1 (COI) gene, partial cds; mitochondrial

-----------------TTTAATATTAGGAGCTCCTGATATAGCTTTCCCTCGTATAAATAATATAAGATTTTGATTACT

CCCACCTTCTTTATTTTTATTAATAATTAGGAGATTTATAAATATTGGGACAGGGACTGGTTGGACAGTATACCCTCCCC

TATCTTTAAATGTAAGTCATAGGGGAATATCTGTTGATATAAGAATTTTTTCTTTACATTTAGCAGGGATTTCTTCTATT

ATGGGAGCAATTAATTTTATTTCTACTATTATAAATATACGTTTAATAGGTTTAATAATAAATAATATTTCTTTATTTGT

ATGATCTGTGTTAATTACTGCTGTATTATTATTATTATCATTACCAGTATTGGCTGGTGCTATTACAATATTATTAA-GA

GATCGTAATTTAAATACAACATTTTTTGATCCGGCAGGA-GGGGGGGATCCAGTTTTATATCAACATTTATTTTGATTTT

TTGG-------

>EU078335.1:188-669 Microctonus aethiopoides isolate HY9c cytochrome oxidase subunit 1 (COI) gene, partial cds; mitochondrial

GGTAATTGATTAATTCCTTTAATATTAGGAGCTCCTGATATAGCTTTCCCTCGTATAAATAATATAAGATTTTGATTACT

TCCACCTTCTTTATTTTTATTAATAATTAGGAGATTTATAAATATTGGGACAGGGACTGGTTGGACAGTATACCCTCCTT

TATCTTTAAATGTAAGTCATAGGGGAATATCTGTTGATATAAGAATTTTTTCTTTACATTTAGCAGGGATTTCTTCTATT

ATGGGAGCAATTAATTTTATTTCTACTATTATAAATATACGTTTAATAGGTTTAATAATAAATAATATTTCTTTATTTGT

ATGATCTGTGTTAATTACTGCTGTATTATTATTATTATCATTACCAGTATTGGCTGGAGCTATTACAATATTATTAA-GA

GATCGTAATTTAAATACAACATTTTTTGATCCGGCAGGA-GGGGGGGATCCAGTTTTATATCAACATTTATTTTGATTTT

TTGG-------

>EU078336.1:188-669 Microctonus aethiopoides isolate HY6a cytochrome oxidase subunit 1 (COI) gene, partial cds; mitochondrial

GGTAATTGATTAATTCCTTTAATATTAGGAGCTCCTGATATAGCTTTCCCTCGTATAAATAATATAAGATTTTGATTACT

TCCACCTTCTTTATTTTTATTAATAATTAGGAGATTTATAAATATTGGGACAGGGACTGGTTGGACAGTATACCCTCCTT

TATCTTTAAATGTAAGTCATAGGGGAATATCTGTTGATATAAGAATTTTTTCTTTACATTTAGCAGGGATTTCTTCTATT

ATGGGAGCAATTAATTTTATTTCTACTATTATAAATATACGTTTAATAGGTTTAATAATAAATAATATTTCTTTATTTGT

ATGATCTGTGTTAATTACTGCTGTATTATTATTATTATCATTACCAGTATTGGCTGGTGCTATTACAATATTATTAA-GA

GATCGTAATTTAAATACAACATTTTTTGATCCGGCAGGA-GGGGGGGATCCAGTTTTATATCAACATTTATTTTGATTTT

TTGG-------

>EU078337.1:188-669 Microctonus aethiopoides isolate HY7a cytochrome oxidase subunit 1 (COI) gene, partial cds; mitochondrial

GGTAATTGATTAATTCCTTTAATATTAGGAGCTCCTGATATAGCTTTCCCTCGTATAAATAATATAAGATTTTGATTACT

CCCACCTTCTTTATTTTTATTAATAATTAGGAGATTTATAAATATTGGGACAGGGACTGGTTGGACAGTATACCCTCCCC

TATCTTTAAATGTAAGTCATAGGGGAATATCTGTTGATATAAGAATTTTTTCTTTACATTTAGCAGGGATTTCTTCTATT

ATGGGAGCAATTAATTTTATTTCTACTATTATAAATATACGTTTAATAGGTTTAATAATAAATAATATTTCTTTATTTGT

ATGATCTGTGTTAATTACTGCTGTATTATTATTATTATCATTACCAGTATTGGCTGGTGCTATTACAATATTATTAA-GA

GATCGTAATTTAAATACAACATTTTTTGATCCGGCAGGA-GGGGGGGATCCAGTTTTATATCAACATTTATTTTGATTTT

TTGG-------

>HM432835.1:188-658 Microctonus sp. TTHYW1004-09 voucher BIOUG<CAN>:08BBHYM-0875 cytochrome oxidase subunit 1 (COI) gene, partial cds; mitochondrial

GGTAATTGATTAATTCCTTTAATATTAGGAGCTCCTGATATAGCTTTCCCTCGTATAAATAATATAAGATTTTGATTACT

TCCACCTTCTTTATTTTTATTAATAATTAGGAGATTTATAAATATTGGGACAGGGACTGGTTGGACAGTATACCCTCCTT

TATCTTTAAATGTAAGTCATAGGGGAATATCTGTTGATATAAGAATTTTTTCTTTACATTTAGCAGGGATTTCTTCTATT

ATGGGAGCAATTAATTTTATTTCTACTATTATAAATATACGTTTAATAGGTTTAATAATAAATAATATTTCTTTATTTGT

ATGATCTGTGTTAATTACTGCTGTATTATTATTATTATCATTACCAGTATTGGCTGGAGCTATTACAATATTATTAA-GA

GATCGTAATTTAAATACAACATTTTTTGATCCGGCAGGA-GGGGGGGATCCAGTTTTATATCAACATTTATTT-------

-----------

>JN980118.1:188-669 Microctonus aethiopoides isolate 10072 cytochrome c oxidase subunit 1 (COI) gene, partial cds; mitochondrial

GGTAATTGATTAATTCCTTTAATATTAGGGGCTCCTGATATAGCTTTCCCTCGAATAAATAATATAAGATTTTGATTACT

CCCACCTTCTTTATTTTTACTAATAATTAGGAGATTTATAAATATTGGGACAGGGACTGGTTGGACAGTATACCCTCCTT

TATCTTTAAATGTAAGTCATAGGGGAATATCAGTTGATATGAGAATTTTTTCTTTACATTTAGCAGGGATTTCTTCTATT

ATAGGGGCAATTAATTTTATTTCTACTATTAAAAATATACGTTTAATAGGTTTAATAATAAATAATATTTCTTTATTTAT

ATGGTCTGTATTAATTACTGCTGTATTATTATTATTATCATTACCAGTATTAGCTGGCGCTATTACAATATTATTAA-GA

GACCGTAATTTAAATACAACATTTTTTGATCCAGCAGGA-GGGGGGGATCCAGTTTTATATCAACATTTATTTTGATTTT

TTGG-------

>JN980119.1:185-666 Microctonus aethiopoides isolate 10073 cytochrome c oxidase subunit 1 (COI) gene, partial cds; mitochondrial

GGTAATTGATTAATTCCTTTAATATTAGGGGCTCCTGATATAGCTTTCCCTCGAATAAATAATATAAGATTTTGATTACT

CCCACCTTCTTTATTTTTACTAATAATTAGGAGATTTATAAATATTGGGATAGGGACTGGTTGGACAGTATACCCTCCTT

TATCTTTAAATGTAAGTCATAGGGGAATATCAGTTGATATGAGAATTTTTTCTTTACATTTAGCAGGGATTTCTTCTATT

ATAGGGGCAATTAATTTTATTTCTACTATTAAAAATATACGTTTAATAGGTTTAATAATAAATAATATTTCTTTATTTAT

ATGGTCTGTATTAATTACTGCTGTATTATTATTATTATCATTACCAGTATTAGCTGGCGCTATTACAATATTATTAA-GA

GACCGTAATTTAAATACAACATTTTTTGATCCAGCAGGA-GGGGGGGATCCAGTTTTATATCAACATTTATTTTGATTTT

TTGG-------

>JN980116.1:178-659 Microctonus aethiopoides isolate 10068 cytochrome c oxidase subunit 1 (COI) gene, partial cds; mitochondrial

GGTAATTGATTAATTCCTTTAATATTAGGTGCTCCTGATATAGCTTTCCCTCGTATAAATAACATAAGATTTTGATTACT

CCCTCCATCTTTATTTTTATTAATAATTAGAAGATTTATAAATATTGGTACAGGAACTGGTTGAACTGTATATCCTCCTT

TATCATTAAATGTTAGTCATAATGGAATGTCTGTTGATTTGAGAATTTTTTCTTTACATTTAGCAGGAATTTCTTCAATT

ATAGGGGCAATTAATTTTATTTCTACTATTATAAATATACGTTTAATAGGTTTAATAATAAATAATATTTCTTTATTTGT

ATGATCTGTATTAATTACAGCAGTTTTATTATTATTATCTTTACCAGTATTGGCTGGTGCTATTACTATATTATTAA-GA

GATCGTAATTTAAATACAACATTTTTTGACCCGGCAGGT-GGGGGAGACCCCGTTTTATATCAACATTTATTTTGATTTT

TTGG-------

>JN980117.1:188-669 Microctonus aethiopoides isolate 10069 cytochrome c oxidase subunit 1 (COI) gene, partial cds; mitochondrial

GGTAATTGATTAATTCCTTTAATATTAGGTGCTCCTGATATAGCTTTCCCTCGTATAAATAACATAAGATTTTGATTACT

CCCTCCATCTTTATTTTTATTAATAATTAGAAGATTTATAAATATTGGTACAGGAACTGGTTGAACTGTATATCCTCCTT

TATCATTAAATGTTAGTCATAATGGAATGTCTGTTGATTTGAGAATTTTTTCTTTACATTTAGCAGGAATTTCTTCAATT

ATAGGGGCAATTAATTTTATTTCTACTATTATAAATATACGTTTAATAGGTTTAATAATAAATAATATTTCTTTATTTGT

ATGATCTGTATTAATTACAGCAGTTTTATTATTATTATCTTTACCAGTATTGGCTGGTGCTATTACTATACTATTAA-GA

GATCGTAATTTAAATACAACATTTTTTGACCCGGCAGGT-GGGGGAGACCCCGTTTTATATCAACATTTATTTTGATTTT

TTGG-------

>KY845609.1:188-658 Microctonus aethiopoides voucher BIOUG02399-F11 cytochrome oxidase subunit 1 (COI) gene, partial cds; mitochondrial

GGTAATTGATTAATTCCTTTAATATTAGGTGCTCCTGATATAGCTTTCCCTCGTATAAATAACATAAGATTTTGATTACT

CCCTCCATCTTTATTTTTATTAATAATTAGAAGATTTATAAATATTGGTACAGGAACTGGTTGAACTGTATATCCTCCTT

TATCATTAAATGTTAGTCATAATGGAATGTCTGTTGATTTGAGAATTTTTTCTTTACATTTAGCAGGAATTTCTTCAATT

ATAGGGGCAATTAATTTTATTTCTACTATTATAAATATACGTTTAATAGGTTTAATAATAAATAATATTTCTTTATTTGT

ATGATCTGTATTAATTACAGCAGTTTTATTATTATTATCTTTACCAGTATTGGCTGGTGCTATTACTATATTATTAA-GA

GATCGTAATTTAAATACAACATTTTTTGATCCGGCAGGT-GGGGGAGACCCCGTTTTATATCAACATTTATTT-------

-----------

>AY039687.2:2-467 Microctonus aethiopoides isolate 7 cytochrome oxidase subunit I (COI) mRNA, partial cds; mitochondrial gene for mitochondrial product

------------------TTAATATTAGGAGCTCCTGACATAGTTTTTCCACGTATAAATAATATAAGATTTTGATTACT

CCCCCCGTCATTATTTTTACTTATAACTAGAAGATTTATAAATATTGGGGTAGGGACTGGTTGGACAGTTTATCCTCCTT

TGTCTTTAAATGTTAGTCATAGTGGAATATCTGTTGATATAAGAATTTTTTCTTTACATCTGGCAGGAATTTCTTCTATT

ATAGGGGCAATTAATTTTATTTCTACTATTATAAATATACGTTTAATAGGTTTAATAATAAATAATATTTCTTTATTTGT

ATGATCAGTATTAATTACTGCTGTATTATTATTATTATCTTTACCAGTATTAGCAGGTGCAATTACTATATTATTAA-GA

GATCGTAATTTAAATACAACGTTCTTTGATCCTGCGGGA-GGGGGGGATCCTGTTTTATATCAACATCTATTTTGATTTT

TTGGGC-----

>AY039689.2:2-467 Microctonus aethiopoides isolate 27 cytochrome oxidase subunit I (COI) mRNA, partial cds; mitochondrial gene for mitochondrial product

------------------TTAATATTAGGAGCTCCTGACATAGTTTTTCCACGTATAAATAATATAAGATTTTGATTACT

CCCCCCGTCATTATTTTTACTTATAACCAGAAGATTTATAAATATTGGGGTAGGGACTGGTTGGACAGTTTATCCTCCTT

TGTCTTTAAATGTTAGTCATAGTGGAATATCTGTTGATATAAGAATTTTTTCTTTACATCTGGCAGGAATTTCTTCTATT

ATAGGGGCAATTAATTTTATTTCTACTATTATAAATATACGTTTAATAGGTTTAATAATAAATAATATTTCTTTATTTGT

ATGATCAGTATTAATTACTGCTGTATTATTATTATTATCTTTACCAGTATTAGCAGGTGCAATTACTATATTATTAA-GA

GATCGTAATTTAAATACAACGTTCTTTGATCCTGCGGGA-GGGGGGGATCCTGTTTTATATCAACATCTATTTTGATTTT

TTGGGC-----

>EU078345.1:2-467 Microctonus aethiopoides isolate SI5b2 cytochrome oxidase subunit 1 (COI) gene, partial cds; mitochondrial

------------------TTAATATTAGGAGCTCCTGACATAGTTTTTCCACGTATAAATAATATAAGATTTTGATTACT

CCCCCCGTCATTATTTTTACTTATAACTAGAAGATTTATAAATATTGGGGTAGGGACTGGTTGGACAGTTTATCCTCCTT

TGTCTTTAAATGTTAGTCATAGTGGAATATCTGTTGATATAAGAATTTTTTCTTTACATCTGGCAGGAATTTCTTCTATT

ATAGGGGCAATTAATTTTATTTCTACTATTATAAATATACGTTTAATAGGTTTAATAATAAATAATATTTCTTTATTTGT

ATGATCAGTATTAATTACTGCTGTATTATTATTATTATCTTTACCAGTATTAGCAGGTGCAATTACTATATTATTAA-GA

GATCGTAATTTAAATACAACGTTTTTTGATCCTGCGGGA-GGGGGGGATCCTGTTTTATATCAACATCTATTTTGATTTT

TTGGGC-----

>EU078350.1:2-467 Microctonus aethiopoides isolate SI5 cytochrome oxidase subunit 1 (COI) gene, partial cds; mitochondrial

------------------TTAATATTAGGAGCTCCTGACATAGTTTTTCCACGTATAAATAATATAAGATTTTGATTACT

CCCCCCGTCATTATTTTTACTTATAACTAGAAGATTTATAAATATTGGGGTAGGGACTGGTTGGACAGTTTATCCTCCTT

TGTCTTTAAATGTTAGTCATAGTGGAATATCTGTTGATATAAGAATTTTTTCTTTACATCTGGCAGGAATTTCTTCTATT

ATAGGGGCAATTAATTTTATCTCTACTATTATAAATATACGTTTAATAGGTTTAATAATAAATAATATTTCTTTATTTGT

ATGATCAGTATTAATTACTGCTGTATTATTATTATTATCTTTACCAGTATTAGCAGGTGCAATTACTATATTATTAA-GA

GATCGTAATTTAAATACAACGTTCTTTGATCCTGCGGGA-GGGGGGGATCCTGTTTTATATCAACATCTATTTTGATTTT

TTGGGC-----

>EU078352.1:2-467 Microctonus aethiopoides isolate SI9b2 cytochrome oxidase subunit 1 (COI) gene, partial cds; mitochondrial

------------------TTAATATTAGGAGCTCCTGACATAGTTTTTCCACGTATAAATAATATAAGATTTTGATTACT

CCCCCCGTCATTATTTTTACTTATAACTAGAAGATTTATAAATATTGGTGTAGGGACTGGTTGGACAGTTTATCCTCCTT

TGTCTTTAAATGTTAGTCATAGTGGAATATCTGTTGATATAAGAATTTTTTCTTTACATCTGGCAGGAATTTCTTCTATT

ATAGGGGCAATTAATTTTATCTCTACTATTATAAATATACGTTTAATAGGTTTAATAATAAATAATATTTCTTTATTTGT

ATGATCAGTATTAATTACTGCTGTATTATTATTATTATCTTTACCAGTATTAGCAGGTGCAATTACTATATTATTAA-GA

GATCGTAATTTAAATACAACGTTCTTTGATCCTGCGGGA-GGGGGGGATCCTGTTTTATATCAACATCTATTTTGATTTT

TTGGGC-----

>AY039688.2:5-488 Microctonus aethiopoides isolate 10 cytochrome oxidase subunit I (COI) mRNA, partial cds; mitochondrial gene for mitochondrial product

GGAAATTGGTTAATTCCCTTAATATTAGGAGCTCCTGACATAGTTTTTCCACGTATAAATAATATAAGATTTTGATTACT

CCCCCCGTCATTATTTTTACTCATAACTAGAAGATTTATAAATATTGGGGTAGGGACTGGTTGGACAGTTTATCCTCCTT

TGTCTTTAAATGTTAGTCATAGTGGAATATCTGTTGATATAAGAATTTTTTCTTTACATCTGGCAGGAATTTCTTCTATT

ATAGGGGCAATTAATTTTATTTCTACTATTATAAATATACGTTTAATAGGTTTAATAATAAATAATATTTCTTTATTTGT

ATGATCAGTATTAATTACTGCTGTATTATTATTATTATCTTTACCAGTATTAGCAGGTGCAATTACTATATTATTAA-GA

GATCGTAATTTAAATACAACGTTCTTTGATCCTGCGGGA-GGGGGGGATCCTGTTTTATATCAACATCTATTTTGATTTT

TTGGGC-----

>DQ525079.1:188-671 Microctonus aethiopoides haplotype 3 cytochrome oxidase subunit 1 (COI) gene, partial cds; mitochondrial

GGTAATTGGTTAATTCCCTTAATATTAGGAGCTCCTGACATAGTTTTTCCACGTATAAATAATATAAGATTTTGATTACT

CCCCCCGTCATTATTTTTACTTATAACCAGAAGATTTATAAATATTGGGGTAGGGACTGGTTGGACAGTTTATCCTCCTT

TGTCTTTAAATGTTAGTCATAGTGGAATATCTGTTGATATAAGAATTTTTTCTTTACATCTGGCAGGAATTTCTTCTATT

ATAGGGGCAATTAATTTTATTTCTACTATTATAAATATACGTTTAATAGGTTTAATAATAAATAATATTTCTTTATTTGT

ATGATCAGTATTAATTACTGCTGTATTATTATTATTATCTTTACCAGTATTAGCAGGTGCAATTACTATATTATTAA-GA

GATCGTAATTTAAATACAACGTTCTTTGATCCTGCGGGA-GGGGGGGATCCTGTTTTATATCAACATCTATTTTGATTTT

TTGGGC-----

>DQ525080.1:188-671 Microctonus aethiopoides haplotype 15 cytochrome oxidase subunit 1 (COI) gene, partial cds; mitochondrial

GGTAATTGGTTAATTCCCTTAATATTAGGAGCTCCTGACATAGTTTTTCCACGTATAAATAATATAAGATTTTGATTACT

CCCCCCGTCATTATTTTTACTTATAACCAGAAGATTTATAAATATTGGGGTAGGGACTGGTTGGACAGTTTATCCTCCTT

TGTCTTTAAATGTTAGTCATAGTGGAATATCTGTTGATATAAGAATTTTTTCTTTACATCTGGCAGGAATTTCTTCTATT

ATAGGGGCAATTAATTTTATTTCTACTATTATAAATATACGTTTAATAGGTTTAATAATAAATAATATTTCTTTATTTGT

ATGATCAGTATTAATTACTGCTGTATTATTATTATTATCTTTACCAGTATTAGCAGGTGCAATTACTATATTATTAA-GA

GATCGTAATTTAAATACAACATTCTTTGATCCTGCGGGA-GGGGGGGATCCTGTTTTATATCAACATCTATTTTGATTTT

TTGGGC-----

>EU078346.1:188-671 Microctonus aethiopoides isolate SI8b cytochrome oxidase subunit 1 (COI) gene, partial cds; mitochondrial

GGTAATTGGTTAATTCCCTTAATATTAGGAGCTCCTGACATAGTTTTTCCACGTATAAATAATATAAGATTTTGATTACT

CCCCCCGTCATTATTTTTACTTATAACTAGAAGATTTATAAATATTGGGGTAGGGACTGGTTGGACAGTTTATCCTCCTT

TGTCTTTAAATGTTAGTCATAGTGGAATATCTGTTGATATAAGAATTTTTTCTTTACATCTGGCAGGAATTTCTTCTATT

ATAGGGGCAATTAATTTTATTTCTACTATTATAAATATACGTTTAATAGGTTTAATAATAAATAATATTTCTTTATTTGT

ATGATCAGTATTAATTACTGCTGTATTATTATTATTATCTTTACCAGTATTAGCAGGTGCAATTACTATATTATTAA-GA

GATCGTAATTTAAATACAACGTTTTTTGATCCTGCGGGA-GGGGGGGATCCTGTTTTATATCAACATCTATTTTGATTTT

TTGGGC-----

>EU078348.1:188-671 Microctonus aethiopoides isolate SI7b cytochrome oxidase subunit 1 (COI) gene, partial cds; mitochondrial

GGTAATTGGTTAATTCCCTTAATATTAGGAGCTCCTGACATAGTTTTTCCACGTATAAATAATATAAGATTTTGATTACT

CCCCCCGTCATTATTTTTACTTATAACTAGAAGATTTATAAATATTGGGGTAGGGACTGGTTGGACAGTTTATCCTCCTT

TGTCTTTAAATGTTAGTCATAGTGGAATATCTGTTGATATAAGAATTTTTTCTTTACATCTGGCAGGAATTTCTTCTATT

ATAGGGGCAATTAATTTTATTTCTACTATTATAAATATACGTTTAATAGGTTTAATAATAAATAATATTTCTTTATTTGT

ATGATCAGTATTAATTACTGCTGTATTATTATTATTATCTTTACCAGTATTAGCAGGTGCAATTACTATATTATTAA-GA

GATCGTAATTTAAATACAACGTTCTTTGATCCTGCGGGA-GGGGGGGATCCTGTTTTATATCAACATCTATTTTGATTTT

TTGGGC-----

>EU078347.1:188-671 Microctonus aethiopoides isolate SI8c1 cytochrome oxidase subunit 1 (COI) gene, partial cds; mitochondrial

GGTAATTGGTTAATTCCCTTGATATTAGGAGCTCCTGACATAGTTTTTCCACGTATAAATAATATAAGATTTTGATTACT

CCCCCCGTCATTATTTTTACTTATAACTAGAAGATTTATAAATATTGGGGTAGGGACTGGTTGGACAGTTTATCCTCCTT

TGTCTTTAAATGTTAGTCATAGTGGAATATCTGTTGATATAAGAATTTTTTCTTTACATCTGGCAGGAATTTCTTCTATT

ATAGGGGCAATTAATTTTATTTCTACTATTATAAATATACGTTTAATAGGTTTAATAATAAATAATATTTCTTTATTTGT

ATGATCAGTATTAATTACTGCTGTATTATTATTATTATCTTTACCAGTATTAGCAGGTGCAATTACTATATTATTAA-GA

GATCGTAATTTAAATACAACGTTCTTTGATCCTGCGGGA-GGGGGGGATCCTGTTTTATATCAACATCTATTTTGATTTT

TTGGGC-----

>EU078351.1:188-671 Microctonus aethiopoides isolate SI8g cytochrome oxidase subunit 1 (COI) gene, partial cds; mitochondrial

GGTAATTGGTTAATTCCCTTAATATTAGGAGCTCCTGACATAGTTTTTCCACGTATAAATAATATAAGATTTTGATTACT

CCCCCCGTCATTATTTTTACTTATAACTAGAAGATTTATAAATATTGGTGTAGGGACTGGTTGGACAGTTTATCCTCCTT

TGTCTTTAAATGTTAGTCATAGTGGAATATCTGTTGATATAAGAATTTTTTCTTTACATCTGGCAGGAATTTCTTCTATT

ATAGGGGCAATTAATTTTATCTCTACTATTATAAATATACGTTTAATAGGTTTAATAATAAATAATATTTCTTTATTTGT

ATGATCAGTATTAATTACTGCTGTATTATTATTATTATCTTTACCAGTATTAGCAGGTGCAATTACTATATTATTAA-GA

GATCGTAATTTAAATACAACGTTCTTTGATCCTGCGGGA-GGGGGGGATCCTGTTTTATATCAACATCTATTTTGATTTT

TTGGGC-----

>JN980115.1:172-655 Microctonus aethiopoides isolate 10066 cytochrome c oxidase subunit 1 (COI) gene, partial cds; mitochondrial

GGTAATTGGTTAATTCCCTTAATATTAGGAGCTCCTGACATAGTTTTTCCWCGTATAAATAATATAAGATTTTGATTACT

CCCCCCGTCWTTATTTTTACTTATAACCAGAAGATTTATAAATATTGGGGYAGGGACTGGTTGRACWGTTTATCCTCCTT

TGTCTTTAAATGTTAGTCATARTGGAATATCTGTTGATATAAGAATTTTTTCTTTACATCTGGCAGGAATTTCTTCTATT

ATAGGGGCAATTAATTTTATTTCTACTATTATAAATATACGTTTAATAGGTTTAATAATAAATAATATTTCTTTATTTGT

ATGATCAGTATTAATTACTGCTGTATTATTATTATTATCTTTACCAGTATTAGCAGGTGCAATTACTATATTATTAA-GA

GATCGTAATTTAAATACAACGTTCTTTGATCCTGCRGGA-GGGGGGGAYCCTGTTTTATATCAACATCTATTTTGATTTT

TTGGGC-----

>AY039693.2:3-473 Microctonus aethiopoides isolate 2028 cytochrome oxidase subunit I (COI) mRNA, partial cds; mitochondrial gene for mitochondrial product

-------------TTCCTTTAATATTAGGAGCTCCTGACATAGTTTTTCCACGTATAAATAATATAAGATTTTGATTACT

CCCCCCATCATTATTTTTACTTATAACTAGAAGATTTATAAATATTGGGGTAGGGACTGGTTGGACAGTTTATCCTCCTT

TGTCTTTAAATGTTAGTCATAGTGGAATATCTGTTGATATAAGAATTTTTTCCTTACATCTGGCAGGAATTTCTTCTATT

ATAGGGGCAATTAATTTTATCTCTACTATTATAAATATACGTTTAATAGGTTTAATAATAAATAATATTTCTTTATTTGT

ATGATCAGTATTAATTACGGCTGTATTATTATTATTATCTTTACCAGTATTAGCAGGTGCAATTACTATACTATTAA-GA

GATCGTAATTTAAATACAACGTTCTTTGATCCAGCAGGG-GGGGGGGATCCTGTTTTATATCAACATCTATTTTGATTTT

TTGGGC-----

>AY039695.2:1-467 Microctonus aethiopoides isolate 1630a cytochrome oxidase subunit I (COI) mRNA, partial cds; mitochondrial gene for mitochondrial product

-----------------TTTAATATTAGGAGCTCCTGACATAGTTTTTCCACGTATAAATAATATAAGATTTTGATTACT

CCCTCCGTCATTATTTTTACTTATAATTAGGAGATTTATAAATATTGGGGTAGGGACTGGTTGGACAGTTTATCCTCCTT

TGTCTTTAAATGTTAGTCATAGTGGAATATCTGTTGATATAAGAATTTTTTCTTTACATCTGGCAGGAATTTCTTCTATT

ATAGGGGCAATTAATTTTATCTCTACTATTATAAATATACGTTTAATAGGTTTAATAATAAATAATATTTCTTTATTTGT

ATGATCAGTATTAATTACGGCTGTATTATTATTATTATCTTTACCAGTATTAGCAGGTGCAATTACTATACTATTAA-GA

GATCGTAATTTAAATACAACGTTTTTTGACCCAGCAGGG-GGGGGGGATCCTGTTTTATATCAACATCTATTTTGATTTT

TTGGGC-----

>DQ525081.1:188-671 Microctonus aethiopoides haplotype 6 cytochrome oxidase subunit 1 (COI) gene, partial cds; mitochondrial

GGTAATTGATTAATTCCTTTAATATTAGGAGCTCCTGACATAGTTTTTCCACGTATAAATAATATAAGATTTTGATTACT

CCCCCCGTCATTATTTTTACTTATAACTAGAAGATTTATAAATATTGGGGTAGGGACTGGTTGGACAGTTTATCCTCCTT

TGTCTTTAAATGTTAGTCATAGTGGAATATCTGTTGATATAAGAATTTTTTCCTTACATCTGGCAGGAATTTCTTCTATT

ATAGGGGCAATTAATTTTATCTCTACTATTATAAATATACGTTTAATAGGTTTAATAATAAATAATATTTCTTTATTTGT

ATGATCAGTATTAATTACGGCTGTATTACTATTATTATCTTTACCAGTATTAGCAGGTGCAATTACTATACTATTAA-GA

GATCGTAATTTAAATACAACGTTCTTTGATCCAGCAGGG-GGGGGGGATCCTGTTTTATATCAACATCTATTTTGATTTT

TTGGGC-----

>Microctonus_aethiopoides_JN980134.1:188-671 Microctonus aethiopoides isolate 10129 cytochrome c oxidase subunit 1 (COI) gene, partial cds; mitochondrial

GGTAATTGATTAATTCCTTTAATATTAGGAGCTCCTGACATAGTTTTTCCACGTATAAATAATATAAGATTTTGATTACT

CCCCCCGTCATTATTTTTACTTATAACTAGAAGATTTATAAATATTGGGGTAGGGACTGGTTGGACAGTTTATCCTCCTT

TGTCTTTAAATGTTAGTCATAGTGGAATATCTGTTGATATAAGAATTTTTTCCTTACATCTGGCAGGAATTTCTTCTATT

ATAGGGGCAATTAATTTTATCTCTACTATTATAAATATACGTTTAATAGGTTTAATAATAAATAATATTTCTTTATTTGT

ATGATCAGTATTAATTACGGCTGTATTACTATTATTATCTTTACCAGTATTAGCAGGTGCAATTACTATACTATTAA-GA

GATCGTAATTTAAATACAACGTTCTTTGATCCAGCAGGG-GGGGGGGATCCTGTTTTATATCAACATCTATTTTGATTTT

TTGGGC-----

>Microctonus_aethiopoides_JN980133.1:188-671 Microctonus aethiopoides isolate 10127 cytochrome c oxidase subunit 1 (COI) gene, partial cds; mitochondrial

GGTAATTGATTAATTCCTTTAATATTAGGAGCTCCTGACATAGTTTTTCCACGTATAAATAATATAAGATTTTGATTACT

CCCCCCGTCATTATTTTTACTTATAACTAGAAGATTTATAAATATTGGGGTAGGGACTGGTTGGACAGTTTATCCTCCTT

TGTCTTTAAATGTTAGTCATAGTGGGATATCTGTTGATATAAGAATTTTTTCCTTACATCTGGCAGGAATTTCTTCTATT

ATAGGGGCAATTAATTTTATCTCTACTATTATAAATATACGTTTAATAGGTTTAATAATAAATAATATTTCTTTATTTGT

ATGATCAGTATTAATTACGGCTGTATTACTATTATTATCTTTACCAGTATTAGCAGGTGCAATTACTATACTATTAA-GA

GATCGTAATTTAAATACAACGTTCTTTGATCCAGCAGGG-GGGGGGGATCCTGTTTTATATCAACATCTATTTTGATTTT

TTGGGC-----

>DQ525082.1:188-671 Microctonus aethiopoides haplotype 7 cytochrome oxidase subunit 1 (COI) gene, partial cds; mitochondrial

GGTAATTGATTAATTCCTTTAATATTAGGAGCTCCTGACATAGTTTTTCCACGTATAAATAATATAAGATTTTGATTACT

CCCCCCATCATTATTTTTACTTATAACTAGAAGATTTATAAATATTGGGGTAGGGACTGGTTGGACAGTTTATCCTCCTT

TGTCTTTAAATGTTAGTCATAGTGGAATATCTGTTGATATAAGAATTTTTTCCTTACATCTGGCAGGAATTTCTTCTATT

ATAGGGGCAATTAATTTTATCTCTACTATTATAAATATACGTTTAATAGGTTTAATAATAAATAATATTTCTTTATTTGT

ATGATCAGTATTAATTACGGCTGTATTATTATTATTATCTTTACCAGTATTAGCAGGTGCAATTACTATACTATTAA-GA

GATCGTAATTTAAATACAACGTTCTTTGATCCAGCAGGG-GGGGGGGATCCTGTTTTATATCAACATCTATTTTGATTTT

TTGGGC-----

>Microctonus_aethiopoides_JN980126.1:188-671 Microctonus aethiopoides isolate 10117 cytochrome c oxidase subunit 1 (COI) gene, partial cds; mitochondrial

GGTAATTGATTAATTCCTTTAATATTAGGAGCTCCTGACATAGTTTTTCCACGTATAAATAATATAAGATTTTGATTACT

CCCCCCATCATTATTTTTACTTATAACTAGAAGATTTATAAATATTGGGGTAGGGACTGGTTGGACAGTTTATCCTCCTT

TGTCTTTAAATGTTAGTCATAGTGGAATATCTGTTGATATAAGAATTTTTTCCTTACATCTGGCAGGAATTTCTTCTATT

ATAGGGGCAATTAATTTTATCTCTACTATTATAAATATACGTTTAATAGGTTTAATAATAAATAATATTTCTTTATTTGT

ATGATCAGTATTAATTACGGCTGTATTATTATTATTATCTTTACCAGTATTAGCAGGTGCAATTACTATACTATTAA-GA

GATCGTAATTTAAATACAACGTTCTTTGATCCAGCAGGG-GGGGGGGATCCTGTTTTATATCAACATCTATTTTGATTTT

TTGGGC-----

>Microctonus_aethiopoides_JN980127.1:188-671 Microctonus aethiopoides isolate 10119 cytochrome c oxidase subunit 1 (COI) gene, partial cds; mitochondrial

GGTAATTGATTAATTCCTTTAATATTAGGAGCTCCTGACATAATTTTTCCACGTATAAATAATATAAGATTTTGATTACT

CCCCCCATCATTATTTTTACTTATAACTAGAAGATTTATAAATATTGGGGTAGGGACTGGTTGGACAGTTTATCCTCCTT

TGTCTTTAAATGTTAGTCATAGTGGAATATCTGTTGATATAAGAATTTTTTCCTTACATCTGGCAGGAATTTCTTCTATT

ATAGGGGCAATTAATTTTATCTCTACTATTATAAATATACGTTTAATAGGTTTAATAATAAATAATATTTCTTTATTTGT

ATGATCAGTATTAATTACGGCTGTATTATTATTATTATCTTTACCAGTATTAGCAGGTGCAATTACTATACTATTAA-GA

GATCGTAATTTAAATACAACGTTCTTTGATCCAGCAGGG-GGGGGGGATCCTGTTTTATATCAACATCTATTTTGATTTT

TTGGGC-----

>Microctonus_aethiopoides_JN980135.1:188-671 Microctonus aethiopoides isolate 10130 cytochrome c oxidase subunit 1 (COI) gene, partial cds; mitochondrial

GGTAATTGATTAATTCCTTTAATATTAGGAGCTCCTGACATAGTTTTTCCACGTATAAATAATATAAGATTTTGATTACT

CCCCCCTTCATTATTTTTACTTATAACTAGAAGATTTATAAATATTGGGGTAGGGACTGGTTGGACAGTTTATCCTCCTT

TGTCTTTAAATGTTAGTCATAGTGGAATATCTGTTGATATAAGAATTTTTTCCTTACATCTGGCAGGAATTTCTTCTATT

ATAGGGGCAATTAATTTTATCTCTACTATTATAAATATACGTTTAATAGGTTTAATAATAAATAATATTTCTTTATTTGT

ATGATCAGTATTAATTACGGCTGTATTATTATTATTATCTTTACCAGTATTAGCAGGTGCAATTACTATACTATTAA-GA

GATCGTAATTTAAATACAACGTTCTTTGATCCAGCAGGG-GGGGGGGATCCTGTTTTATATCAACATCTATTTTGATTTT

TTGGGC-----

>EU078340.1:188-671 Microctonus aethiopoides isolate SI8a cytochrome oxidase subunit 1 (COI) gene, partial cds; mitochondrial

GGTAATTGATTAATTCCTTTAATATTAGGAGCTCCTGACATAGTTTTTCCACGTATAAATAATATAAGATTTTGATTACT

CCCTCCGTCATTATTTTTACTTATAATTAGGAGATTTATAAATATTGGGGTAGGGACTGGTTGGACAGTTTATCCTCCTT

TGTCTTTAAATGTTAGTCATAGTGGAATATCTGTTGATATAAGAATTTTTTCTTTACATCTGGCAGGAATTTCTTCTATT

ATAGGGGCAATTAATTTTATCTCTACTATTATAAATATACGTTTAATAGGTTTAATAATAAATAATATTTCTTTATTTGT

ATGATCAGTATTAATTACGGCTGTATTATTATTATTATCTTTACCAGTATTAGCAGGTGCAATTACTATACTATTAA-GA

GATCGTAATTTAAATACAACGTTTTTTGACCCAGCAGGG-GGGGGGGATCCTGTTTTATATCAACATCTATTTTGATTTT

TTGGGC-----

>HQ930191.1:188-658 Euphorinae sp. BBHYH182-10 voucher BIOUG<CAN>:10BBHYM-1205 cytochrome oxidase subunit 1 (COI) gene, partial cds; mitochondrial

GGAAATTGATTAGTTCCCTTAATGTTGGGGGCCCCTGATATAATATTTCCTCGAATGAATAATATAAGATTTTGATTATT

ACCTTTTTCTTTATTTTTATTATTGATTAGAATATTTTTAAATATCGGCACAGGTACAGGATGAACTGTTTATCCTCCTT

TATCATTAAATGTTAGGCATAGGGGAGTATCTGTAGATTTAAGAATTTTTTCTTTACATTTAGCAGGGATTTCTTCTATT

ATAGGTGCAATTAATTTTATTACTACTATTTTAAATATGCGTTTATTAGGTTTAATAATAAATAATATTTCTTTATTTAT

TTGATCTGTTATAATTACGGCTATTTTATTATTATTATCTTTACCTGTATTGGCTGGGGCTATTACTATATTATTGA-CT

GATCGTAATTTGAACACAACTTTTTTTGATCCTGCGGGA-GGGGGGGATCCTGTTTTATATCAACATTTATTT-------

-----------

>KF966588.1:120-590 Braconidae sp. C19025 cytochrome c oxidase subunit 1 (COI) gene, partial cds; mitochondrial

GGGAATTGATTAATTCCTTTGATATTAGGGGCTCCTGATATAATATTTCCACGAATAAATAATATGAGATTTTGATTATT

ACCTTTTTCATTATTTTTATTATTAATTAGAATATTTTTAAATATTGGAATTGGTACCGGGTGAACTATTTATCCTCCTT

TATCTTTGAATATTAGTCATAGAGGTATATCAGTTGATTTAAGACTTTTTTCTTTACATTTAGCAGGGATTTCATCTATT

ATAGGAGCAATTAATTTTATTTCTACTATTTTAAATATGCATTTATTAGGTTTAATAATAAATAATATTTCTTTATTTAT

TTGATCTGTAATAATTACGGCTATTTTATTATTATTATCTTTGCCAGTTTTAGCCGGGGCTATTACTATATTATTGA-CT

GATCGTAATTTAAATACAACATTTTTTGATCCAGCAGGG-GGGGGGGATCCTGTTTTATATCAACATTTATTT-------

-----------

>HQ930288.1:188-642 Microctonus sp. BOLD:AAB6779 voucher BIOUG<CAN>:10BBHYM-1354 cytochrome oxidase subunit 1 (COI) gene, partial cds; mitochondrial

GGTAATTGATTAATTCCTTTAATATTAGGGGCTCCAGATATAATATTTCCTCGAATAAATAATATAAGATTTTGGTTATT

GCCTTTTTCTTTAATTTTATTATTAATTAGAAGATTTTTAAATATTGGAACAGGGACAGGATGGACTGTTTATCCTCCCT

TATCATTAAATGTTAGTCATGGGGGAGTTTCAGTTGATTTAAGAATTTTTTCTTTACATTTAGCAGGAATTTCTTCTATT

ATAGGAGCAGTTAATTTTATTTCTACTATTTTAAATATGCGTTTATTAGGATTGATAATAAATAACATTTCTTTATTTAT

TTGGTCAGTTATAATTACAGCTATTTTATTATTATTATCTTTACCAGTTTTAGCGGGGGCTATTACTATATTATTAA-CT

GATCGAAATTTAAATACAACATTTTTTGATCCTGCTGGG-GGGGGGGATCCAGTTTT-----------------------

-----------

>HQ930289.1:188-658 Microctonus sp. BOLD:AAB6779 voucher BIOUG<CAN>:10BBHYM-1355 cytochrome oxidase subunit 1 (COI) gene, partial cds; mitochondrial

GGTAATTGATTAATTCCTTTAATATTAGGGGCTCCAGATATAATATTTCCTCGAATAAATAATATAAGATTTTGGTTATT

GCCTTTTTCTTTAATTTTATTATTAATTAGAAGATTTTTAAATATTGGAACAGGGACAGGATGGACTGTTTATCCTCCCT

TATCATTAAATGTTAGTCATGGGGGAGTTTCAGTTGATTTAAGAATTTTTTCTTTACATTTAGCAGGAATTTCTTCTATT

ATAGGAGCAGTTAATTTTATTTCTACTATTTTAAATATGCGTTTATTAGGATTGATAATAAATAACATTTCTTTATTTAT

TTGGTCAGTTATAATTACAGCTATTTTATTATTATTATCTTTACCAGTTTTAGCGGGGGCTATTACTATATTATTAA-CT

GATCGAAATTTAAATACAACATTTTTTGATCCTGCTGGG-GGGGGGGATCCAGTTTTGTATCAACATTTATTT-------

-----------

>HQ930290.1:188-658 Microctonus sp. BOLD:AAB6779 voucher BIOUG<CAN>:10BBHYM-1356 cytochrome oxidase subunit 1 (COI) gene, partial cds; mitochondrial

GGTAATTGATTAATTCCTTTAATATTAGGGGCTCCAGATATAATATTTCCTCGAATAAATAATATAAGATTTTGGTTATT

GCCTTTTTCTTTAATTTTATTATTAATTAGAAGATTTTTAAATATTGGAACAGGGACAGGATGGACTGTTTATCCTCCCT

TATCATTAAATGTTAGTCATGGGGGAGTTTCAGTTGATTTAAGAATTTTTTCTTTACATTTAGCAGGAATTTCTTCTATT

ATAGGAGCAGTTAATTTTATTTCTACTATTTTAAATATGCGTTTATTAGGATTGATAATAAATAACATTTCTTTATTTAT

TTGGTCAGTTATAATTACAGCTATTTTATTATTATTATCTTTACCAGTTTTAGCGGGGGCTATTACTATATTATTAA-CT

GATCGAAATTTAAATACAACATTTTTTGATCCTGCTGGG-GGGGGGGATCCAGTTTTGTATCAACATTTATTT-------

-----------

>JN292647.1:103-573 Microctonus sp. BBHYI770-10 voucher BIOUG<CAN>:10BBCHY-0770 cytochrome oxidase subunit 1 (COI) gene, partial cds; mitochondrial

GGAAATTGATTAATTCCTATAATATTAGGGGCACCTGATATAGCTTTTCCTCGAATAAATAATATAAGATTTTGGTTACT

ACCTCCGTCTTTATTTTTACTATTAATTAGGAGATTTTTAAATATTGGAACTGGTACTGGGTGAACAGTTTATCCACCTT

TATCTTTAAATATTAGTCATAGTGGGATTTCAGTTGATATAAGAATTTTTTCTTTACATTTAGCTGGAATTTCCTCAATT

ATAGGGGCTATTAATTTTATTTCTACTATTATTAATATACGATTAATAGGAGTATTAATAAATAATATTTCTTTATTTGT

ATGATCTGTATTAATTACTGCAATTTTATTATTATTATCATTACCTGTATTAGCTGGGGCTATTACTATATTATTAA-GA

GATCGTAATTTAAATACAACATTTTTTGATCCTGCGGGA-GGGGGGGATCCTGTTTTATATCAACATTTATTT-------

-----------

>JN980125.1:188-669 Microctonus sp. CJV-2012 isolate 10079 cytochrome c oxidase subunit 1 (COI) gene, partial cds; mitochondrial

GGAAATTGATTAATTCCTTTAATATTAGGGGCACCTGATATAGCTTTTCCTCGAATAAATAATATAAGATTTTGGTTATT

ACCCCCGTCTTTATTTTTATTATTAATTAGGAGATTTTTAAATATTGGAACTGGTACTGGGTGAACAGTTTACCCACCTT

TATCTTTAAATGTTAGTCATAGAGGGATTTCAGTTGATATAAGAATTTTTTCTTTACATTTAGCTGGAATCTCCTCAATT

ATAGGGGCTATTAATTTTATTTCTACTATTATTAATATACGATTGATAGGAGTATTAATAAATAATATTTCTTTATTTGT

ATGATCTGTATTAATTACTGCAATTTTATTATTATTATCATTACCTGTATTAGCTGGGGCTATTACTATATTATTAA-GA

GATCGTAATTTAAATACAACATTTTTTGATCCTGCAGGA-GGGGGGGATCCTGTTTTATATCAACATTTATTTTGATTTT

TTGG-------

>MG442291.1:187-657 Euphorinae sp. BIOUG25563-B05 cytochrome oxidase subunit 1 (COI) gene, partial cds; mitochondrial

GGTAACTGATTAATTCCTTTAATATTAGGAGCCCCTGATATAGTTTTTCCTCGAATAAATAATATAAGATTTTGATTGTT

GCCCCCATCTTTATTTTTATTAATAATTAGAAGATTTTTAAATATTGGTACAGGGACGGGTTGAACTGTTTACCCTCCTT

TATCTTTAAATATTAGACATAGAGGAATTTCTGTTGATATAAGAATTTTTTCTTTACATTTAGCAGGAATTTCGTCTATT

ATAGGGGCAATTAATTTTATTTCAACTATTTTTAATATGCGATTATTAGGATTATTAATAAATAATATTTCTTTATTTAT

TTGGTCAGTTTTAATTACTGCTGTTTTATTATTATTATCTTTACCTGTATTAGCGGGAGCAATTACTATGTTATTAA-GG

GATCGAAATTTAAATACAACTTTTTTTGACCCTGCAGGG-GGGGGAGATCCGGTTTTATATCAACATTTATTT-------

-----------

>Euphorinae_sp._MG442671.1:188-658 Euphorinae sp. BIOUG25599-E01 cytochrome oxidase subunit 1 (COI) gene, partial cds; mitochondrial

GGTAACTGATTAATTCCTTTAATATTAGGAGCCCCTGATATAGTTTTTCCTCGAATAAATAATATAAGATTTTGATTGTT

GCCCCCATCTTTATTTTTATTAATAATTAGAAGATTTTTAAATATTGGTACAGGGACGGGTTGAACTGTTTACCCTCCTT

TATCTTTAAATATTAGACATAGAGGAATTTCTGTTGATATAAGAATTTTTTCTTTACATTTAGCAGGAATTTCGTCTATT

ATAGGGGCAATTAATTTTATTTCAACTATTTTTAATATGCGATTATTAGGATTATTAATAAATAATATTTCTTTATTTAT

TTGGTCAGTTTTAATTACTGCTGTTTTATTATTATTATCTTTACCTGTATTAGCGGGAGCAATTACTATGTTATTAA-GG

GATCGAAATTTAAATACAACTTTTTTTGACCCTGCAGGG-GGGGGAGATCCGGTTTTATATCAACATTTATTT-------

-----------

>MH790287.1:188-658 Microctonus brassicae cytochrome oxidase subunit 1 (COI) gene, partial cds; mitochondrial

GGTAATTGACTAATTCCTTTAATATTAGGAGCTCCTGATATAGTTTTTCCTCGAATAAATAATATAAGATTTTGATTATT

ACCTCCTTCCTTATTTTTATTAATAATTAGAAGATTTTTAAATATTGGAACGGGGACAGGTTGAACTGTTTATCCACCTT

TATCTTTAAATATTAGTCATAGGGGAATTTCTGTTGATATAAGAATTTTTTCCTTACATTTAGCAGGAATTTCTTCAATT

ATAGGGGCAATTAATTTTATTTCSACTATTTTTAATATACGCTTATTAGGATTATTAATAAATAATATTTCTTTATTTAT

TTGATCAGTTTTAATTACTGCTGTTTTATTATTATTATCTTTACCTGTATTAGCAGGAGCAATTACTATATTATTAA-GG

GATCGAAATTTAAATACAACTTTTTTTGATCCTGCGGGA-GGGGGGGATCCTGTTTTATATCAACATTTATTT-------

-----------

>EU078360.1:188-671 Microctonus hyperodae isolate 9275 cytochrome oxidase subunit 1 (COI) gene, partial cds; mitochondrial

GGTAATTGATTAGTACCTTTAATATTAGGAGGTCCTGATATAATATTTCCTCGAATAAATAATATAAGATTTTGATTATT

ACTTCCTTCCTTATTTTTATTGGTAGTTAGGAGATTTTTAAATATTGGAACTGGAACAGGATGAACTGTATATCCTCCAT

TATCATTGAATGTAAGTCATAGAGGTATTTCTGTTGATATAAGAATTTTTTCTTTACATTTAGCAGGTGTTTCTTCAATT

ATGGGGGCAGTTAATTTTATTTCAACAATTTTTAATATACGATTATTAGGATTATTGATAAATAATATTTCTTTATTTGT

TTGATCTGTTATTATTACAGCTGTTTTATTATTATTATCTTTACCTGTTTTAGCAGGTGCAATTACTATATTATTAA-CT

GATCGCAATTTAAATACTACTTTTTTTGATCCTGCAGGG-GGGGGGGATCCTGTATTATATCAACATTTATTTTGATTTT

TTGGGC-----

>JQ801634.1:188-671 Microctonus hyperodae isolate 7511 cytochrome c oxidase subunit 1 gene, partial cds; mitochondrial

GGTAATTGATTAGTACCTTTAATATTAGGAGGTCCTGATATAATATTTCCTCGAATAAATAATATAAGATTTTGATTATT

ACTTCCTTCTTTATTTTTATTGGTAGTTAGGAGATTTTTAAATATTGGAACTGGAACAGGATGAACTGTATATCCTCCAT

TATCATTGAATGTGAGTCATAGAGGTATTTCTGTTGATATAAGAATTTTTTCTTTACATTTAGCAGGTGTTTCTTCAATT

ATGGGGGCAGTTAATTTTATTTCAACAATTTTTAATATACGATTATTAGGATTATTGATAAATAATATTTCTTTATTTGT

TTGGTCTGTTATTATTACAGCTGTTTTATTATCACTATCTTTGCCTGTTTTAGCAGGTGCAATTACTATATTATTAA-CT

GATCGCAATTTAAATACTACTTTTTTTGATCCTGCAGGG-GGGGGGGATCCTGTATTATATCAACATTTATTTTGATTTT

TTGGGC-----

>MG445708.1:188-658 Microctonus sp. BIOUG27518-E10 cytochrome oxidase subunit 1 (COI) gene, partial cds; mitochondrial

GGGAATTGATTAGTTCCTTTAATATTAGGGGCTCCTGATATAATATTTCCTCGAATAAATAATATAAGATTTTGATTATT

ACCCCCTTCTTTATTTATATTGGTGATTAGAAATTTTTTAAATATTGGTACAGGGACTGGATGGACTATTTATCCTCCTC

TTTCTTTAAATATTAGGCATAGAGGAGTTTCTGTTGATATAAGTATTTTTTCTTTACATTTAGCAGGTATTTCTTCAATT

ATAGGGGCAATTAATTTTATTTCAACTATTATAAATATACAATTAATAGGATTGATAATAAATAATCTTTCTTTATTTAT

TTGATCAGTAATAATTACAGCTGTATTATTATTATTATCACTACCAGTTTTAGCAGGGGCTATTACAATATTATTAA-CC

GATCGTAATTTAAATACTACATTTTTTGATCCTGTTGGT-GGGGGGGATCCAGTATTATATCAACATTTATTT-------

-----------

>EU078361.1:188-669 Microctonus zealandicus isolate 9192 cytochrome oxidase subunit 1 (COI) gene, partial cds; mitochondrial

GGGAATTGATTAGTACCTTTAATATTAGGGGCTCCTGATATAGCTTTTCCTCGAATAAATAATATAAGATTTTGGTTATT

ACCTCCCTCTTTATTATTATTGTTAATGAGAATATTTATAAATGTTGGCACAGGAACAGGGTGAACTATTTATCCCCCGT

TATCTTTAAATGTAAGTCATAGAGGAGTTTCTGTTGATATAAGAATTTTTTCTTTACATTTGGCTGGGGTTTCTTCAATT

ATAGGAGCTATTAATTTTATTTCTACTATTTTAAATATACGGTTAATAGGATTATTAATAAACAATATTCCTTTATTTGT

TTGGTCTGTTAATATTACTGCGGTATTATTATTATTATCATTACCCGTTTTAGCCGGGGCTATTACTATATTATTAA-CT

GATCGTAATTTAAATACTACATTTTTTGATCCGGTTGGG-GGTGGGGATCCTGTTTTATATCAACATTTATTTTGATTTT

TTGG-------

>KJ591474.1:186-656 Microctonus sp. 7 JMS-2015 voucher AB079 cytochrome oxidase subunit I (COI) gene, partial cds; mitochondrial

GGAAATTGATTAATTCCTTTGATATTAGGAGCTCCTGATATAGCTTTTCCTCGAATAAATAATATAAGATTTTGATTATT

AACTCCTTCTTTATTTTTTTTATTAATGAGAATATTTTTGGGAATAGGAACTGGAACTGGATGAACTGTTTATCCCCCTT

TATCTTTAAATATTAGACATAGGGGAATTTCTGTTGATATAAGAATTTTTTCTTTACATTTAGCAGGTATTTCTTCAATT

ATAGGAGCTATTAATTTTATTTCTACTGTCATAAATATGCGTTTATTGGGGTTATTATTAAGAAATATATCTTTATTTAT

TTGGTCAGTAAAAATTACTGCTATTTTATTATTATTATCTTTACCAGTTTTGGCGGGTGCAATTACTATATTATTAA-TT

GATCGAAATTTAAATACCTCATTTTTTGACCCAGCAGGG-GGGGGAGACCCTGTTTTATATCAACATTTATTT-------

-----------

>KJ158158.1:12-495 Microctonus sp. MSR-2014 cytochrome oxidase subunit I (COI) gene, partial cds; mitochondrial

GGAAATTGATTAGTTCCTTTAATGTTGGGGGCCCCAGATATAATATTTCCACGAATGAATAATATAAGATTTTGGTTATT

ACCTATATCTTTATTTTTATTAATGATTAGAAGATTTTTAAATGTTGGGGTTGGAACTGGGTGAACAGTGTATCCCCCAT

TATCTTTAAATGTAAGTCATAGGGGTATTTCAGTAGATTTAAGAATTTTTTCTCTACATTTAGCAGGGATTTCTTCTATT

ATAGGGGCAATTAATTTTATTTCAACTATTTTAAATATACGCTTATCAGGAATATCTGTAAATAATATTTCTTTATTTAT

TTGATCAGTTATAATTACAGCTATATTATTATTATTAGCTTTACCAGTTTTGGCAGGAGCTATTACAATATTATTAA-CA

GATCGTAATTTAAATACTACATTTTTTGATCCTGCTGGG-GGGGGGGATCCTGTGTTATATCAGCATTTATTTTGATTTT

TTGGGC-----

>JX829580.1:187-657 Perilitus sp. BOLD:AAB5729 voucher 07PROBE-24060 cytochrome oxidase subunit 1 (COI) gene, partial cds; mitochondrial

GGAAATTGATTAATTCCTTTAATATTAGGGGCTCCCGATATAGCTTTCCCTCGTATAAATAATATAAGATTTTGATTATT

ACCCCCCTCTTTATTTTTATTATTAATAAGTAGTTTTTTAAATATTGGTACAGGTACGGGTTGAACAGTTTATCCCCCCC

TATCTTTAAATGTAAGTCATAGGGGGATTTCAGTTGATATGAGAATTTTTTCATTACATTTAGCAGGAATTTCTTCTATT

ATGGGGGCTATTAATTTTATTTCTACAATTTTAAATATACAATTATTGGGATTATATTTAAATAATCTATCTTTATTTAT

TTGATCTGTAGGTATTACAGCAGTTTTATTATTGTTATCTTTACCAGTATTAGCGGGAGCCATTACAATATTATTAT-TT

GATCGTAATTTAAATACAACGTTTTTTGATCCAGCGGGG-GGTGGGGATCCAGTTTTATATCAACATTTATTT-------

-----------

>Perilitus_falciger_KJ591485.1:188-658 Perilitus falciger voucher JS10_00509 cytochrome oxidase subunit I (COI) gene, partial cds; mitochondrial

GGAAATTGGTTGATTCCTCTTATATTAGGGGCACCTGATATAGCTTTCCCTCGGATAAATAATATAAGATTTTGGTTATT

ACCCCCTTCATTATTTTTATTATTAATAAGTAGATTTTTAAATATCGGTACAGGAACAGGTTGAACAGTTTATCCTCCCT

TATCTTTAAATGTAAGTCATAGAGGGGTATCAGTAGATATAAGGATTTTCTCATTACATTTAGCAGGCATATCTTCAATT

ATAGGGGCAATTAATTTTATTTCTACAATTATAAATATGCGTTTATTAGGAATATCATTAAGTAGAATTTCTTTATTTAT

TTGATCTGTTGGTATTACAGCAATTTTATTATTATTATCTTTACCTGTATTAGCAGGGGCTATTACAATATTGTTAT-TT

GATCGAAATTTAAATACTACATTTTTTGATCCAGCGGGG-GGAGGGGATCCAGTTTTATATCAACATTTATTT-------

-----------

>EU078358.1:172-653 Microctonus aethiopoides isolate SI3b cytochrome oxidase subunit 1 (COI) gene, partial cds; mitochondrial

GGAAATTGATTAATTCCGTTAATAATAGGAGCTCCTGATATGGCATTTCCTCGTATGAATAATATAAGATTTTGATTATT

GCCTCCTTCTTTATTTATATTATTAATAAGAAATTTTTTAAGAATGGGGGCAGGTACTGGATGAACTGTTTATCCTCCTT

TATCTTTAAATATTAGTCATAGAGGAGTATCTGTTGATATAGCTATTTTTTCTTTACATTTGGCAGGTATTTCATCAATT

ATAGGAGCTATTAATTTTATTTCTACTATTATAAATATACGACTTTTAGGATTAAAATTTGATTCTCTTTCATTATTTAT

TTGATCAGTTTTAATTACAGCAATTTTATTATTATTATCATTACCTGTTTTAGCAGGGGCTATTACTATATTATTAA-CT

GATCGTAATTTGAATACTTCTTTTTATGATCCAGCAGGG-GGGGGTGATCCTGTTTTATACCAACATTTATTTTGATTTT

TTGG-------

>EU078359.1:172-653 Microctonus sp. SI1b2 cytochrome oxidase subunit 1 (COI) gene, partial cds; mitochondrial

GGAAATTGATTAATTCCGTTAATAATAGGAGCTCCTGATATGGCATTTCCTCGTATGAATAATATAAGATTTTGATTATT

GCCTCCTTCTTTATTTATATTATTAATAAGAAATTTTTTAAGAATGGGGGCAGGAACTGGATGAACTGTTTATCCTCCTT

TATCTTTAAATATTAGTCATAGAGGAGTATCTGTTGATATAGCTATTTTTTCTTTACATTTGGCAGGTATTTCATCAATT

ATAGGAGCTATTAATTTTATTTCTACTATTATAAATATACGACTTTTAGGATTAAAATTTGATTCTCTTTCATTATTTAT

TTGATCAGTTTTAATTACAGCAATTTTATTATTATTATCATTACCTGTTTTAGCAGGGGCTATTACTATATTATTAA-CT

GATCGTAATTTGAATACTTCTTTTTATGATCCAGCAGGG-GGGGGTGATCCTGTTTTATACCAACATTTATTTTGATTTT

TTGG-------

>HM373924.1:188-658 Meteorinae sp. BOLD:AAH1467 voucher USNM:ENT:00681710 cytochrome oxidase subunit 1 (COI) gene, partial cds; mitochondrial

GGAAATTGATTAATGCCATTAATATTAGGAGCTCCTGATATGGCTTTTCCTCGAATGAATAATATAAGATTTTGATTATT

AATTCCTTCTATTTTTATATTATTAATAAGAAGTTTAGTAAGAGTAGGGGCTGGGACTGGTTGAACTGTTTATCCTCCAT

TATCTTTGAATGTTAGACATGGGGGGATTTCTGTTGATATAGCTATTTTTTCTTTACATTTAGCTGGAGTTTCTTCCATT

ATAGGTACAATAAATTTTATTACAACAATTATAAATATACATTTAATAGGTTTAAATTTAGATAATATTTCTTTATTTGT

ATGATCAGTAATAATTACTGCAGTTTTATTATTATTATCTTTACCTGTATTGGCGGGTGCAATTACTATATTATTTA-CT

GATCGTAATTTAAATACTTCATTTTTTGATCCTGCAGGA-GGGGGGGATCCTATTTTATATCAACATTTATTT-------

-----------

>HM423232.1:188-658 Meteorus sp. BOLD:ACE9478 voucher BIOUG<CAN>:09BBHYM-503 cytochrome oxidase subunit 1 (COI) gene, partial cds; mitochondrial

GGAAATTGACTAATTCCTTTAATATTAGGGGCTCCTGATATAGCTTTCCCTCGAATAAATAATATAAGATTTTGATTATT

AATTCCTTCTATATTTTTTCTTCTTATAAGTAGAATAATTAATATGGGGGTAGGGACTGGATGAACAGTGTATCCTCCCT

TATCTTTAAATATGAGGCATGGAGGGATATCTGTAGATTTAGCTATTTTTTCTTTACATTTAGCAGGGGCTTCTTCTATT

ATAGGGGCTGTAAATTTTATTACTACTATTATTAATATACAATTAATAGGATTAAAATTGGATAATATTAGTTTATTTGT

TTGATCAGTTTTAATTACGGCTATTTTATTATTATTATCTTTACCTGTTTTAGCAGGGGCAATTACAATATTATTAA-CA

GATCGTAATTTAAATACATCTTTTTTTGATCCTGCGGGG-GGGGGAGATCCAATTTTGTACCAGCATTTATTT-------

-----------

>HQ567521.1:188-658 Meteorus sp. BOLD:ACE9478 voucher BIOUG<CAN>:09BBHYM-1038 cytochrome oxidase subunit 1 (COI) gene, partial cds; mitochondrial

GGAAATTGATTAATTCCTTTAATATTAGGGGCTCCTGATATAGCTTTCCCTCGAATAAATAATATAAGATTTTGATTATT

AATTCCTTCTATATTTTTTCTTCTTATAAGTAGAATAATTAATATGGGGGTAGGGACTGGATGAACAGTGTATCCTCCCT

TATCTTTAAATATGAGGCATGGAGGGATATCTGTAGATTTAGCTATTTTTTCTTTACATTTAGCAGGGGCTTCTTCTATT

ATAGGGGCTGTAAATTTTATTACTACTATTATTAATATACAATTAATAGGATTAAAATTGGATAATATTAGTTTATTTGT

TTGATCAGTTTTAATTACGGCTATTTTATTATTATTATCTTTACCTGTTTTAGCAGGGGCAATTACAATATTATTAA-CA

GATCGTAATTTAAATACATCTTTTTTTGATCCTGCGGGG-GGGGGAGATCCAATTTTGTACCAGCATTTATTT-------

-----------

>MN309814.1:187-668 Meteorus laphygmae isolate ANS582 cytochrome oxidase subunit I (COI) gene, partial cds; mitochondrial

GGAAATTGATTAATTCCTTTAATATTAGGGGCTCCTGATATAGCTTTCCCTCGAATAAATAATATAAGATTTTGATTATT

AATTCCTTCTATATTTTTTCTTCTTATAAGTAGAATAATTAATATGGGGGTAGGGACTGGATGAACAGTGTATCCTCCCT

TATCTTTAAATATGAGGCATGGAGGAATATCTGTAGATTTAGCTATTTTTTCTTTACATTTAGCAGGGGCTTCTTCTATT

ATAGGGGCTGTAAATTTTATTACTACTATTATTAATATACAATTAATAGGATTAAAATTGGATAATATTAGTTTATTTGT

TTGATCAGTTTTAATTACGGCTATTTTATTATTATTATCTTTACCTGTTTTAGCAGGGGCAATTACAATATTATTAA-CA

GATCGTAATTTAAATACATCTTTTTTTGATCCTGCGGGG-GGGGGAGATCCAATTTTGTACCAGCATTTATTTTGATTTT

TTGG-------

>MN309816.1:187-668 Meteorus laphygmae isolate ANS584 cytochrome oxidase subunit I (COI) gene, partial cds; mitochondrial

GGAAATTGACTAATTCCTTTAATATTAGGGGCTCCTGATATAGCTTTCCCTCGAATAAATAATATAAGATTTTGATTATT

AATTCCTTCTATATTTTTTCTTCTTATAAGTAGAATAATTAATATGGGGGTAGGGACTGGATGAACAGTGTATCCTCCCT

TATCTTTAAATATGAGGCATGGAGGGATATCTGTAGATTTAGCTATTTTTTCTTTACATTTAGCAGGGGCTTCTTCTATT

ATAGGGGCTGTAAATTTTATTACTACTATTATTAATATACAATTAATAGGATTAAAATTGGATAATATTAGTTTATTTGT

TTGATCAGTTTTAATTACGGCTATTTTATTATTATTATCTTTACCTGTTTTAGCAGGGGCAATTACAATATTATTAA-CA

GATCGTAATTTAAATACATCTTTTTTTGATCCTGCGGGG-GGGGGAGATCCAATTTTGTACCAGCATTTATTTTGATTTT

TTGG-------

>MN309817.1:187-668 Meteorus arizonensis isolate ANS576 cytochrome oxidase subunit I (COI) gene, partial cds; mitochondrial

GGAAATTGACTAATTCCTTTAATATTAGGGGCTCCTGATATAGCTTTCCCTCGAATAAATAATATAAGATTTTGATTATT

AATTCCTTCTATATTTTTTCTTCTTATAAGTAGAATAATTAATATGGGGGTAGGGACTGGATGAACAGTGTATCCTCCCT

TATCTTTAAATATGAGGCATGGAGGGATATCTGTAGATTTAGCTATTTTTTCTTTACATTTAGCAGGGGCTTCTTCTATT

ATAGGGGCTGTAAATTTTATTACTACTATTATTAATATACAATTAATAGGATTAAAATTGGATAATATTAGTTTATTTGT

TTGATCAGTTTTAATTACGGCTATTTTATTATTATTATCTTTACCTGTTTTAGCAGGGGCAATTACAATATTATTAA-CA

GATCGTAATTTAAATACATCTTTTTTTGATCCTGCGGGG-GGGGGAGATCCAATTTTGTACCAGCATTTATTTTGATTTT

TTGG-------

>MN309819.1:187-668 Meteorus arizonensis isolate ANS578 cytochrome oxidase subunit I (COI) gene, partial cds; mitochondrial

GGAAATTGACTAATTCCTTTAATATTAGGGGCTCCTGATATAGCTTTCCCTCGAATAAATAATATAAGATTTTGATTATT

AATTCCTTCTATATTTTTTCTTCTTATAAGTAGAATAATTAATATGGGGGTAGGGACTGGATGAACAGTGTATCCTCCCT

TATCTTTAAATATGAGGCATGGAGGGATATCTGTAGATTTAGCTATTTTTTCTTTACATTTAGCAGGGGCTTCTTCTATT

ATAGGGGCTGTAAATTTTATTACTACTATTATTAATATACAATTAATAGGATTAAAATTGGATAATATTAGTTTATTTGT

TTGATCAGTTTTAATTACGGCTATTTTATTATTATTATCTTTACCTGTTTTAGCAGGGGCAATTACAATATTATTAA-CA

GATCGTAATTTAAATACATCTTTTTTTGATCCTGCGGGG-GGGGGAGATCCAATTTTGTACCAGCATTTATTTTGATTTT

TTGG-------

>MN309815.1:187-668 Meteorus laphygmae isolate ANS574 cytochrome oxidase subunit I (COI) gene, partial cds; mitochondrial

GGAAATTGATTAATTCCTTTAATATTAGGGGCCCCTGATATAGCTTTCCCTCGAATAAATAATATAAGATTTTGATTATT

AATTCCTTCTATATTTTTTCTTCTTATAAGTAGAATAATTAATATGGGGGTAGGGACTGGATGAACAGTGTATCCTCCCT

TATCTTTAAATATGAGGCATGGAGGGATATCTGTAGATTTAGCTATTTTTTCTTTACATTTAGCAGGGGCTTCTTCTATT

ATAGGGGCTGTAAATTTTATTACTACTATTATTAATATACAATTAATAGGATTAAAATTGGATAATATTAGTTTATTTGT

TTGATCAGTTTTAATTACGGCTATTTTATTATTATTATCTTTACCTGTTTTAGCAGGGGCAATTACAATATTATTAA-CA

GATCGTAATTTAAATACATCTTTTTTTGATCCTGCGGGT-GGGGGAGATCCAATTTTGTACCAGCATTTATTTTGATTTT

TTGG-------

>MN309818.1:187-668 Meteorus laphygmae isolate ANS580 cytochrome oxidase subunit I (COI) gene, partial cds; mitochondrial

GGAAATTGACTAATTCCTTTAATATTAGGGGCCCCTGATATAGCTTTCCCTCGAATAAATAATATAAGATTTTGATTATT

AATTCCTTCTATATTTTTTCTTCTTATAAGTAGAATAATTAATATGGGGGTAGGGACTGGATGAACAGTATATCCTCCCT

TATCTTTAAATATGAGGCATGGAGGGATATCTGTAGATTTAGCTATTTTTTCTTTACATTTAGCAGGGGCTTCTTCTATT

ATAGGGGCTGTAAATTTTATTACTACTATTATTAATATACAATTAATAGGATTAAAATTGGATAATATTAGTTTATTTGT

TTGATCAGTTTTAATTACGGCTATTTTATTATTATTATCTTTACCTGTTTTAGCAGGGGCAATTACAATATTATTAA-CA

GATCGTAATTTAAATACATCTTTTTTTGATCCTGCGGGT-GGGGGAGATCCAATTTTGTACCAGCATTTATTTTGATTTT

TTGG-------

>MN309821.1:187-668 Meteorus arizonensis isolate ANS568 cytochrome oxidase subunit I (COI) gene, partial cds; mitochondrial

GGAAATTGACTAATTCCTTTAATATTAGGGGCCCCTGATATAGCTTTCCCTCGAATAAATAATATAAGATTTTGATTATT

AATTCCTTCTATATTTTTTCTTCTTATAAGTAGAATAATTAATATGGGGGTAGGGACTGGATGAACAGTATATCCTCCCT

TATCTTTAAATATGAGGCATGGAGGGATATCTGTAGATTTAGCTATTTTTTCTTTACATTTAGCAGGGGCTTCTTCTATT

ATAGGGGCTGTAAATTTTATTACTACTATTATTAATATACAATTAATAGGATTAAAATTGGATAATATTAGTTTATTTGT

TTGATCAGTTTTAATTACGGCTATTTTATTATTATTATCTTTACCTGTTTTAGCAGGGGCAATTACAATATTATTAA-CA

GATCGTAATTTAAATACATCTTTTTTTGATCCTGCGGGT-GGGGGAGATCCAATTTTGTACCAGCATTTATTTTGATTTT

TTGG-------

>MN309820.1:187-668 Meteorus arizonensis isolate ANS572 cytochrome oxidase subunit I (COI) gene, partial cds; mitochondrial

GGAAATTGACTAATTCCTTTAATATTAGGGGCTCCTGATATAGCTTTCCCTCGAATAAATAATATAAGATTTTGATTATT

AATTCCTTCTATATTTTTTCTTCTTATAAGTAGAATAATTAATATGGGGGTAGGGACTGGATGAACAGTGTATCCTCCCT

TATCTTTAAATATGAGGCATGGAGGGATATCTGTAGATTTAGCTATTTTTTCTTTACATTTAGCAGGGGCTTCTTCTATT

ATAGGGGCTGTAAATTTTATTACTACTATTATTAATATACAATTAATAGGATTAAAATTGGATAATATTAGTTTATTTGT

TTGATCAGTTTTAATTACGGCTATTTTATTATTATTATCTTTACCTGTTTTAGCAGGGGCAATTACAATATTATTAA-CA

GATCGTAATTTAAATACATCTTTTTTTGATCCTGCGGGT-GGGGGAGATCCAATTTTGTACCAGCATTTATTTTGATTTT

TTGG-------

>HM423251.1:188-658 Meteorus sp. BOLD:ACE9478 voucher BIOUG<CAN>:09BBHYM-536 cytochrome oxidase subunit 1 (COI) gene, partial cds; mitochondrial

GGAAATTGATTAATTCCTTTAATATTAGGGGCCCCTGATATAGCTTTCCCTCGAATAAATAATATAAGATTTTGATTATT

AATTCCTTCTATATTTTTTCTTCTTATAAGTAGAATAGTTAATATGGGGGTAGGGACTGGATGAACAGTGTATCCTCCCT

TATCTTTAAATATGAGGCATGGAGGGATATCTGTAGATTTAGCTATTTTTTCTTTACATTTAGCAGGGGCTTCTTCTATT

ATAGGGGCTGTAAATTTTATTACTACTATTATTAATATACAATTAATAGGGTTAAAATTGGATAATATTAGTTTATTTGT

TTGATCAGTTTTAATTACGGCTATTTTATTATTATTATCTTTACCTGTTTTAGCAGGGGCAATTACAATATTATTAA-CA

GATCGTAATTTAAATACATCTTTTTTTGATCCTGCAGGT-GGGGGGGATCCAATTTTGTATCAGCATTTATTT-------

-----------

>JF793223.1:187-657 Meteorus sp. Janzen08 cytochrome oxidase subunit 1 (COI) gene, partial cds; mitochondrial

GGAAATTGATTAATTCCTTTAATATTAGGGGCTCCTGATATAGCTTTCCCTCGAATAAATAATATAAGATTTTGATTATT

AATTCCTTCTATATTTTTTCTTCTTATAAGTAGAATAATTAATATGGGGGTAGGGACTGGATGAACAGTATATCCTCCCT

TATCTTTAAATATGAGGCATGGAGGGATATCAGTAGATTTAGCTATTTTTTCTTTACATTTAGCAGGGGCATCTTCTATT

ATAGGGGCTGTAAATTTTATTACTACTATTATTAATATACAATTAATAGGATTAAAATTGGATAATATTAGTTTATTTGT

TTGATCAGTTTTAATTACGGCTATTTTATTATTATTATCTTTACCTGTTTTAGCAGGGGCAATTACAATATTATTAA-CA

GATCGTAATTTGAATACATCTTTTTTTGATCCTGCAGGT-GGGGGGGATCCAATTTTGTATCAGCATTTATTT-------

-----------

>KR795704.1:188-658 Meteorus sp. BOLD-2016 voucher BIOUG03407-A07 cytochrome oxidase subunit 1 (COI) gene, partial cds; mitochondrial

GGGAATTGATTAGTTCCTTTAATATTGGGGGCTCCTGATATAGCTTTCCCTCGTATAAATAATATAAGATTTTGATTATT

AATTCCTTCCATATTTTTTCTTCTTATAAGTAGAATAATTAATATGGGGGTAGGTACAGGATGAACAGTGTATCCTCCCT

TATCTTTAAATATGAGGCATGGAGGGATATCTGTAGATTTAGCTATTTTTTCTTTACATTTAGCAGGGGCTTCTTCTATT

ATAGGGGCTGTAAATTTTATTACTACTATTATTAATATACAATTAATAGGATTAAAATTGGATAATATTAGTTTATTTGT

TTGGTCAGTTTTAATTACAGCTATTTTATTATTATTATCTTTACCTGTTTTAGCAGGGGCTATTACAATATTATTAA-CA

GATCGAAATTTAAATACTTCTTTTTTTGATCCTGCAGGG-GGAGGGGATCCTATTTTGTATCAACATTTATTT-------

-----------

>KR796189.1:188-658 Meteorus sp. BOLD-2016 voucher BIOUG03123-G01 cytochrome oxidase subunit 1 (COI) gene, partial cds; mitochondrial

GGGAATTGATTAGTTCCTTTAATATTGGGGGCTCCTGATATAGCTTTCCCTCGTATAAATAATATAAGATTTTGATTATT

AATTCCTTCTATATTTTTTCTTCTTATAAGTAGAATAATTAATATGGGGGTAGGTACAGGATGAACAGTGTATCCTCCCT

TATCTTTAAATATGAGGCATGGAGGGATATCTGTAGATTTAGCTATTTTTTCTTTACATTTAGCAGGGGCTTCTTCTATT

ATAGGGGCTGTAAATTTTATTACTACTATTATTAATATACAATTAATAGGATTAAAATTGGATAATATTAGTTTATTTGT

TTGGTCAGTTTTAATTACAGCTATTTTATTATTATTATCTTTACCTGTTTTAGCAGGGGCTATTACAATATTATTAA-CA

GATCGAAATTTAAATACTTCTTTTTTTGATCCTGCAGGG-GGAGGGGATCCTATTTTGTATCAACATTTATTT-------

-----------

>KR878524.1:188-658 Meteorus sp. BOLD-2016 voucher 08BBHYM-0854 cytochrome oxidase subunit 1 (COI) gene, partial cds; mitochondrial

GGGAATTGATTAGTTCCTTTAATATTGGGGGCTCCTGATATAGCTTTCCCTCGTATAAATAATATAAGATTTTGATTATT

AATTCCTTCTATATTTTTTCTTCTTATAAGTAGAATAATTAATATGGGGGTAGGTACAGGATGAACAGTGTATCCTCCCT

TATCTCTAAATATGAGGCATGGAGGGATATCTGTAGATTTAGCTATTTTTTCTTTACATTTAGCAGGGGCTTCTTCTATT

ATAGGGGCTGTAAATTTTATTACTACTATTATTAATATACAATTAATAGGATTAAAATTGGATAATATTAGTTTATTTGT

TTGGTCAGTTTTAATTACAGCTATTTTATTATTATTATCTTTACCTGTTTTAGCAGGGGCTATTACAATATTATTAA-CA

GATCGAAATTTAAATACTTCTTTTTTTGATCCTGCAGGG-GGAGGGGATCCTATTTTGTATCAACATTTATTT-------

-----------

>HQ263916.1:188-658 Meteorus versicolor bio-material DNA21 cytochrome oxidase subunit 1 (COI) gene, partial cds; mitochondrial

GGAAATTGATTAATTCCTTTAATATTAGGGGCACCTGATATAGCATTCCCTCGAATAAATAATATAAGTTTTTGATTATT

AATCCCTTCAATATTTATATTATTAATAAGAATAATAATTAATATAGGGGTAGGTACTGGGTGAACAGTTTATCCTCCTT

TATCTTTAAATATAAGACACGGCGGAATATCTGTAGATTTAGCAATCTTTTCATTACATTTAGCTGGGGCTTCTTCTATT

ATAGGGGCTGTAAATTTTATTACTACTATTATTAATATACATTTATTTGGATTAAAATTAGATAATATTAGTTTATTTAT

TTGATCAGTTTTAATTACGGCAATTTTATTATTATTATCTTTACCTGTTTTAGCAGGAGCTATTACAATATTATTAA-CA

GATCGTAATTTAAATACTTCTTTTTTTGATCCTGCTGGG-GGAGGAGATCCTATTTTATATCAACATTTATTT-------

-----------

>HQ264009.1:188-658 Meteorus versicolor bio-material DNA128 cytochrome oxidase subunit 1 (COI) gene, partial cds; mitochondrial

GGAAATTGATTAATTCCTTTAATATTAGGGGCCCCTGATATAGCATTCCCTCGAATAAATAATATAAGTTTTTGATTATT

AATCCCTTCAATATTTATATTATTAATAAGAATAATAATTAATATAGGGGTAGGTACTGGGTGAACAGTTTATCCTCCTT

TATCTTTAAATATAAGACACGGCGGAATATCTGTAGATTTAGCAATCTTTTCATTACATTTAGCTGGGGCTTCTTCTATT

ATAGGGGCTGTAAATTTTATTACTACTATTATTAATATACATTTATTTGGATTAAAATTAGATAATATTAGTTTATTTAT

TTGATCAGTTTTAATTACGGCAATTTTATTATTATTATCTTTACCTGTTTTAGCAGGAGCTATTACAATATTATTAA-CA

GATCGTAATTTAAATACTTCTTTTTTTGATCCTGCTGGG-GGAGGAGATCCTATTTTATATCAACATTTATTT-------

-----------

>KR884719.1:188-658 Meteorus sp. BOLD-2016 voucher 08TTML-0237 cytochrome oxidase subunit 1 (COI) gene, partial cds; mitochondrial

GGAAATTGATTAATTCCTTTAATATTAGGGGCCCCTGATATAGCTTTTCCTCGAATAAACAATATAAGATTTTGATTATT

AATTCCTTCAATATTTTTATTGTTAATAAGAAGAATAATTAATATAGGAGTAGGAACAGGATGAACAGTTTATCCTCCCT

TATCTTTAAATATAAGTCATGGAGGAATATCTGTAGATTTGGCAATTTTTTCTTTACATTTAGCCGGAGCTTCTTCTATT

ATAGGAGCTGTAAATTTTATTACTACTATTATAAATATACATTTAATAGGATTAAAATTGGATAATATTAGGTTATTTAT

TTGATCAGTATTAATTACAGCAATTTTATTATTATTATCTTTACCTGTTTTAGCAGGAGCTATTACAATATTATTAA-CA

GATCGTAATTTAAACACTTCTTTTTTTGATCCTGCAGGG-GGGGGTGACCCTATTTTATATCAACATTTATTT-------

-----------

>HQ926648.1:188-658 Meteorus sp. Janzen13 cytochrome oxidase subunit 1 (COI) gene, partial cds; mitochondrial

GGGAATTGGTTAATTCCTTTAATATTAGGGGCTCCTGATATAGCTTTCCCTCGGATAAATAATATAAGATTTTGATTATT

AATTCCTTCAATATTAATATTATTAATAAGAAGAATAATTAATATAGGGGTAGGGACTGGGTGAACAGTTTATCCTCCTT

TGTCTTTAAATATAAGGCATGGGGGGATGTCTGTAGATTTAGCAATTTTTTCTTTACATTTAGCTGGGGCTTCTTCTATT

ATGGGTGCCATTAATTTTATTACTACTATTATAAATATACATTTAATAGGATTAAAATTAGATAATGTTACTTTATTTAT

TTGATCTGTTTTAATTACTGCTATTTTATTATTATTATCTTTACCAGTTTTAGCTGGTGCAATTACTATATTATTGA-CA

GATCGTAATTTAAATACATCTTTTTTTGACCCTGCTGGA-GGGGGGGACCCGATTTTATATCAACATTTATTT-------

-----------

>JF793227.1:187-657 Meteorus sp. Janzen13 cytochrome oxidase subunit 1 (COI) gene, partial cds; mitochondrial

GGGAATTGGTTAATTCCTTTAATATTAGGGGCTCCTGATATAGCTTTCCCTCGGATAAATAATATAAGATTTTGATTATT

AATTCCTTCAATATTAATATTATTAATAAGAAGAATAATTAATATAGGGGTAGGGACTGGGTGAACAGTTTATCCTCCTT

TGTCTTTAAATATAAGGCATGGGGGGATGTCTGTAGATTTAGCAATTTTTTCTTTACATTTAGCTGGGGCTTCCTCTATT

ATGGGTGCCATTAATTTTATTACTACTATTATAAATATACATTTAATAGGATTAAAATTAGATAATGTTACTTTATTTAT

TTGATCTGTTTTAATTACTGCTATTTTATTATTATTATCTTTACCAGTTTTAGCCGGTGCAATTACTATATTATTGA-CA

GATCGTAATTTAAATACATCTTTTTTTGACCCTGCTGGA-GGGGGGGACCCGATTTTATATCAACATTTATTT-------

-----------

>JF793233.1:187-657 Meteorus sp. Janzen24 cytochrome oxidase subunit 1 (COI) gene, partial cds; mitochondrial

GGGAATTGATTAATTCCTTTAATATTAGGGGCTCCTGATATAGCTTTCCCTCGAATAAATAATATAAGATTTTGATTATT

AGTTCCTTCTATATTTATATTATTAATAAGAAGGATAATTAATATAGGGGTAGGTACAGGGTGAACAGTATACCCTCCTT

TATCTTTAAATGTAAGTCATGGAGGTATATCGGTAGATTTTGCAATTTTTTCTTTACATTTAGCAGGAGCTTCTTCTATT

ATGGGAGCTATTAATTTTATTACTACTATTATTAATATACATTTAATGGGATTAAAATTAGATAATATTACTTTATTTAT

TTGATCTGTTTTAATTACTGCTATTTTATTATTGTTATCTTTACCAGTTTTAGCGGGAGCAATTACAATATTATTAA-CA

GATCGTAATTTAAATACTTCTTTCTTTGACCCTGCTGGT-GGGGGGGATCCTATTTTATATCAACATTTATTT-------

-----------

>JQ574848.1:188-658 Meteorus sp. Janzen31 cytochrome oxidase subunit 1 (COI) gene, partial cds; mitochondrial

GGTAATTGATTAATTCCTTTAATATTAGGGGCCCCTGATATAGCTTTCCCTCGAATAAATAATATAAGATTTTGATTATT

AATTCCTTCAATATTTATGTTATTAATAAGGAGAATAGTTAATATAGGGGCAGGGACAGGCTGAACAGTTTATCCTCCTT

TATCTTTGAATATAAGACACGGGGGGATATCTGTAGATTTGGCAATTTTTTCTTTACATTTAGCAGGGGCTTCTTCTATT

ATAGGAGCAATTAATTTTATTACAACTATTATTAATATGCATTTAATGGGATTAAAATTGGATAATATTACTTTATTTAT

TTGATCAGTTTTAATTACTGCAATTTTATTATTATTATCTTTACCTGTTTTAGCTGGTGCAATTACAATATTATTAA-CA

GATCGTAATTTAAATACTTCTTTTTTTGATCCAGCTGGG-GGAGGGGATCCTATTTTATATCAGCATTTATTT-------

-----------

>Hymenoptera_sp._HM434562.1:188-658 Hymenoptera sp. BOLD:AAB3999 cytochrome oxidase subunit 1 (COI) gene, partial cds; mitochondrial

GGTAATTGATTAGTTCCTTTAATATTAGGGGCTCCTGATATAGCATTTCCTCGAATGAATAATATAAGATTTTGATTATT

AATTCCTTCAATATTTATATTACTAATAAGAAGAATAATTAATATGGGAGTAGGAACAGGGTGAACTGTTTATCCTCCTT

TATCATTAAATATAAGTCATGGGGGGATATCTGTAGATTTAGCTATTTTTTCTTTACATTTAGCAGGAGCTTCTTCTATT

ATAGGGGCTGTTAATTTTATTACTACTATTATAAATATACAATATAATAGGGTTAAGTTAGATAATGTTACTTTATTTGT

TTGATCAGTTTTAATTACTGCAATTTTATTATTATTATCTTTACCTGTTTTAGCGGGGGCTATTACTATATTATTAA-CT

GATCGAAATTTAAATACTTCTTTTTTTGATCCTGCTGGA-GGGGGGGATCCTATTTTATATCAACATTTATTT-------

-----------

>HQ926263.1:188-658 Hymenoptera sp. BOLD:AAB3999 cytochrome oxidase subunit 1 (COI) gene, partial cds; mitochondrial

GGTAATTGATTAGTTCCTTTAATATTAGGGGCTCCTGATATAGCATTTCCTCGAATGAATAATATAAGATTTTGATTATT

AATTCCTTCAATATTTATATTACTAATAAGAAGAATAATTAATATGGGAGTAGGAACAGGGTGAACTGTTTATCCTCCTT

TATCATTAAATATAAGTCATGGGGGGATATCTGTAGATTTAGCTATTTTTTCTTTACATTTAGCAGGAGCTTCTTCTATT

ATAGGGGCTGTTAATTTTATTACTACTATTATAAATATACAATTAATAGGGTTAAAGTTAGATAATGTTACTTTATTTGT

TTGATCAGTTTTAATTACTGCAATTTTATTATTATTATCTTTACCTGTTTTAGCGGGGGCTATTACTATATTATTAA-CT

GATCGAAATTTAAATACTTCTTTTTTTGATCCTGCTGGA-GGGGGGGATCCTATTTTATATCAACATTTATTT-------

-----------

>HQ926879.1:145-615 Meteorus sp. Zitani01DHJ10 cytochrome oxidase subunit 1 (COI) gene, partial cds; mitochondrial

GGTAATTGATTAGTTCCTTTAATATTAGGGGCTCCTGATATAGCATTTCCTCGAATGAATAATATAAGATTTTGATTATT

AATTCCTTCAATATTTATATTACTAATAAGAAGAATAATTAATATGGGAGTAGGAACAGGGTGAACTGTTTATCCTCCTT

TATCATTAAATATAAGTCATGGGGGGATATCTGTAGATTTAGCTATTTTTTCTTTACATTTAGCAGGAGCTTCTTCTATT

ATAGGGGCTGTTAATTTTATTACTACTATTATAAATATACAATTAATAGGGTTAAAGTTAGATAATGTTACTTTATTTGT

TTGATCAGTTTTAATTACTGCAATTTTATTATTATTATCTTTACCTGTTTTAGCGGGGGCTATTACTATATTATTAA-CT

GATCGAAATTTAAATACTTCTTTTTTTGATCCTGCTGGA-GGGGGGGATCCTATTTTATATCAACATTTATTT-------

-----------

>HQ926880.1:161-631 Meteorus sp. Zitani01DHJ10 cytochrome oxidase subunit 1 (COI) gene, partial cds; mitochondrial

GGTAATTGATTAGTTCCTTTAATATTAGGGGCTCCTGATATAGCATTTCCTCGAATGAATAATATAAGATTTTGATTATT

AATTCCTTCAATATTTATATTACTAATAAGAAGAATAATTAATATGGGAGTAGGAACAGGGTGAACTGTTTATCCTCCTT

TATCATTAAATATAAGTCATGGGGGGATATCTGTAGATTTAGCTATTTTTTCTTTACATTTAGCAGGAGCTTCTTCTATT

ATAGGGGCTGTTAATTTTATTACTACTATTATAAATATACAATTAATAGGGTTAAAGTTAGATAATGTTACTTTATTTGT

TTGATCAGTTTTAATTACTGCAATTTTATTATTATTATCTTTACCTGTTTTAGCGGGGGCTATTACTATATTATTAA-CT

GATCGAAATTTAAATACTTCTTTTTTTGATCCTGCTGGA-GGGGGGGATCCTATTTTATATCAACATTTATTT-------

-----------

>HQ926265.1:188-658 Hymenoptera sp. BOLD:AAN2506 cytochrome oxidase subunit 1 (COI) gene, partial cds; mitochondrial

GGTAATTGGTTAGTTCCATTAATATTAGGGGCTCCGGACATAGCTTTCCCTCGAATAAATAATATAAGATTTTGATTATT

AATCCCTTCTATTTTATTATTATTAATAAGGAGAATAATTAATATAGGGGTGGGTACTGGATGAACAGTATATCCTCCTT

TATCATTAAATGTAAGTCATGGGGGAATATCCGTAGATTTAGCTATTTTTTCTTTACATTTAGCGGGGGCTTCTTCAATT

ATAGGGGCTATTAATTTTATTACTACTATTATAAATATACAATTAATAGGATTAAAATTAGATAATATTACTTTATTTAT

TTGATCAGTTTTAATTACTGCAATTTTATTATTATTATCTTTACCTGTATTAGCAGGGGCTATTACTATATTATTAA-CT

GATCGAAATTTAAATACTTCTTTTTTTGACCCTGCAGGA-GGGGGGGACCCAATTTTATATCAACATTTATTT-------

-----------

>KR791088.1:188-658 Meteorus sp. BOLD-2016 voucher BIOUG01281-G09 cytochrome oxidase subunit 1 (COI) gene, partial cds; mitochondrial

GGAAATTGATTAATTCCTTTAATATTAGGGGCTCCTGATATAGCATTTCCTCGAATAAATAATATAAGATTTTGATTATT

AATTCCTTCCTTATTTATATTGTTAATAAGTAGAATAATTAATATAGGAGTAGGGACTGGATGAACTGTTTATCCTCCTT

TATCTTTAAATATAAGACATGGTGGAATATCTGTAGATTTAGCAATTTTTTCTTTACATTTAGCTGGTATATCTTCTATT

ATAGGGGCTGTTAATTTTATTACAACTATTATTAATATACATTTAATAGGATTAAAATTAGATAATGTAACTTTATTTAT

TTGATCAGTTTTAATTACTGCATTATTATTATTATTATCATTACCAGTTTTAGCAGGAGCTATTACTATACTTTTAA-CA

GATCGAAATTTAAATACTTCTTTTTTTGATCCTGCTGGA-GGAGGAGATCCTATTTTATATCAACATTTATTT-------

-----------

>KR898264.1:188-658 Meteorus sp. BOLD-2016 voucher BIOUG05211-E07 cytochrome oxidase subunit 1 (COI) gene, partial cds; mitochondrial

GGAAATTGATTAATTCCTTTAATATTAGGAGCTCCTGATATAGCATTCCCTCGAATAAATAATATAAGATTTTGATTATT

GATTCCTTCTTTATTTATATTATTAATAAGTAGAATAATTAATATAGGAGTAGGGACTGGATGAACTGTTTACCCTCCTT

TATCTTTAAATATAAGACATGGAGGAATATCTGTAGACTTAGCTATTTTTTCTTTACATTTAGCTGGTATATCTTCTATT

ATAGGAGCTGTTAATTTTATTACAACTATTATTAATATACATTTAATAGGATTAAAATTAGATAATGTAACTTTATTTAT

TTGATCAGTTTTAATTACTGCATTATTATTATTATTATCATTACCAGTTTTAGCAGGAGCTATTACTATGCTTTTAA-CA

GATCGAAATTTAAATACTTCTTTTTTTGATCCTGCTGGA-GGAGGAGATCCTATTTTATATCAACATTTATTT-------

-----------

>HQ926882.1:150-620 Meteorus sp. Janzen23 cytochrome oxidase subunit 1 (COI) gene, partial cds; mitochondrial

GGGAATTGATTAATTCCTTTAATGTTAGGGGCTCCTGATATAGCTTTCCCACGAATAAATAATATAAGGTTTTGGTTATT

AATTCCATCTATATTTATATTATTAATAAGTAGAATAATTAATATAGGAGTCGGAACGGGTTGAACTGTTTATCCTCCTT

TGTCTTTAAGAATAAGTCATGGTGGAATATCTGTAGATTTAGCAATTTTTTCTTTACATTTAGCAGGAGTTTCATCAATT

ATAGGTGCTATTAATTTTATTACAACAATTATTAATATACATTTAATAGGTTTAAAATTAGACAATATTACTTTATTTAT

TTGATCTGTTTTAATTACTGCAATTTTATTATTATTATCTTTACCTGTATTAGCTGGAGCTATTACTATATTATTAA-CA

GATCGTAATTTAAATACTTCTTTTTTTGATCCTGCTGGA-GGGGGAGATCCTATTTTATACCAACATTTATTT-------

-----------

>JF793232.1:187-657 Meteorus sp. Janzen23 cytochrome oxidase subunit 1 (COI) gene, partial cds; mitochondrial

GGGAATTGATTAATTCCTTTAATGTTAGGGGCTCCTGATATAGCTTTCCCACGAATAAATAATATAAGGTTTTGGTTATT

AATTCCATCTATATTTATATTATTAATAAGTAGAATAATTAATATAGGAGTCGGAACGGGTTGAACTGTTTATCCTCCTT

TGTCTTTAAGAATAAGTCATGGTGGAATATCTGTAGATTTAGCAATTTTTTCTTTACATTTAGCAGGAGTTTCATCAATT

ATAGGTGCTATTAATTTTATTACAACAATTATTAATATACATTTAATAGGTTTAAAATTAGACAATATTACTTTATTTAT

TTGATCTGTTTTAATTACTGCAATTTTATTATTATTATCTTTACCTGTATTAGCTGGAGCTATTACTATATTATTAA-CA

GATCGTAATTTAAATACTTCTTTTTTTGATCCTGCTGGA-GGGGGAGATCCTATTTTATACCAACATTTATTT-------

-----------

>JQ575304.1:188-658 Meteorus sp. Janzen23 cytochrome oxidase subunit 1 (COI) gene, partial cds; mitochondrial

GGGAATTGATTAATTCCTTTAATGTTAGGGGCTCCTGATATAGCTTTCCCACGAATAAATAATATAAGGTTTTGGTTATT

AATTCCATCTATATTTATATTATTAATAAGTAGAATAATTAATATAGGAGTCGGAACGGGTTGAACTGTTTATCCTCCTT

TGTCTTTAAGAATAAGTCATGGTGGAATATCTGTAGATTTAGCAATTTTTTCTTTACATTTAGCAGGAGTTTCATCAATT

ATAGGTGCTATTAATTTTATTACAACAATTATTAATATACATTTAATAGGTTTAAAATTAGACAATATTACTTTATTTAT

TTGATCTGTTTTAATTACTGCAATTTTATTATTATTATCTTTACCTGTATTAGCTGGAGCTATTACTATATTATTAA-CA

GATCGTAATTTAAATACTTCTTTTTTTGATCCTGCTGGA-GGGGGAGATCCTATTTTATACCAACATTTATTT-------

-----------

>JQ575671.1:188-658 Meteorus sp. Janzen23 cytochrome oxidase subunit 1 (COI) gene, partial cds; mitochondrial

GGGAATTGATTAATTCCTTTAATGTTAGGGGCTCCTGATATAGCTTTCCCACGAATAAATAATATAAGGTTTTGGTTATT

AATTCCATCTATATTTATATTATTAATAAGTAGAATAATTAATATAGGAGTCGGAACGGGTTGAACTGTTTATCCTCCTT

TGTCTTTAAGAATAAGTCATGGTGGAATATCTGTAGATTTAGCAATTTTTTCTTTACATTTAGCAGGAGTTTCATCAATT

ATAGGTGCTATTAATTTTATTACAACAATTATTAATATACATTTAATAGGTTTAAAATTAGACAATATTACTTTATTTAT

TTGATCTGTTTTAATTACTGCAATTTTATTATTATTATCTTTACCTGTATTAGCTGGAGCTATTACTATATTATTAA-CA

GATCGTAATTTAAATACTTCTTTTTTTGATCCTGCTGGA-GGGGGAGATCCTATTTTATACCAACATTTATTT-------

-----------

>JQ575227.1:188-658 Meteorus sp. Janzen23 cytochrome oxidase subunit 1 (COI) gene, partial cds; mitochondrial

GGGAATTGATTAATTCCTTTAATGTTAGGGGCTCCTGATATAGCTTTCCCACGAATAAATAATATAAGGTTTTGGTTATT

AATTCCATCTATATTTATATTATTAATAAGTAGAATAATTAATATAGGAGTCGGAACGGGTTGAACTGTTTATCCTCCTT

TGTCTTTAAGAATAAGTCATGGTGGAATATCTGTAGATTTAGCAATTTTTTCTTTACATTTAGCAGGAGTTTCATCAATT

ATAGGTGCTATTAATTTTATTACAACAATTATTAATATACATTTAATAGGTTTAAAATTAGATAATATTACTTTATTTAT

TTGATCTGTTTTAATTACTGCAATTTTATTATTATTATCTTTACCTGTATTAGCTGGAGCTATTACTATATTATTAA-CA

GATCGTAATTTAAATACTTCTTTTTTTGATCCTGCTGGA-GGGGGAGATCCTATTTTATACCAACATTTATTT-------

-----------

>JF793235.1:187-657 Meteorus sp. Janzen28 cytochrome oxidase subunit 1 (COI) gene, partial cds; mitochondrial

GGAAATTGATTAATTCCTTTAATATTAGGTGCTCCTGATATAGCATTCCCGCGAATAAATAATATAAGATTTTGATTATT

AATTCCTTCTATATTTATATTATTAATAAGTAGAATAATTAATATTGGGGTAGGAACTGGTTGAACTGTATATCCTCCTT

TATCTTTAAATATAAGTCATGGAGGAATATCTGTAGATTTAGCAATTTTTTCTCTACATTTAGCAGGAGCTTCTTCAATT

ATGGGTGCTGTTAATTTTATTACAACTATTATTAATATACATTTGATGGGATTAAAGTTAGATAATATTACTTTATTTAT

TTGATCTGTTTTAATTACTGCTATTTTATTATTATTATCTTTACCTGTATTAGCTGGAGCTATTACTATATTATTAA-CG

GATCGTAATTTAAATACTTCTTTTTTTGATCCTGCAGGA-GGGGGGGATCCAATTTTATACCAACATTTATTT-------

-----------

>JQ575229.1:188-658 Meteorus sp. Zitani01DHJ04 cytochrome oxidase subunit 1 (COI) gene, partial cds; mitochondrial

GGAAATTGATTAATTCCTTTAATATTAGGTGCTCCTGATATAGCATTTCCACGTATAAATAATATAAGATTTTGATTATT

AATTCCTTCTATATTTATATTATTAATAAGTAGAATAATTAATATGGGGGTTGGGACTGGTTGAACTGTATATCCTCCTT

TATCTTTAACTATTAGTCATGGTGGAATATCTGTAGATTTAGCAATTTTTTCTTTACATTTAGCAGGAGCTTCATCAATT

ATAGGTGCTGTTAATTTTATTACAACTATTATTAATATACATTTAATGGGATTAAAGTTAGATAATATTACTTTATTAAT

TTGATCCATTTTAATTACTGCTATTTTATTATTACTATCTTTACCTGTATTAGCTGGGGCTATTACTATATTATTAA-CG

GATCGTAATTTAAATACTTCTTTTTTTGATCCTGCAGGA-GGGGGGGATCCTATTTTATACCAACATTTATTT-------

-----------

>JF793239.1:187-657 Meteorus sp. Zitani01DHJ05 cytochrome oxidase subunit 1 (COI) gene, partial cds; mitochondrial

GGAAATTGATTGATTCCTTTAATATTGGGTGCCCCTGATATAGCTTTCCCACGTATAAATAATATAAGGTTTTGGTTATT

AATTCCATCTATATTAATATTATTAATAAGTAGAATAATTAATATTGGGGTAGGAACTGGGTGAACTGTTTATCCACCTT

TATCTTTAAATGTAAGTCATGGAGGAATATCTGTGGATTTAGCAATTTTTTCTTTACATTTAGCAGGTGTTTCTTCAATT

ATAGGTGCTGTAAATTTTATTACAACAATTATTAATATACATTTATTAGGATTAAAATTAGATAATATTACTTTATTTAT

TTGATCTGTTTTAATTACTGCTATTTTATTATTATTATCATTACCTGTATTAGCTGGGGCTATTACTATATTGTTGA-CA

GATCGAAATTTAAATACTTCATTTTTTGATCCTGCAGGA-GGAGGAGATCCTATTTTATATCAACATTTATTT-------

-----------

>JQ575325.1:188-658 Meteorus sp. Zitani01DHJ08 cytochrome oxidase subunit 1 (COI) gene, partial cds; mitochondrial

GGAAATTGATTAATTCCTTTAATGTTAGGAGCTCCAGATATGGCATTTCCTCGAATAAATAATATAAGATTTTGATTATT

AATTCCTTCAATATTTATATTATTAATAAGGAGATTAATTAATATAGGAGTAGGAACTGGATGAACAGTTTATCCTCCTT

TATCTTTAAATATTAGTCATGGGGGGATATCTGTAGATTTAGCAATTTTTTCTTTACATTTAGCAGGGGTTTCTTCAATT

ATAGGGGCTGTAAATTTTATTACAACAATTATTAATATACATTTAATTGGTTTAAAATTGGATAATATTACTTTATTTAT

TTGATCTGTTTTAATTACTGCTATTTTGTTATTATTATCTTTACCTGTATTAGCTGGTGCTATTACTATATTATTAA-CA

GATCGAAATTTAAATACTTCATTTTTTGATCCTGCTGGA-GGAGGAGATCCTATTTTATATCAACATTTATTT-------

-----------

>JF793221.1:187-657 Meteorus sp. Janzen06 cytochrome oxidase subunit 1 (COI) gene, partial cds; mitochondrial

GGAAATTGATTAGTTCCTTTAATATTAGGAGCTCCAGATATAGCTTTCCCTCGAATAAATAATATGAGATTTTGATTATT

AATTCCTTCTTTATTAATATTATTAATAAGTAGATTTATTAATATAGGAGTAGGAACAGGATGAACAGTTTATCCTCCTT

TATCATTAAATATAAGTCATGGAGGTATATCAGTAGATTTGGCAATTTTTTCATTACATTTAGCAGGGGCTTCTTCAATT

ATAGGGGCAGTAAATTTTATTACTACAATTGTTAATATACATTTGATAGGATTAAAATTAGATAATATTACTTTATTTGT

TTGATCAGTTTTAATTACTGCAATTTTGTTATTATTATCATTACCTGTATTAGCTGGGGCTATTACAATATTATTAA-CA

GATCGAAATTTAAATACTTCTTTTTTTGATCCTGCTGGT-GGAGGTGATCCAATTTTATATCAACATTTATTT-------

-----------

>JQ574626.1:188-658 Meteorus sp. Janzen28 cytochrome oxidase subunit 1 (COI) gene, partial cds; mitochondrial

GGAAATTGATTAATTCCTTTAATGTTAGGGGCTCCTGATATAGCTTTTCCTCGAATAAATAATATGAGATTTTGATTATT

AATTCCTGCCATAATTATATTATTATTAAGAAGAGTAATTAATATAGGGGTAGGGACTGGGTGAACAGTTTATCCTCCCT

TATCTTTAAATGTGAGACATAGAGGTATATCTGTTGATATAGCTATTTTTTCTTTACATTTAGCAGGAGCTTCTTCTATT

ATGGGGGCTGTAAATTTTATTACTACTATTTTAAATATATATTTGATAGGATTAAAATTAGATAATGTTACTTTATTTAT

TTGATCTGTTTTATTAACAGCAATTTTATTATTATTATCTTTACCAGTTTTAGCTGGAGCAATTACAATATTATTAA-CT

GATCGTAATTTAAATACTTCTTTTTTTGATCCAGCTGGA-GGAGGAGATCCTATTTTATATCAACATTTATTT-------

-----------

>JF793229.1:187-657 Meteorus sp. Janzen15 cytochrome oxidase subunit 1 (COI) gene, partial cds; mitochondrial

GGAAATTGATTAATTCCTTTAATATTGGGAGCTCCAGATATAGCATTTCCTCGAATAAATAATATAAGATTTTGATTATT

AATTCCTTCTATTTTGTTATTATTAATAAGAAGAATAATTAATATAGGTGTAGGGACTGGATGAACTGTTTATCCTCCAT

TATCTTTGAATATAAGTCATGGGGGAATATCAGTAGATTTAGCAATTTTTTCTTTACATTTAGCTGGTGCTTCATCAATT

ATAGGTGCGGTTAATTTTATTACAACAATTATAAATATGTATTTAATTGGAATAAAATTAGATAATATTTCTTTATTTAT

TTGATCTGTTTTAATTACTGCAATTTTATTATTATTATCTTTACCTGTATTAGCAGGAGCAATTACTATACTTTTAA-CG

GATCGTAATTTAAATACATCTTTTTTTGATCCTGCTGGT-GGAGGTGATCCTATTTTATATCAACATTTATTT-------

-----------

>Euphorinae_sp._JN289444.1:188-658 Euphorinae sp. ASNUR169-11 voucher CCDB-07376 G02 cytochrome oxidase subunit 1 (COI) gene, partial cds; mitochondrial

GGTAATTGATTAATTCCTTTAATATTGGGAGCTCCAGATATAGCATTTCCTCGAATAAATAATATAAGATTTTGATTATT

AATTCCTTCAATTTTGTTATTATTAATAAGAAGAATAATTAATATAGGTGTAGGGACTGGTTGAACTGTTTATCCTCCAT

TATCTTTAAATATAAGTCATGGAGGAATATCAGTAGATTTAGCAATTTTTTCTTTACATTTAGCTGGTGCTTCTTCAATT

ATAGGAGCAGTTAATTTTATTACAACAATTATAAATATACATTTAATTGGGATAAAATTAGATAATATTTCTTTATTTAT

TTGATCTGTTTTAATTACTGCAATTTTATTATTATTATCTTTACCTGTATTAGCAGGAGCAATTACTATACTTTTAA-CG

GATCGTAATTTAAATACATCTTTTTTTGATCCTGCTGGT-GGAGGAGATCCAATTTTATATCAACATTTATTT-------

-----------

>MT784161.1:145-626 Meteorus sp. isolate UG_KUM_Met_0001 cytochrome c oxidase subunit I (COX1) gene, partial cds; mitochondrial

GGAAATTGATTAATTCCTTTAATATTAGGTGCTCCTGATATAGCATTTCCTCGAATAAATAATATAAGATTTTGATTATT

AATTCCTTCAATATTAATGTTATTAATAAGAAGAATAATTAATATAGGGGTTGGTACAGGATGGACTGTTTATCCTCCTT

TATCTTTAAATATAAGACATGGAGGTATATCAGTAGATTTAGCTATTTTTTCTTTACATTTAGCAGGTGCTTCTTCAATT

ATAGGAGCAGTAAATTTTATTACAACAATTATGAATATATATTTGATAGGATTAAAATTAGATAATATTAGGTTATTTAT

TTGATCAGTATTAATTACAGCAATTTTGTTATTATTATCATTACCAGTATTAGCAGGAGCTATTACTATATTATTAA-CT

GATCGGAATTTAAATACTTCATTTTTTGATCCTGCAGGG-GGAGGAGATCCTATTTTATATCAACATTTATTTTGATTTT

TTGG-------

>HQ264010.1:188-658 Meteorus pulchricornis bio-material DNA129 cytochrome oxidase subunit 1 (COI) gene, partial cds; mitochondrial

GGAAATTGATTGATTCCTTTAATATTAGGATCTCCTGATATGGCTTTCCCTCGTATAAATAATATAAGATTTTGATTATT

AGTTCCTTCTGTAATAATATTATTAATAAGAATAATTACTAATATAGGGGTAGGAACTGGTTGAACAGTTTATCCTCCTT

TATCATTAAATGTTAGTCATGGAGGTATATCAGTTGATTTAGCTATTTTTTCTTTACATTTAGCTGGGGCTTCTTCGATT

ATAGGAGCTGTAAATTTTATTACAACTATTATTAATATACATTTGATAGGTTTAAAATTAGATAATGTCAGATTATTTAT

TTGATCTGTTTTATTAACAGCTATTTTATTATTATTATCTTTACCAGTTTTAGCAGGGGCAATTACTATATTATTAA-CT

GATCGAAATTTAAATACTTCATTTTTTGACCCAGCAGGA-GGTGGAGATCCAATTTTATATCAACATTTGTTT-------

-----------

>MK736041.1:188-658 Meteorus pulchricornis cytochrome oxidase subunit I (COI) gene, partial cds; mitochondrial

GGAAATTGATTGATTCCTTTAATATTAGGATCTCCTGATATGGCTTTCCCTCGTATAAATAATATAAGATTTTGATTATT

AGTTCCTTCTGTAATAATATTATTAATAAGAATAATTACTAATATAGGGGTAGGAACTGGTTGAACAGTTTATCCTCCTT

TATCATTAAATGTTAGTCATGGAGGTATATCAGTTGATTTAGCTATTTTTTCTTTACATTTAGCTGGGGCTTCTTCGATT

ATAGGAGCTGTAAATTTTATTACAACTATTATTAATATACATTTGATAGGTTTAAAATTAGATAATGTCAGATTATTTAT

TTGATCTGTTTTATTAACAGCTATTTTATTATTATTATCTTTACCAGTTTTAGCAGGGGCAATTACTATATTATTAA-CT

GATCGAAATTTAAATACTTCATTTTTTGACCCAGCAGGA-GGTGGAGATCCAATTTTATATCAACATTTGTTT-------

-----------

>KX051778.1:188-658 Braconidae sp. sc_02692 cytochrome oxidase subunit 1 (COI) gene, partial cds; mitochondrial

GGAAATTGATTAATTCCTTTAATACTAGGAGCTCCTGATATGGCTTTTCCTCGTATAAATAATATAAGATTTTGATTATT

AGTTCCTTCTGTAATAATATTATTAATAAGAAGAATTACTAATATAGGGGTAGGAACTGGTTGAACAGTTTATCCTCCTT

TATCATTAAATGTTAGTCATGGTGGTATATCAGTTGATTTAGCTATTTTTTCTTTACATTTAGCTGGGGCTTCTTCGATT

ATAGGGGCTGTAAATTTTATTACAACTATTATTAATATACATTTGATAGGTTTAAAATTAGATAATATCAGATTATTTAT

TTGATCAGTTTTATTAACAGCTATTTTATTATTATTATCTTTACCAGTTTTAGCAGGGGCAATTACTATACTATTAA-CT

GATCGAAACTTAAATACTTCATTTTTTGATCCAGCTGGA-GGTGGAGATCCAATTTTATATCAACATTTGTTT-------

-----------

>LC467391.1:180-643 Meteorus pulchricornis CHIBAY_13_01 mitochondrial COX1 gene for cytochrome c oxidase subunit 1, partial cds

GGAAATTGATTAATTCCTTTAATACTAGGAGCTCCTGATATGGCTTTTCCTCGTATAAATAATATAAGATTTTGATTATT

AGTTCCTTCTGTAATAATATTATTAATAAGAAGAATTACTAATATAGGGGTAGGAACTGGTTGAACAGTTTATCCTCCTT

TATCATTAAATGTTAGTCATGGTGGTATATCAGTTGATTTAGCTATTTTTTCTTTACATTTAGCTGGGGCTTCTTCGATT

ATAGGGGCTGTAAATTTTATTACAACTATTATTAATATACATTTGATAGGTTTAAAATTAGATAATGTCAGATTATTTAT

TTGATCAGTTTTATTAACAGCTATTTTATTATTATTATCTTTACCAGTTTTAGCAGGGGCAATTACTATGCTATTAA-CT

GATCGAAACTTAAATACTTCATTTTTTGATCCAGCTGGA-GGTGGAGATCCAATTTTATATCAACA--------------

-----------

>LC467417.1:180-643 Meteorus pulchricornis KAGAWAZ_01_01 mitochondrial COX1 gene for cytochrome c oxidase subunit 1, partial cds

GGAAATTGATTAATTCCTTTAATACTAGGAGCTCCTGATATGGCTTTTCCTCGTATAAATAATATAAGATTTTGATTATT

AGTTCCTTCTGTAATAATATTATTAATAAGAAGAATTACTAATATAGGGGTAGGAACTGGTTGAACAGTTTATCCTCCTT

TATCATTAAATGTTAGTCATGGTGGTATATCAGTTGATTTAGCTATTTTTTCTTTACATTTAGCTGGGGCTTCTTCGATT

ATAGGGGCTGTAAATTTTATTACAACTATTATTAATATACATTTGATAGGTTTAAAATTAGATAATGTCAGATTATTTAT

TTGATCAGTTTTATTAACAGCTATTTTATTATTATTATCTTTACCAGTTTTAGCAGGGGCAATTACTATACTATTAA-CT

GATCGAAACTTAAATACTTCATTTTTTGATCCAGCTGGA-GGTGGAGATCCAATTTTATATCAACA--------------

-----------

>LC467474.1:180-643 Meteorus pulchricornis TSUSHIMA_02_02 mitochondrial COX1 gene for cytochrome c oxidase subunit 1, partial cds

GGAAATTGATTAATTCCTTTAATACTAGGAGCTCCTGATATGGCTTTTCCTCGTATAAATAATATAAGATTTTGATTATT

AGTTCCTTCTGTAATAATATTATTAATAAGAAGAATTACTAATATAGGGGTAGGAACTGGTTGAACAGTTTATCCTCCTT

TATCATTAAATGTTAGTCATGGTGGTATATCAGTTGATTTAGCTATTTTTTCTTTACATTTAGCTGGGGCTTCTTCGATT

ATAGGGGCTGTAAATTTTATTACAACTATTATTAATATACATTTGATAGGTTTAAAATTAGATAATGTCAGATTATTTAT

TTGATCAGTTTTATTAACAGCTATTTTATTATTATTATCTTTACCAGTTTTAGCAGGGGCAATTACTATACTATTAA-CT

GATCGAAACTTAAATACTTCATTTTTTGATCCAGCTGGA-GGTGGAGATCCAATTTTATATCAACA--------------

-----------

>LC467438.1:180-643 Meteorus pulchricornis KAGAWAT_11_31 mitochondrial COX1 gene for cytochrome c oxidase subunit 1, partial cds

GGAAATTGATTAATTCCTTTAATACTAGGAGCTCCTGATATGGCTTTTCCTCGTATAAATAATATAAGATTTTGATTATT

AGTTCCTTCTGTAATAATATTATTAATAAGAAGAATTACTAATATAGGGGTAGGAACTGGTTGAACAGTTTATCCTCCTT

TATCATTAAATGTTAGTCATGGTGGTATATCAGTTGATTTAGCTATTTTTTCTTTACATTTAGCTGGGGCTTCTTCGATT

ATAGGGGCTGTAAATTTTATTACAACTATTATTAATATACATTTGATAGGTTTAAAATTAGATAATGTCAGATTATTTAT

TTGATCAGTTTTATTAACAGCTATTTTATTATTATTATCTTTACCAGTTTTAGCAGGGGCAATTACTATACTATTAA-CT

GATCGAAANTTAAATACTTCATTTTTTGATCCAGCTGGA-GGTGGAGATCCAATTTTATATCAACA--------------

-----------

>LC467495.1:180-643 Meteorus pulchricornis IRIOMOTET_01 mitochondrial COX1 gene for cytochrome c oxidase subunit 1, partial cds

GGAAATTGATTAATTCCTTTAATACTAGGAGCTCCTGATATGGCTTTTCCTCGTATAAATAATATAAGATTTTGATTATT

AGTTCCTTCTGTAATAATATTATTAATAAGAAGAATTACTAATATAGGGGTAGGAACTGGTTGAACAGTTTATCCTCCTT

TATCATTAAATGTTAGTCATGGTGGTATATCAGTTGATTTAGCTATTTTTTCTTTACATTTAGCTGGGGCTTCTTCGATT

ATAGGGGCTGTAAATTTTATTACAACTATTATTAATATACATTTGATAGGTTTAAAATTAGATAATATCAGATTATTTAT

TTGATCAGTTTTATTAACAGCTATTTTATTATTATTATCTTTACCAGTTTTAGCAGGGGCAATTACTATACTATTGA-CT

GATCGAAACTTAAATACTTCATTTTTTGATCCAGCTGGA-GGTGGAGATCCAATTTTATATCAACA--------------

-----------

>LC467446.1:180-643 Meteorus pulchricornis KAGAWAT_11_39 mitochondrial COX1 gene for cytochrome c oxidase subunit 1, partial cds

GGAAATTGATTAATTCCTTTAATACTAGGAGCTCCTGATATGGCTTTTCCTCGTATAAATAATATAAGATTTTGATTATT

AGTTCCTTCTGTAATAATATTATTAATAAGAAGAATTANTAATATAGGGGTAGGAACTGGTTGAACAGTTTATCCTCCTT

TATCATTAAATGTTAGTCATGGTGGTATATCAGTTGATTTAGCTATTTTTTCTTTACATTTAGCTGGGGCTTCTTCGATT

ATAGGAGCTGTAAATTTTATTACAACTATTATTAATATACATTTGATAGGTTTAAAATTAGATAATGTCAGATTATTTAT

TTGATCAGTTTTATTAACAGCTATTTTATTATTATTATCTTTACCAGTTTTAGCAGGGGCAATTACTATGCTATTAA-CT

GATCGAAATTTAAATACTTCATTTTTTGATCCAGCTGGA-GGTGGAGATCCAATTTTATATCAACA--------------

-----------

>LC467480.1:180-643 Meteorus pulchricornis AMAMIA_11_01 mitochondrial COX1 gene for cytochrome c oxidase subunit 1, partial cds

GGAAATTGATTAATTCCTTTAATACTAGGAGCTCCTGATATGGCTTTTCCTCGTATAAATAATATAAGATTTTGATTATT

AGTTCCTTCTGTAATAATATTATTAATAAGAAGAATTATTAATATAGGGGTAGGAACTGGTTGAACAGTTTATCCTCCTT

TATCATTAAATGTTAGTCATGGTGGTATATCAGTTGATTTAGCTATTTTTTCTTTACATTTAGCTGGGGCTTCTTCGATT

ATAGGAGCTGTAAATTTTATTACAACTATTATTAATATACATTTGATAGGTTTAAAATTAGATAATGTCAGATTATTTAT

TTGATCAGTTTTATTAACAGCTATTTTATTATTATTATCTTTACCAGTTTTAGCAGGGGCAATTACTATGCTATTAA-CT

GATCGAAATTTAAATACTTCATTTTTTGATCCAGCTGGA-GGTGGAGATCCAATTTTATATCAACA--------------

-----------

>LC467473.1:180-643 Meteorus pulchricornis TSUSHIMA_02_01 mitochondrial COX1 gene for cytochrome c oxidase subunit 1, partial cds

GGAAATTGATTAATTCCTTTAATACTAGGAGCTCCTGATATGGCTTTTCCTCGTATAAATAATATAAGATTTTGATTATT

AGTTCCTTCTGTAATAATATTATTAATAAGAAGAATTATTAATATAGGGGTAGGAACTGGTTGAACAGTTTATCCTCCTT

TATCATTAAATGTTAGTCATGGTGGTATATCAGTTGATTTAGCTATTTTTTCTTTACATTTAGCTGGGGCTTCTTCGATT

ATAGGAGCTGTAAATTTTATTACAACTATTATTAATATACATTTGATAGGTTTAAAATTAGATAATGTCAGATTATTTAT

TTGATCAGTTTTATTAACAGCTATTTTATTATTATTATCTTTACCAGTTTTAGCAGGGGCAATTACTATGCTATTAA-CT

GATCGAAACTTAAATACTTCATTTTTTGATCCAGCTGGA-GGTGGAGATCCAATTTTATATCAACA--------------

-----------

>LC467497.1:180-643 Meteorus pulchricornis YONAGUNIY_12_01 mitochondrial COX1 gene for cytochrome c oxidase subunit 1, partial cds

GGAAATTGATTAATTCCTTTAATACTAGGAGCTCCTGATATGGCTTTTCCTCGTATAAATAATATAAGATTTTGATTATT

AGTTCCTTCTGTAATAATATTATTAATAAGAAGAATTACTAATATAGGGGTAGGAACTGGTTGAACAGTTTATCCTCCTT

TATCATTAAATGTTAGTCATGGTGGTATATCAGTTGATTTAGCTATTTTTTCTTTACATTTAGCTGCGGCTTCTTCGATT

ATAGGGGCTGTAAATTTTATTACAACTATTATTAATATACATTTGATAGGTTTAAAATTAGATAATATCAGATTATTTAT

TTGATCAGTTTTATTAACAGCTATTTTATTATTATTATCTTTACCAGTTTTAGCAGGGGCAATTACTATACTATTAA-CT

GATCGAAACTTAAATACTTCATTTTTTGATCCAGCTGGA-GGTGGAGATCCAATTTTATATCAACA--------------

-----------

>LC467494.1:180-643 Meteorus pulchricornis ISHIGAKII_12_02 mitochondrial COX1 gene for cytochrome c oxidase subunit 1, partial cds

GGAAATTGATTAATTCCTTTAATACTAGGAGCTCCTGATATGGCTTTTCCTCGTATAAATAATATAAGATTTTGATTATT

AGTTCCTTCTGTAATAATATTATTAATAAGAAGAATTATTAATATAGGGGTAGGAACTGGTTGAACAGTTTATCCTCCTT

TATCATTAAATGTTAGTCATGGTGGTATATCAGTTGATTTAGCTATTTTTTCTTTACATTTAGCTGGGGCTTCTTCGATT

ATAGGAGCTGTAAATTTTATTACAACTATTATTAATATACATTTGATAGGTTTAAAATTAGATAATGTCAGATTATTTAT

TTGATCAGTTTTATTAACAGCTATTTTATTATTATTATCTTTACCAGTTTTAGCAGGGGCAATTACTATGCTATTAA-CT

GATCGAAATTTAAATACTTCATTTTTTGATCCACCTGGA-GGTGGGGATCCAATTTTATATCAACA--------------

-----------

>NC_053259.1:1562-2043 Meteorus pulchricornis mitochondrion, complete genome

GGAAATTGATTAATTCCTTTAATACTAGGAGCTCCTGATATGGCTTTTCCTCGTATAAATAATATAAGATTTTGATTATT

AGTTCCTTCTGTAATAATATTATTAATAAGAAGAATTACTAATATAGGGGTAGGAACTGGTTGAACAGTTTATCCTCCTT

TATCATTAAATGTTAGTCATGGTGGTATATCAGTTGATTTAGCTATTTTTTCTTTACATTTAGCTGGGGCTTCTTCGATT

ATAGGGGCTGTAAATTTTATTACAACTATTATTAATATACATTTGATAGGTTTAAAATTAGATAATGTCAGATTATTTAT

TTGATCAGTTTTATTAACAGCTATTTTATTATTATTATCTTTACCAGTTTTAGCAGGGGCAATTACTATACTATTAA-CT

GATCGAAACTTAAATACTTCATTTTTTGATCCAGCTGGA-GGTGGAGATCCAATTTTATACCAACATTTGTTTTGATTTT

TTGG-------

>LC335979.1:180-643 Meteorus pulchricornis KGT_12_26_B mitochondrial COI gene for cytochrome oxidase subunit 1, partial cds

GGAAATTGGTTGATTCCTTTAATATTAGGAGCTCCTGATATGGCTTTCCCTCGTATAAATAATATAAGATTTTGATTATT

AGTTCCTTCTGTAATAATATTATTAATAAGAAGAATTACTAATATAGGGGTAGGAACTGGTTGAACAGTTTATCCTCCTT

TATCATTAAATGTTAGTCATGGTGGTATATCAGTTGATTTAGCTATTTTTTCTTTACATTTAGCCGGGGCTTCTTCAATT

ATAGGAGCTGTAAATTTTATTACAACTATTATTAATATACATTTGATAGGTTTAAAATTAGATAATGTTAGATTATTTAT

TTGATCTGTTTTATTAACAGCTATTTTATTATTATTATCTTTACCAGTTTTAGCAGGGGCAATTACTATACTCTTAA-CT

GATCGAAATTTAAATACTTCATTTTTTGATCCAGCGGGA-GGTGGAGATCCAATTTTATATCAACA--------------

-----------

>LC467461.1:180-643 Meteorus pulchricornis KAGAWAT_12_49 mitochondrial COX1 gene for cytochrome c oxidase subunit 1, partial cds

GGAAATTGGTTGATTCCTTTAATATTAGGAGCTCCTGATATGGCTTTCCCTCGTATAAATAATATAAGATTTTGATTATT

AGTTCCTTCTGTAATAATATTATTAATAAGAAGAATTACTAATATAGGGGTAGGAACTGGTTGAACAGTTTATCCTCCTT

TATCATTAAATGTTAGTCATGGTGGTATATCAGTTGATTTAGCTATTTTTTCTTTACATTTAGCCGGGGCTTCTTCAATT

ATAGGAGCTGTAAATTTTATTACAACTATTATTAATATACATTTGATAGGTTTAAAATTAGATAATGTTAGATTATTTAT

TTGATCTGTTTTATTAACAGTTATTTTATTATTATTATCTTTACCAGTTTTAGCAGGGGCAATTACTATACTCTTAA-CT

GATCGAAATTTAAATACTTCATTTTTTGATCCAGCGGGA-GGTGGAGATCCAATTTTATATCAACA--------------

-----------

>LC467463.1:180-643 Meteorus pulchricornis KAGAWAT_12_60 mitochondrial COX1 gene for cytochrome c oxidase subunit 1, partial cds

GGAAATTGGTTGATTCCTTTAATACTAGGAGCTCCTGATATGGCTTTCCCTCGTATAAATAATATAAGATTTTGATTATT

AGTTCCTTCTGTAATAATATTATTAATAAGAAGAATTACTAATATAGGGGTAGGAACTGGTTGAACAGTTTATCCTCCTT

TATCATTAAATGTTAGTCATGGTGGTATATCAGTTGATTTAGCTATTTTTTCTTTACATTTAGCCGGGGCTTCTTCAATT

ATAGGAGCTGTAAATTTTATTACAACTATTATTAATATACATTTGATAGGTTTAAAATTAGATAATGTTAGATTATTTAT

TTGATCTGTTTTATTAACAGCTATTTTATTATTATTATCTTTACCAGTTTTAGCAGGGGCAATTACTATACTCTTAA-CT

GATCGAAATTTAAATACTTCATTTTTTGATCCAGCGGGA-GGTGGAGATCCAATTTTATATCAACA--------------

-----------

>LC467444.1:180-643 Meteorus pulchricornis KAGAWAT_11_37 mitochondrial COX1 gene for cytochrome c oxidase subunit 1, partial cds

GGAAATTGGTTGATTCCTTTAATACTAGGAGCTCCTGATATGGCTTTCCCTCGTATAAATAATATAAGATTTTGATTATT

AGTTCCTTCTGTAATAATATTATTAATAAGAAGAATTACTAATATAGGGGTAGGAACTGGTTGAACAGTTTATCCTCCTT

TATCATTAAATGTTAGTCATGGTGGTATATCAGTTGATTTAGCTATTTTTTCTTTACATTTAGCCGGGGCTTCTTCAATT

ATAGGAGCTGTAAATTTTATTACAACTATTATTAATATACATTTGATAGGTTTAAAATTAGATAATGTTAGATTATTTAT

TTGATCTGTTTTATTAACAGCTATTTTATTATTATTATCTTTACCAGTTTTAGCAGGGGCAATTACTATACTTTTAA-CT

GATCGAAATTTAAATACTTCATTTTTTGATCCAGCGGGA-GGTGGAGATCCAATTTTATATCAACA--------------

-----------

>LC467450.1:180-643 Meteorus pulchricornis KAGAWAT_12_11 mitochondrial COX1 gene for cytochrome c oxidase subunit 1, partial cds

GGAAATTGGTTGATTCCTTTAATACTAGGAGCTCCTGATATGGCTTTCCCTCGTATAAATAATATAAGATTTTGATTATT

AGTTCCTTCTGTAATAATATTATTAATAAGAAGAATTACTAATATAGGGGTAGGAACTGGTTGAACAGTTTATCCTCCTT

TATCATTAAATGTTAGTCATGGTGGTATATCAGTTGATTTAGCTATTTTTTCTTTACATTTAGCTGGGGCTTCTTCAATT

ATAGGAGCTGTAAATTTTATTACAACTATTATTAATATACATTTGATAGGTTTAAAATTAGATAATGTTAGATTATTTAT

TTGATCTGTTTTATTAACAGCTATTTTATTATTATTATCTTTACCAGTTTTAGCAGGGGCAATTACTATACTTTTAA-CT

GATCGAAATTTAAATACTTCATTTTTTGATCCAGCGGGA-GGTGGAGATCCAATTTTATATCAACA--------------

-----------

>LC467455.1:180-643 Meteorus pulchricornis KAGAWAT_12_37 mitochondrial COX1 gene for cytochrome c oxidase subunit 1, partial cds

GGAAATTGGTTGATTCCTTTAATACTAGGAGCTCCTGATATGGCTTTCCCTCGTATAAATAATATAAGATTTTGATTATT

AGTTCCTTCTGTAATAATATTATTAATAAGAAGAATTACTAATATAGGGGTAGGAACTGGTTGAACAGTTTATCCTCCTT

TATCATTAAATGTTAGTCATGGTGGTATATCAGTTGATTTAGCTATTTTTTCTTTACATTTAGCCGGGGCTTCTTCAATT

ATAGGAGCTGTAAATTTTATTACAACTATTATTAATATACATTTGATAGGTTTAAAATTAGATAATGTTAGATTATTTAT

TTGATCTGTTTTATTAACAGCTATTTTATTATTATTATCTTTACCAGTTTTAGCAGGGGCAATTACTATACTCTTAA-CT

GATCGAAATTTAAATACTTCATTTTTTGATCCAGCGGGA-GGTGGAGATCCACTTTTATATCAACA--------------

-----------

>LC467393.1:180-643 Meteorus pulchricornis FUKUIO_13_01 mitochondrial COX1 gene for cytochrome c oxidase subunit 1, partial cds

GGAAATTGGTTGATTCCTTTAATATTAGGAGCTCCTGATATGGCTTTTCCTCGTATAAATAATATAAGATTTTGGTTATT

AGTTCCTTCTGTAATAATATTATTAATAAGAAGAATTACTAATATAGGGGTAGGAACTGGTTGAACAGTTTATCCTCCTT

TATCATTAAATGTTAGTCATGGTGGTATATCAGTTGATTTAGCTATTTTTTCTTTACATTTAGCCGGGGCTTCTTCAATT

ATAGGAGCTGTAAATTTTATTACAACTATTATTAATATACATTTGATAGGTTTAAAATTAGATAATGTTAGATTATTTAT

TTGATCTGTTTTATTAACAGCTATTTTATTATTATTATCTTTACCAGTTTTAGCAGGGGCAATTACTATACTCTTAA-CT

GATCGAAATTTAAATACTTCATTTTTTGATCCAGCGGGA-GGTGGAGATCCAATTTTATATCAACA--------------

-----------

>LC467423.1:180-643 Meteorus pulchricornis KAGAWAT_11_01 mitochondrial COX1 gene for cytochrome c oxidase subunit 1, partial cds

GGAAATTGGTTGATTCCTTTAATATTAGGAGCTCCTGATATGGCTTTCCCTCGTATAAATAATATAAGATTTTGATTATT

AGTTCCTTCGGTAATAATATTATTAATAAGAAGAATTACTAATATAGGGGTAGGAACTGGTTGAACAGTTTATCCTCCTT

TATCATTAAATGTTAGTCATGGTGGTATATCAGTTGATTTAGCTATTTTTTCTTTACATTTAGCCGGGGCTTCTTCAATT

ATAGGAGCTGTAAATTTTATTACAACTATTATTAATATACATTTGATAGGTTTAAAATTAGATAATGTTAGATTATTTAT

TTGATCTGTTTTATTAACAGCTATTTTATTATTATTATCTTTACCAGTTTTAGCAGGGGCAATTACTATACTCTTAA-CT

GATCGAAATTTAAATACTTCATTTTTTGATCCAGCGGGA-GGTGGAGATCCAATTTTATATCAACA--------------

-----------

>LC467462.1:180-643 Meteorus pulchricornis KAGAWAT_12_54 mitochondrial COX1 gene for cytochrome c oxidase subunit 1, partial cds

GGAAATTGGTTGATTCCTTTAATATTAGGAGCTCCTGATATGGCTTTCCCTCGTATAAATAATATAAGATTTTGATTATT

AGTTCCTTCGGTAATAATATTATTAATAAGAAGAATTACTAATATAGGGGTAGGAACTGGTTGAACAGTTTATCCTCCTT

TATCATTAAATGTTAGTCATGGTGGTATATCAGTTGATTTAGCTATTTTTTCTTTACATTTAGCCGGGGCTTCTTCAATT

ATAGGAGCTGTAAATTTTATTACAACTATTATTAATATACATTTGATAGGTTTAAAATTAGATAATGTTAGATTATTTAT

TTGATCTGTTTTATTAACAGCTATTTTATTATTATTATCTTTACCAGTTTTAGCAGGGGCAATTACTATACTCTTAA-CT

GATCGAAATTTAAATACTTCATTTTTTGATCCAGCGGGA-GGTGGAGATCCAATTTTATATCAACA--------------

-----------

>LC467433.1:180-643 Meteorus pulchricornis KAGAWAT_11_23 mitochondrial COX1 gene for cytochrome c oxidase subunit 1, partial cds

GGAAATTGGTTGATTCCTTTAATATTAGGAGCTCCTGATATGGCTTTCCCTCGTATAAATAATATAAGATTTTGATTATT

AGTTCCTTCTGTAATAATATTATTAATAAGAAGAATTACTAATATAGGAGTAGGAACTGGTTGAACAGTTTATCCTCCTT

TATCATTAAATGTTAGTCATGGTGGTATATCAGTTGATTTAGCTATTTTTTCTTTACATTTAGCCGGGGCTTCTTCAATT

ATAGGAGCTGTAAATTTTATTACAACTATTATTAATATACATTTGATAGGTTTAAAATTAGATAATGTTAGATTATTTAT

TTGATCTGTTTTATTAACAGCTATTTTATTATTATTATCTTTACCAGTTTTAGCAGGGGCAATTACTATACTTTTAA-CT

GATCGAAATTTAAATACTTCATTTTTTGATCCAGCGGGA-GGTGGAGATCCTATTTTATATCAACA--------------

-----------

>HQ552684.1:188-658 Meteorus sp. BBHYM626-10 voucher BIOUG<CAN>:08BBHYM-1670 cytochrome oxidase subunit 1 (COI) gene, partial cds; mitochondrial

GGAAATTGATTAATTCCTTTAATATTAGGAGCTCCTGATATAGCTTTCCCACGTATAAATAATATAAGATTTTGATTATT

GATTCCTGCAATTATATTATTGTTATTAAGAAGAATTGTAAATATAGGAGCTGGAACTGGATGAACTGTTTATCCTCCTT

TATCATTAAATATAAGTCATGGTGGGATATCAGTAGATTTTTCTATTTTTTCATTACATTTAGCTGGTGCTTCTTCTATT

ATAGGGGCTGTAAATTTTATTACAACTATTGTAAATATACATTTAATAGGATTAAAATTAGATAATTTAACTTTATTTAT

TTGATCAGTTTTATTAACAGCAATTTTATTATTATTATCTTTACCTGTTTTAGCAGGAGCTATTACTATATTACTTA-CT

GATCGAAATTTAAATACTTCATTTTTTGATCCTGCTGGG-GGGGGGGATCCTATTTTATATCAACATTTATTT-------

-----------

>KJ591466.1:188-658 Meteorus sp. JS10_00059 cytochrome oxidase subunit I (COI) gene, partial cds; mitochondrial

GGAAATTGATTAATTCCTTTAATATTAGGAGCCCCTGATATAGCTTTCCCGCGTATAAATAATATAAGATTTTGATTATT

AATTCCTGCAATTATATTATTGTTATTAAGAAGAATTGTAAATATAGGAGCTGGAACTGGATGAACTGTTTATCCTCCTT

TATCATTAAATATAAGTCATGGTGGGATATCAGTAGATTTTTCTATTTTTTCATTACATTTAGCTGGTGCTTCTTCTATT

ATAGGGGCTGTAAATTTTATTACAACTATTGTAAATATACATTTAATAGGATTAAAATTAGATAATTTAACCTTATTTAT

TTGATCAGTTTTATTAACAGCAATTTTATTATTATTATCTTTACCTGTTTTAGCAGGAGCTATTACTATATTACTTA-CT

GATCGAAATTTAAATACTTCATTTTTTGATCCTGCTGGG-GGGGGGGATCCTATTTTATATCAACATTTATTT-------

-----------

>HM435866.1:188-658 Meteorus sp. BBHEC218-09 voucher BIOUG<CAN>:09BBEHY-0218 cytochrome oxidase subunit 1 (COI) gene, partial cds; mitochondrial

GGAAATTGATTAATTCCTATAATATTAGGAGCTCCTGATATGGCATTCCCTCGAATGAATAATATGAGATTTTGATTATT

GATTCCTTCATTATTTTTACTTTTACTTAGGAGATTAGTTAATGTAGGGGCTGGGACAGGGTGAACAGTTTATCCTCCAC

TATCTTTAAATATTAGTCATGGAGGTATTTCTGTTGATTTAGCTATTTATTCTCTACATTTAGCCGGGGCTTCTTCAATT

ATAGGGGCTGTAAATTTTATTACTACTATTATTAATATACATTTAATAGGGTTAAATTTTGATGGGATTAGTTTATTTGT

TTGGTCAGTTTTAATTACTACTGTATTATTATTATTGTCTTTACCTGTTTTAGCGGGGGCTATTACAATATTGTTAA-CA

GATCGAAATTTAAATACTTCTTTTTTTGATCCTGCTGGA-GGGGGGGATCCTATTTTATATCAACATTTATTT-------

-----------

>HM435922.1:188-658 Meteorus sp. BBHEC286-09 voucher BIOUG<CAN>:09BBEHY-0286 cytochrome oxidase subunit 1 (COI) gene, partial cds; mitochondrial

GGAAATTGATTAATTCCTATAATATTAGGAGCTCCTGATATGGCATTCCCTCGAATGAATAATATGAGATTTTGATTATT

GATTCCTTCATTATTTTTACTTTTACTTAGGAGATTAGTTAATGTAGGGGCTGGGACAGGGTGAACAGTTTATCCTCCAC

TATCTTTAAATATTAGTCATGGAGGTATTTCTGTTGATTTAGCTATTTATTCTCTACATTTAGCCGGGGCTTCTTCAATT

ATAGGGGCTGTAAATTTTATTACTACTATTATTAATATACATTTAATAGGGTTAAATTTTGATGGGATTAGTTTATTTGT

TTGGTCAGTTTTAATTACTACTGTATTATTATTATTGTCTTTACCTGTTTTAGCGGGGGCTATTACAATATTGTTAA-CA

GATCGAAATTTAAATACTTCTTTTTTTGATCCTGCTGGA-GGGGGGGATCCTATTTTATATCAACATTTATTT-------

-----------

>KR884161.1:188-658 Meteorus sp. BOLD-2016 voucher BIOUG06008-D09 cytochrome oxidase subunit 1 (COI) gene, partial cds; mitochondrial

GGAAATTGATTAATTCCTATAATATTAGGAGCTCCTGATATGGCATTCCCTCGAATGAATAATATGAGATTTTGATTATT

GATTCCTTCATTATTTTTACTTTTACTTAGGAGATTAGTTAATGTAGGAGCTGGGACAGGGTGAACAGTTTATCCTCCAC

TATCTTTAAATATTAGTCATGGAGGTATTTCTGTTGATTTAGCTATTTATTCTCTACATTTAGCCGGGGCTTCTTCAATT

ATAGGGGCTGTAAATTTTATTACTACTATTATTAATATACATTTAATAGGGTTAAATTTTGATGGGATTAGTTTATTTGT

TTGGTCAGTTTTAATTACTACTGTATTATTATTATTGTCTTTACCTGTTTTAGCGGGGGCTATTACAATATTGTTAA-CA

GATCGAAATTTAAATACTTCTTTTTTTGATCCTGCTGGA-GGGGGGGATCCTATTTTATATCAACATTTATTT-------

-----------

>KR797578.1:188-658 Meteorus sp. BOLD-2016 voucher BIOUG01688-A12 cytochrome oxidase subunit 1 (COI) gene, partial cds; mitochondrial

GGAAATTGATTAATTCCTATAATATTAGGAGCTCCTGATATGGCATTCCCTCGAATGAATAATATGAGATTTTGATTATT

GATTCCTTCATTATTTTTACTTTTACTTAGGAGATTAGTTAATGTAGGGGCTGGGACAGGGTGAACAGTTTATCCTCCAC

TATCTTTAAATATTAGTCATGGAGGTATTTCTGTTGATTTAGCTATTTATTCTCTACATTTAGCTGGGGCTTCTTCAATT

ATAGGGGCTGTAAATTTTATTACTACTATTATTAATATACATTTAATAGGGTTAAATTTTGATGGAATTAGTTTATTTGT

TTGGTCAGTTTTAATTACTACTGTATTATTATTATTGTCTTTACCTGTTTTAGCGGGGGCTATTACAATATTGTTAA-CA

GATCGAAATTTAAATACTTCTTTTTTTGATCCTGCTGGA-GGGGGGGATCCTATTTTATATCAACATTTATTT-------

-----------

>KR897968.1:188-658 Meteorus sp. BOLD-2016 voucher BIOUG06655-G08 cytochrome oxidase subunit 1 (COI) gene, partial cds; mitochondrial

GGAAATTGATTAATTCCTATAATATTAGGAGCTCCTGATATGGCATTCCCTCGAATGAATAATATGAGATTTTGATTATT

GATTCCTTCATTATTTTTACTTTTACTTAGGAGATTAGTTAATGTAGGGGCTGGGACAGGGTGAACAGTTTATCCTCCAC

TATCTTTAAATATTAGTCATGGAGGTATTTCTGTTGATTTAGCTATTTATTCTCTACATTTAGCCGGGGCTTCTTCAATT

ATAGGGGCTGTAAATTTTATTACTACTATTATTAATATACATTTAATAGGGTTAAATTTTGATGGGATTAGTTTATTTGT

TTGGTCAGTTTTAATTACTACTGTATTATTATTATTGTCTTTACCTGTTTTAGCGGGGGCTATTACAATATTGTTAA-CA

GATCGAAATTTAAATCCTTCTTTTTTTGATCCTGCTGGA-GGGGGGGATCCTATTTTATATCAACATTTATTT-------

-----------

>KR883799.1:188-658 Meteorus sp. BOLD-2016 voucher BIOUG05941-B01 cytochrome oxidase subunit 1 (COI) gene, partial cds; mitochondrial

GGAAATTGATTAATTCCTGTAATATTAGGAGCTCCTGATATGGCATTCCCTCGAATGAATAATATGAGATTTTGATTATT

GATTCCTTCATTATTTTTACTTTTATTTAGGAGATTAGTTAATGTAGGGGCTGGGACAGGGTGAACAGTTTATCCTCCAC

TATCTTTAAATATTAGTCATGGAGGTATTTCTGTTGATTTAGCTATTTATTCTTTACATTTAGCCGGGGCTTCTTCAATT

ATAGGGGCTGTAAATTTTATTACTACTATTATTAATATACATTTAATAGGGTTAAATTTTGATGGGATTAGTTTATTTGT

TTGGTCAGTTTTAATTACTACTGTATTACTATTATTGTCTTTACCTGTTTTAGCGGGGGCTATTACAATATTGTTAA-CA

GATCGAAATTTAAATACTTCTTTTTTTGATCCTGCTGGA-GGGGGGGATCCTATTTTATATCAACATTTATTT-------

-----------

>HQ263930.1:188-658 Meteorus micropterus bio-material DNA36 cytochrome oxidase subunit 1 (COI) gene, partial cds; mitochondrial

GGAAATTGGTTAATTCCTTTAATATTAGGATCTCCTGATATAGCATTTCCTCGAATAAATAATATAAGGTTTTGATTATT

AATTCCTTCTTTATTTTTATTAATAATAAGAGGATTAATTAATGTTGGGGTGGGTACAGGTTGAACTGTTTATCCTCCAT

TATCTTTAAATGTTAGTCATAGTGGTATATCAGTTGATATAGCTATTTTTTCTTTACATTTAGCTGGTATTTCATCTATT

ATGGGTGCTGTAAATTTTATTTCTACAATTTTGAATATATGTTTATTGGGATTAAAATTTGATAATATTTCTTTATTTTG

TTGATCTGTTATAATTACAGCTATTTTATTATTATTATCATTACCTGTTTTAGCAGGTGCTATTACAATATTATTGA-CT

GATCGTAATTTGAATACTTCTTTTTTTGATCCTGCTGGA-GGGGGGGATCCTATTTTATATCAACATTTATTT-------

-----------

>HQ263920.1:188-658 Meteorus colon bio-material DNA25 cytochrome oxidase subunit 1 (COI) gene, partial cds; mitochondrial

GGAAATTGATTAGTTCCTTTAATATTAGGGGCTCCTGATATAGCTTTCCCTCGAATAAATAATATAAGTTTTTGGTTATT

AATCCCTTCATTAATGATGTTAATATTAAGAAGAGTAATAAATATGGGGGCAGGGACTGGTTGAACCGTTTATCCTCCAT

TATCTCTAAATATAAGACATGGGGGTATATCAGTTGATTTAGCTATTTTTTCTTTACATTTAGCTGGGGCCTCTTCAATT

ATAGGGGCAATTAATTTTATTACAACAATTATAAATATAAAATTAAATGGTTTAAATTTTGATAATATAAGTTTATTTAT

TTGATCTTTATTAATTACTGCTGTATTATTATTATTATCCTTACCAGTATTAGCTGGAGCCATTACAATATTATTAA-CA

GATCGAAATTTAAATACTTCTTTTTTTGATCCAATTGGA-GGGGGGGATCCAATTTTATATCAACATTTATTT-------

-----------

>HQ263952.1:188-658 Meteorus colon bio-material DNA60 cytochrome oxidase subunit 1 (COI) gene, partial cds; mitochondrial

GGAAATTGATTAGTTCCTTTAATATTAGGGGCTCCTGATATAGCTTTCCCTCGAATAAATAATATAAGTTTTTGGTTATT

AATCCCTTCATTAATGATGTTAATATTAAGAAGAGTAATAAATATGGGGGCAGGGACTGGTTGAACCGTTTATCCTCCAT

TATCTCTAAATATAAGACATGGGGGTATATCAGTTGATTTAGCTATTTTTTCTTTACATTTAGCTGGGGCCTCTTCAATT

ATAGGGGCAATTAATTTTATTACAACAATTATAAATATAAAATTAAATGGTTTAAATTTTGATAATATAAGTTTATTTAT

TTGATCTTTATTAATTACTGCTGTATTATTATTATTATCCTTACCAGTATTAGCTGGAGCAATTACAATATTATTAA-CA

GATCGAAATTTAAATACTTCTTTTTTTGATCCAATTGGA-GGGGGGGATCCAATTTTATATCAACATTTATTT-------

-----------

>HM396930.1:188-658 Peristenus dayi voucher CBRA0394 cytochrome oxidase subunit 1 (COI) gene, partial cds; mitochondrial

GGAAATTGATTAATTCCTTTAATACTTGGAGCCCCTGATATAGCTTTCCCTCGAATAAATAATATAAGATTTTGGTTATT

ACCTCCTTCTTTAATAATATTATTAATGAGAAGAATAATTGGGTTAGGGGCTGGTACGGGATGAACGGTTTATCCTCCGT

TATCTTTGAATATAAGACATTCTAGGATATCAGTAGATTTAGCTATTTTTTCTTTACATTTAGCTGGAATTTCTTCGATT

ATAGGGGCAGTTAATTTTATTACTACAGTTTTAAATATACGTTTAATAGGATTGAAAATAGATAATATTTCTTTATTTGT

TTGATCTGTAAATATTACTGCTTTGTTATTATTATTATCTTTACCTGTTTTAGCGGGGGCAATTACTATGTTATTAA-CA

GATCGAAATTTAAATACTTCTTTTTTTGATCCAGCTGGG-GGGGGAGACCCAATTTTATACCAACATTTGTTT-------

-----------

>HM396936.1:188-658 Peristenus dayi voucher CBRA0400 cytochrome oxidase subunit 1 (COI) gene, partial cds; mitochondrial

GGAAATTGATTAATTCCTTTAATACTTGGAGCCCCTGATATAGCTTTCCCTCGAATAAATAATATAAGATTTTGGTTATT

ACCTCCTTCTTTAATAATATTATTAATGAGAAGAATAATTGGGTTAGGGGCTGGTACGGGATGAACGGTTTATCCTCCGT

TATCTTTGAATATAAGACATTCTAGGATATCAGTAGATTTAGCTATTTTTTCTTTACATTTAGCTGGAATTTCTTCGATT

ATAGGGGCAGTTAATTTTATTACTACAGTTTTAAATATACGTTTAATAGGATTGAAAATAGATAATATTTCTTTATTTGT

TTGATCTGTAAATATTACTGCTTTGTTATTATTATTATCTTTACCTGTTTTAGCGGGGGCAATTACTATGTTATTAA-CA

GATCGAAATTTAAATACTTCTTTTTTTGATCCAGCTGGG-GGGGGGGACCCAATTTTATACCAACATTTGTTT-------

-----------

>HQ972328.1:188-658 Peristenus sp. BOLD:AAA8464 voucher BIOUG<CAN>:09PROBE-A0171 cytochrome oxidase subunit 1 (COI) gene, partial cds; mitochondrial

GGAAATTGATTAATTCCTTTAATACTGGGAGCCCCTGATATAGCTTTCCCTCGAATAAATAATATAAGATTTTGGTTATT

ACCTCCTTCTTTAATAATATTATTAATAAGAAGAATAATTGGGTTAGGGGCTGGTACGGGATGAACGGTTTATCCTCCGT

TATCTTTGAATATAAGACATTCTAGGATATCAGTAGATTTAGCTATTTTTTCTTTACATTTAGCTGGAATTTCTTCGATT

ATAGGGGCAGTTAATTTTATTACTACAGTTTTAAATATACGTTTAATAGGATTGAAAATAGATAATATTTCTTTATTTGT

TTGATCTGTAAATATTACTGCTTTGTTATTGTTATTATCTTTACCTGTTTTAGCGGGGGCAATTACTATGTTATTAA-CA

GATCGAAATTTAAATACTTCTTTTTTTGATCCAGCTGGG-GGGGGAGACCCAATTTTATATCAACATTTGTTT-------

-----------

>JX831340.1:187-657 Peristenus sp. BOLD:AAA8464 voucher 07PROBE-24222 cytochrome oxidase subunit 1 (COI) gene, partial cds; mitochondrial

GGAAATTGATTAATTCCTTTAATACTGGGAGCCCCTGATATAGCTTTCCCTCGAATAAATAATATAAGATTTTGGTTATT

ACCTCCTTCTTTAATAATATTATTAATAAGAAGAATAATTGGGTTAGGGGCTGGTACGGGATGAACGGTTTATCCTCCGT

TATCTTTGAATATAAGACATTCTAGGATATCAGTAGATTTAGCTATTTTTTCTTTACATTTAGCTGGAATTTCTTCGATT

ATAGGGGCAGTTAATTTTATTACTACAGTTTTAAATATACGTTTAATAGGATTGAAAATAGATAATATTTCTTTATTTGT

TTGATCTGTAAATATTACTGCTTTGTTATTGTTATTATCTTTACCTGTTTTAGCGGGGGCAATTACTATGTTATTAA-CA

GATCGAAATTTAAATACTTCTTTTTTTGATCCAGCTGGG-GGGGGAGACCCAATTTTATATCAACATTTGTTT-------

-----------

>HQ972372.1:188-658 Peristenus sp. BOLD:AAA8464 voucher BIOUG<CAN>:09PROBE-A0246 cytochrome oxidase subunit 1 (COI) gene, partial cds; mitochondrial

GGAAATTGATTAATTCCTTTAATACTGGGAGCCCCTGATATAGCTTTCCCTCGAATAAATAATATAAGATTTTGGTTATT

ACCTCCTTCTTTAATAATATTATTAATAAGAAGAATAATTGGGTTAGGGGCTGGTACGGGATGAACGGTTTATCCTCCGT

TATCTTTGAATATAAGACATTCTAGGATATCAGTAGATTTAGCTATTTTTTCTTTACATTTAGCTGGAATTTCTTCGATT

ATAGGGGCAGTTAATTTTATTACTACAGTTTTAAATATACGTTTAATAGGATTGAAAATAGATAATATTTCTTTATTTGT

TTGATCTGTAAATATTACTGCTTTGTTATTGTTATTATCTTTACCTGTTTTAGCGGGGGCAATTACTATGTTATTAA-CA

GATCGAAATTTAAATACTTCTTTTTTTGATCCAGCGGGG-GGGGGAGACCCAATTTTATATCAACATTTGTTT-------

-----------

>HM396944.1:188-658 Peristenus dayi voucher CBRA0412 cytochrome oxidase subunit 1 (COI) gene, partial cds; mitochondrial

GGAAACTGATTAATTCCTTTAATACTTGGAGCCCCTGATATAGCTTTCCCCCGAATAAATAATATAAGATTTTGGTTATT

ACCTCCTTCTTTAATAATATTATTAATAAGAAGAATAATTGGGTTAGGGGCTGGTACGGGGTGAACAGTTTATCCCCCGT

TATCTTTGAATATAAGACATTCTAGAATATCAGTAGATTTAGCTATTTTTTCTTTACATTTAGCTGGGGTTTCTTCAATT

ATAGGTGCAGTTAATTTTATTACTACAGTTTTAAATATACGTTTAATAGGATTGAAAATAGATAATATTTCTTTATTTGT

TTGATCTGTAAATATTACTGCTTTGTTATTATTATTATCTTTACCTGTTTTAGCGGGGGCAATTACTATGTTATTAA-CA

GATCGAAATTTAAATACTTCTTTTTTTGACCCAGCTGGG-GGGGGAGATCCAATTTTATATCAACATTTGTTT-------

-----------

>HM396962.1:155-625 Peristenus dayi voucher CBRA0433 cytochrome oxidase subunit 1 (COI) gene, partial cds; mitochondrial

GGAAACTGATTAATTCCTTTAATACTTGGAGCCCCTGATATAGCTTTCCCCCGAATAAATAATATAAGATTTTGGTTATT

ACCTCCTTCTTTAATAATATTATTAATAAGAAGAATAATTGGGTTAGGGGCTGGTACGGGGTGAACAGTTTATCCCCCGT

TATCTTTGAATATAAGACATTCTAGAATATCAGTAGATTTAGCTATTTTTTCTTTACATTTAGCTGGGGTTTCTTCAATT

ATAGGTGCAGTTAATTTTATTACTACAGTTTTAAATATACGTTTAATAGGATTGAAAATAGATAATATTTCTTTATTTGT

TTGATCTGTAAATATTACTGCTTTGTTATTATTATTATCTTTACCTGTTTTAGCGGGGGCAATTACTATGTTATTAA-CA

GATCGAAATTTAAATACTTCTTTTTTTGACCCAGCTGGG-GGGGGAGATCCAATTTTATATCAACATTTGTTT-------

-----------

>HM396950.1:150-620 Peristenus dayi voucher CBRA0421 cytochrome oxidase subunit 1 (COI) gene, partial cds; mitochondrial

GGAAACTGATTAATTCCTTTAATACTTGGAGCTCCTGATATAGCTTTCCCCCGAATAAATAATATAAGATTTTGGTTATT

ACCTCCTTCTTTAATAATATTATTAATAAGAAGAATAATTGGGTTAGGGGCTGGTACGGGGTGAACAGTTTATCCTCCGT

TATCTTTGAATATAAGACATTCTAGAATATCAGTAGATTTAGCTATTTTTTCTTTACATTTAGCTGGGGTTTCTTCAATT

ATAGGTGCAGTTAATTTTATTACTACAGTTTTAAATATACGTTTAATAGGATTGAAAATAGATAATATTTCTTTATTTGT

TTGATCTGTAAATATTACTGCTTTGTTATTATTATTATCTTTACCTGTTTTAGCGGGGGCAATTACTATGTTATTAA-CA

GATCGAAATTTAAATACTTCTTTTTTTGACCCAGCTGGG-GGGGGAGATCCAATTTTATATCAACATTTGTTT-------

-----------

>HM396955.1:188-658 Peristenus dayi voucher CBRA0426 cytochrome oxidase subunit 1 (COI) gene, partial cds; mitochondrial

GGAAACTGATTAATTCCTTTAATACTTGGAGCTCCTGATATAGCTTTCCCCCGAATAAATAATATAAGATTTTGGTTATT

ACCTCCTTCTTTAATAATATTATTAATAAGAAGAATAATTGGGTTAGGGGCTGGTACGGGGTGAACAGTTTATCCTCCGT

TATCTTTGAATATAAGACATTCTAGAATATCAGTAGATTTAGCTATTTTTTCTTTACATTTAGCTGGGGTTTCTTCAATT

ATAGGTGCAGTTAATTTTATTACTACAGTTTTAAATATACGTTTAATAGGATTGAAAATAGATAATATTTCTTTATTTGT

TTGATCTGTAAATATTACTGCTTTGTTATTATTATTATCTTTACCTGTTTTAGCGGGGGCAATTACTATGTTATTAA-CA

GATCGAAATTTAAATACTTCTTTTTTTGACCCAGCTGGG-GGGGGAGATCCAATTTTATATCAACATTTGTTT-------

-----------

>HM396953.1:188-658 Peristenus dayi voucher CBRA0424 cytochrome oxidase subunit 1 (COI) gene, partial cds; mitochondrial

GGAAACTGATTAATTCCTTTAATACTTGGAGCTCCTGATATAGCTTTCCCCCGAATAAATAATATAAGATTTTGGTTATT

ACCTCCTTCTTTAATAATATTATTAATAAGAAGAATAATTGGGTTAGGGGCTGGTACGGGGTGAACAGTTTATCCTCCGT

TATCTTTGAATATAAGACATTCTAGAATATCAGTAGATTTAGTTATTTTTTCTTTACATTTAGCTGGGGTTTCTTCAATT

ATAGGTGCAGTTAATTTTATTACTACAGTTTTAAATATACGTTTAATAGGATTGAAAATAGATAATATTTCTTTATTTGT

TTGATCTGTAAATATTACTGCTTTGTTATTATTATTATCTTTACCTGTTTTAGCGGGGGCAATTACTATGTTATTAA-CA

GATCGAAATTTAAATACTTCTTTTTTTGACCCAGCTGGG-GGGGGAGATCCAATTTTATATCAACATTTGTTT-------

-----------

>KR803613.1:188-658 Peristenus sp. BOLD-2016 voucher BIOUG03328-E11 cytochrome oxidase subunit 1 (COI) gene, partial cds; mitochondrial

GGAAATTGATTAATTCCTTTAATACTTGGAGCTCCTGATATAGCTTTTCCTCGAATAAATAATATAAGATTTTGGTTATT

ACCCCCTTCTTTAACAATATTATTAATAAGAAGAATAATTGGATTAGGGGCTGGTACAGGATGAACAGTTTATCCTCCAT

TATCTTTGAATATAAGACATTCTAGAATATCAGTAGATTTAGCTATTTTTTCTTTACATTTAGCCGGGATTTCTTCAATT

ATAGGGGCAGTTAATTTTATTACTACAGGTTTAAATATACGTTTAATAGGATTGAAAATAGATAATATTTCTTTATTTGT

TTGATCTGTAAATATTACTGCTTTATTATTATTATTATCTTTACCTGTTTTAGCGGGGGCAATTACTATATTACTAA-CA

GATCGAAATTTAAATACTTCTTTTTTTGATCCAGCTGGA-GGGGGGGACCCAATTTTATATCAACATTTGTTT-------

-----------

>MF930520.1:173-643 Peristenus sp. BIOUG20902-D10 cytochrome oxidase subunit 1 (COI) gene, partial cds; mitochondrial

GGAAATTGATTAATTCCTTTAATACTTGGAGCTCCTGATATAGCTTTCCCTCGAATAAATAATATAAGATTTTGGTTATT

ACCTCCTTCTTTAACAATATTATTAATAAGAAGAATAATTGGATTAGGGGCTGGTACAGGATGAACAGTTTATCCCCCAT

TATCTTTGAATATAAGACATTCTAGAATATCAGTAGATTTAGCTATTTTTTCTTTACATTTAGCCGGGATTTCTTCAATT

ATAGGGGCAGTTAATTTTATTACTACAGGTTTAAATATACGTTTAATAGGATTGAAAATAGATAATATTTCTTTATTTGT

TTGATCTGTAAATATTACTGCTTTATTATTATTATTATCTTTACCTGTTTTAGCGGGGGCAATTACTATATTACTAA-CA

GATCGAAATTTAAATACTTCTTTTTTTGATCCAGCTGGA-GGGGGGGACCCAATTTTATATCAACATTTGTTT-------

-----------

>KJ591488.1:188-658 Peristenus sp. 3 JMS-2015 voucher AB020 cytochrome oxidase subunit I (COI) gene, partial cds; mitochondrial

GGTAATTGATTAATTCCTTTAATATTAGGAGCCCCAGATATAGCCTTCCCACGGATAAATAATATGAGATTTTGATTACT

TCCCCCTTCTTTAATAATATTATTAATAAGAAGAATAATTGGATTAGGAGCTGGGACTGGATGAACAGTTTATCCCCCCC

TATCTTTAAATATAAGACATTCTAGAATATCGGTAGATTTGGCTATTTTTTCTTTACATTTAGCTGGAATTTCTTCAATT

ATAGGGGCTATTAATTTTATTACTACAGTTTTGAATATACGTTTAATAGGATTAAAAATAGATAATATTTCTTTATTTAT

TTGATCAGTTAATATTACTGCATTATTATTATTATTGTCTTTGCCTGTCTTAGCGGGAGCAATTACAATATTATTAA-CA

GATCGAAATTTAAATACTTCATTTTTTGATCCGGCTGGT-GGGGGGGATCCAATTTTATATCAACATTTATTT-------

-----------

>MF933304.1:188-658 Peristenus sp. BIOUG20085-C01 cytochrome oxidase subunit 1 (COI) gene, partial cds; mitochondrial

GGTAATTGGTTAATTCCTTTAATATTAGGAGCCCCAGATATAGCTTTCCCACGGATAAATAATATGAGATTTTGATTACT

TCCTCCTTCTTTAATAATATTATTAATAAGAAGAATAATTGGATTAGGAGCTGGGACTGGATGAACAGTTTATCCCCCCT

TATCTTTAAATATAAGACATTCTAGAATATCGGTAGATTTGGCTATTTTTTCTTTACATTTAGCTGGAATTTCTTCAATT

ATAGGGGCTATTAATTTTATTACTACAGTTTTGAATATACGTTTAATAGGATTAAAAATAGATAATATTTCTTTATTTAT

TTGATCAGTTAATATTACTGCATTATTATTATTATTGTCTTTGCCTGTCTTAGCGGGAGCAATTACAATATTATTAA-CA

GATCGAAATTTAAATACTTCATTTTTTGATCCGGCTGGT-GGGGGAGATCCAATTTTATATCAACATTTATTT-------

-----------

>KY683590.1:142-612 Peristenus mellipes voucher CBRA0442 cytochrome oxidase subunit 1 (COI) gene, partial cds; mitochondrial

GGAAATTGGTTAATTCCGTTAATATTAGGAGCNCCAGATATAGCTTTTCCACGGATAAATAATATAAGATTTTGGTTACT

TCCCCCTTCTTTAATAATATTATTAATAAGAAGAATAATTGGGTTAGGAGCTGGAACCGGATGAACAGTTTATCCTCCTT

TATCTTTAAATATAAGACATTCTAGAATATCGGTAGATTTAGCTATTTTTTCTTTACATTTAGCTGGGATTTCTTCAATT

ATAGGGGCGATTAATTTTATTACTACGGTTTTGAATATACGTTTAATAGGATTAAAAATAGATAATATTTCTTTATTTAT

TTGATCAGTTAATATTACTGCATTATTATTATTATTATCATTGCCTGTTTTAGCAGGGGCAATTACAATATTATTAA-CA

GATCGAAACTTAAATACTTCATTTTTTGATCCAGCTGGT-GGGGGGGANCCAATTTTATATCAACATTTATTT-------

-----------

>MG439752.1:188-658 Peristenus sp. BIOUG21982-B06 cytochrome oxidase subunit 1 (COI) gene, partial cds; mitochondrial

GGAAATTGGTTAATTCCTTTAATATTAGGGGCCCCAGATATAGCTTTCCCACGGATAAATAATATAAGATTTTGATTACT

TCCTCCTTCTTTAATAATATTATTAATAAGAAGAATAATTGGGTTAGGAGCTGGTACGGGATGAACAGTTTATCCTCCCT

TATCTTTAAATATAAGACATTCTAGAATATCGGTAGATTTAGCTATTTTTTCTTTACATTTAGCTGGGATTTCTTCAATT

ATAGGGGCTATTAATTTTATTACTACGGTTTTGAATATACGTTTAATAGGGTTAAAAATAGATAATATTTCTTTATTTAT

TTGATCAGTTAATATTACTGCATTATTATTATTATTATCATTACCTGTTTTAGCAGGGGCAATTACAATATTATTGA-CA

GATCGAAATTTAAATACTTCATTTTTTGATCCGGCTGGT-GGGGGGGACCCAATTTTGTATCAACATTTATTT-------

-----------

>MG944365.1:198-675 Peristenus howardi isolate YMZ247 cytochrome oxidase subunit I (COI) gene, partial cds; mitochondrial

GGAAATTGGTTAATTCCCTTAATATTAGGAGCCCCAGATATAGCTTTCCCACGGATAAATAATATAAGATTTTGGTTGCT

TCCTCCTTCTTTAATAATATTACTAATAAGAAGAATAATTGGGTTAGGAGCTGGAACGGGGTGAACAGTTTATCCTCCTT

TATCTTTAAATATAAGACATTCTAGAATATCGGTAGATTTAGCTATTTTTTCTTTACATTTAGCTGGAATTTCTTCAATT

ATAGGGGCTATTAATTTTATTACTACGGTTTTAAATATACGTTTAATAGGGTTAAAAATAGATAATATTTCTTTATTTAT

TTGATCAGTTAATATTACTGCATTATTATTATTATTATCATTGCCTGTTTTAGCAGGAGCAATTACAATATTATTAA-CA

GATCGAAATTTAAATACTTCATTTTTTGATCCGGCTGGA-GGGGGGGATCCAATTTTATATCAACATTTATTTTGATTTT

-----------

>MG944372.1:198-675 Peristenus howardi isolate YMZ264 cytochrome oxidase subunit I (COI) gene, partial cds; mitochondrial

GGAAATTGGTTAATTCCCTTAATATTAGGAGCCCCAGATATAGCTTTCCCACGGATAAATAATATAAGATTTTGGTTGCT

TCCTCCTTCTTTAATAATATTATTAATAAGAAGAATAATTGGGTTAGGAGCTGGAACGGGGTGAACAGTTTATCCTCCTT

TATCTTTAAATATAAGACATTCTAGAATATCGGTAGATTTAGCTATTTTTTCTTTACATTTAGCTGGAATTTCTTCAATT

ATAGGGGCTATTAATTTTATTACTACGGTTTTAAATATACGTTTAATGGGGTTAAAAATAGATAATATTTCTTTATTTAT

TTGATCAGTTAATATTACTGCATTATTATTATTATTATCATTGCCTGTTTTAGCAGGAGCAATTACAATATTATTAA-CA

GATCGAAATCTAAATACTTCATTTTTTGATCCGGCTGGA-GGGGGGGATCCAATTTTATATCAACATTTATTTTGATTTT

-----------

>MG944373.1:198-675 Peristenus howardi isolate YMZ265 cytochrome oxidase subunit I (COI) gene, partial cds; mitochondrial

GGAAATTGGTTAATTCCCTTAATATTAGGAGCCCCAGATATAGCTTTCCCACGGATAAATAATATAAGATTTTGGTTGCT

TCCTCCTTCTTTAATAATATTATTAATAAGAAGAATAATTGGGTTAGGAGCTGGAACGGGGTGAACAGTTTATCCTCCTT

TATCTTTAAATATAAGACATTCTAGAATATCGGTAGATTTAGCTATTTTTTCTTTACATTTAGCTGGAATTTCTTCAATT

ATAGGGGCTATTAATTTTATTACTACGGTTTTAAATATACGTTTAATAGGGTTAAAAATAGATAATATTTCTTTATTTAT

TTGATCAGTTAATATTACTGCATTATTATTATTATTATCATTGCCTGTTTTAGCAGGAGCAATTACAATATTATTAA-CA

GATCGAAATCTAAATACTTCATTTTTTGATCCGGCTGGA-GGGGGGGATCCAATTTTATATCAACATTTATTTTGATTTT

-----------

>MG944374.1:198-675 Peristenus howardi isolate YMZ267 cytochrome oxidase subunit I (COI) gene, partial cds; mitochondrial

GGAAATTGGTTAATTCCCTTAATATTAGGAGCCCCAGATATAGCTTTCCCACGGATAAATAATATAAGATTTTGGTTGCT

TCCTCCTTCTTTAATAATATTATTAATAAGAAGAATAATTGGGTTAGGAGCTGGAACGGGGTGAACAGTTTATCCTCCTT

TATCTTTAAATATAAGACATTCTAGAATATCGGTAGATTTAGCTATTTTTTCTTTACATTTAGCTGGAATTTCTTCAATT

ATAGGGGCTATTAATTTTATTACTACGGTTTTAAATATACGTTTAATAGGGTTAAAAATAGATAATATTTCTTTATTTAT

TTGATCAGTTAATATTACTGCATTATTATTATTATTATCATTGCCTGTTTTAGCAGGAGCAATTACAATATTATTAA-CA

GATCGAAATCTAAATACTTCATTTTTTGATCCGGCTGGA-GGGGGGGATCCAATTTTATATCAACATTTATTTTGATTTT

-----------

>MG944385.1:196-673 Peristenus howardi isolate YMZ325 cytochrome oxidase subunit I (COI) gene, partial cds; mitochondrial

GGAAATTGGTTAATTCCCTTAATATTAGGAGCCCCAGATATAGCTTTCCCACGGATAAATAATATAAGATTTTGGTTGCT

TCCTCCTTCTTTAATAATATTATTAATAAGAAGAATAATTGGGTTAGGAGCTGGAACGGGGTGAACAGTTTATCCTCCTT

TATCTTTAAATATAAGACATTCTAGAATATCGGTAGATTTAGCTATTTTTTCTTTACATTTAGCTGGAATTTCTTCAATT

ATAGGGGCTATTAATTTTATTACTACGGTTTTAAATATACGTTTAATGGGGTTAAAAATAGATAATATTTCTTTATTTAT

TTGATCAGTTAATATTACTGCATTATTATTATTATTATCATTGCCTGTTTTAGCAGGAGCAATTACAATATTATTAA-CA

GATCGAAATCTAAATACTTCAATTTTTGATCCGGCTGGA-GGGGGGGATCCAATTTTATATCAACATTTATTTTGATTTT

-----------

>MG944384.1:179-655 Peristenus howardi isolate YMZ323 cytochrome oxidase subunit I (COI) gene, partial cds; mitochondrial

GGAAATTGGTTAATTCCCTTAATATTAGGAGCCCCAGATATAGCTTTCCCACGGATAAATAATATAAGATTTTGGTTGCT

TCCTCCTTCTTTAATAATATTATTAATAAGAAGAATAATTGGGTTAGGAGCTGGAACGGGGTGAACAGTTTATCCTCCTT

TATCTTTAAATATAAGACATTCTAGAATATCGGTAGATTTAGCTATTTTTTCTTTACATTTAGCTGGAATTTCTTCAATT

ATAGGGGCTATTAATTTTATTACTACGGTTTTAAATATACGTTTAATAGGGTTAAAAATAGATAATATTTCTTTATTTAT

TTGATCAGTTAATATTACTGCATTATTATTATTATTATCATTGCCTGTTTTAGCAGGAGCAATTACAATATTATTAA-CA

GATCGAAATCTAAATACTTCATTTTTTGATCCGGCTGGA-GGGGGGGATCCAATTTTATATCAACATTTATTTTGATTT-

-----------

>MG944371.1:198-676 Peristenus howardi isolate YMZ263 cytochrome oxidase subunit I (COI) gene, partial cds; mitochondrial

GGAAATTGGTTAATTCCCTTAATATTAGGAGCCCCAGATATAGCTTTCCCACGGATAAATAATATAAGATTTTGGTTGCT

TCCTCCTTCTTTAATAATATTATTAATAAGAAGAATAATTGGGTTAGGAGCTGGAACGGGGTGAACAGTTTATCCTCCTT

TATCTTTAAATATAAGACATTCTAGAATATCGGTAGATTTAGCTATTTTTTCTTTACATTTAGCTGGAATTTCTTCAATT

ATAGGGGCTATTAATTTTATTACTACGGTTTTAAATATACGTTTAATAGGGTTAAAAATAGATAATATTTCTTTATTTAT

TTGATCAGTTAATATTACTGCATTATTATTATTATTATCATTGCCTGTTTTAGCAGGAGCAATTACAATATTATTAA-CA

GATCGAAATCTAAATACTTCATTTTTTGATCCGGCTGGAGGGGGGGGATCCAATTTTATATCAACATTTATTTTGATTTT

-----------

>MG944376.1:198-676 Peristenus howardi isolate YMZ270 cytochrome oxidase subunit I (COI) gene, partial cds; mitochondrial

GGAAATTGGTTAATTCCCTTAATATTAGGAGCCCCAGATATAGCTTTCCCACGGATAAATAATATAAGATTTTGGTTGCT

TCCTCCTTCTTTAATAATATTATTAATAAGAAGAATAATTGGGTTAGGAGCTGGAACGGGGTGAACAGTTTATCCTCCTT

TATCTTTAAATATAAGACATTCTAGAATATCGGTAGATTTAGCTATTTTTTCTTTACATTTAGCTGGAATTTCTTCAATT

ATAGGGGCTATTAATTTTATTACTACGGTTTTAAATATACGTTTAATAGGGTTAAAAATAGATAATATTTCTTTATTTAT

TTGATCAGTTAATATTACTGCATTATTATTATTATTATCATTGCCTGTTTTAGCAGGAGCAATTACAATATTATTAACCA

GATCGAAATCTAAATACTTCATTTTTTGATCCGGCTGGA-GGGGGGGATCCAATTTTATATCAACATTTATTTTGATTTT

-----------

>MG944370.1:198-675 Peristenus mellipes isolate YMZ252 cytochrome oxidase subunit I (COI) gene, partial cds; mitochondrial

GGAAATTGGTTAATTCCTTTAATATTAGGAGCTCCAGATATAGCTTTCCCACGGATAAATAATATAAGATTTTGGTTACT

TCCCCCCTCTTTAATAATATTATTAATAAGAAGAATAATTGGGTTAGGAGCTGGAACTGGATGAACAGTTTATCCCCCTT

TATCTTTAAATATAAGACATTCTAGAATATCGGTAGATTTAGCTATTTTTTCTTTACATTTAGCTGGAATTTCTTCAATT

ATAGGGGCTATTAATTTTATTACTACGGTTTTGAATATACGTTTAATAGGGTTAAAAATAGATAATATTTCTTTATTTAT

TTGATCAGTTAATATTACTGCATTATTATTATTATTATCATTGCCTGTTTTAGCAGGAGCAATTACAATATTATTAA-CA

GATCGAAACTTAAATACTTCATTTTTTGATCCGGCTGGC-GGGGGAGATCCAATTTTATATCAACATTTATTTTGATTTT

-----------

>KR786322.1:165-635 Euphorinae sp. BOLD-2016 voucher 32-5-321 cytochrome oxidase subunit 1 (COI) gene, partial cds; mitochondrial

GGAAATTGATTAATCCCTTTAATATTAGGAGCTCCAGATATAGCTTTTCCACGTATAAATAATATAAGATTTTGGTTACT

TCCTCCTTCTTTAATAATATTATTAATAAGAAGAATAATTGGATTAGGGGCTGGAACGGGGTGAACAGTTTATCCCCCCT

TATCTTTAAGTATAAGACATTCTAGAATATCGGTAGATTTAGCTATTTTTTCTTTACATTTAGCTGGAATTTCTTCAATT

ATAGGTGCTATTAATTTTATTACTACGGTTTTGAATATACGTTTAATAGGATTAAAGATAGATAATATTTCTTTATTTAT

TTGATCAGTTAACATTACTGCATTATTATTATTATTATCATTACCTGTTTTAGCGGGAGCAATTACAATATTNTTAA-CG

GATCGAAATTTAAATACTTCATTTTTTGATCCGGCTGGT-GGGGGGGATCCTATTTTATATCAACATTTATTT-------

-----------

>KR809409.1:154-624 Leiophron sp. BR-2015 cytochrome oxidase subunit 1 gene, partial cds; mitochondrial

GGAAATTGATTAGTTCCTTTAATAATAGGGGCCCCAGATATAGCTTTCCCTCGAATAAATAATATAAGATTTTGATTATT

ACCTCCCTCTTTAATTTTATTATTAATAAGGAGAATTATTGGGTTAGGGGCTGGAACTGGATGAACTGTTTACCCTCCAT

TATCTTTAAATGTAAGGCATTCAAGGATATCAGTTGATTTAGCTATTTTTTCTTTACATTTGGCAGGTATATCTTCTATT

ATAGGGGCAGTAAATTTTATTTCAACTGTTTTTAACATACAATTAAAAGGTTTAAAAATAGATAATATTCCTTTATTTGT

TTGATCTGTAAATATTACAGCTTTATTATTATTATTATCATTACCAGTTTTAGCGGGGGCTATTACAATATTATTAA-CA

GATCGAAATTTGAATACTTCTTTTTTTGATCCTGCTGGA-GGGGGGGATCCTATTTTATATCAACATTTATTT-------

-----------

>KJ591454.1:188-658 Leiophron sp. JS10_00247 cytochrome oxidase subunit I (COI) gene, partial cds; mitochondrial

GGAAATTGGTTAATTCCTTTAATAATAGGAGCTCCTGATATGGCTTTCCCTCGAATAAATAATATAAGATTTTGGCTTTT

ACCCCCTTCTTTATTTTTATTGTTATTAAGAAGATTAATAGGGGTAGGGGCAGGTACAGGATGAACTGTTTACCCTCCTT

TATCATTAAATTTAAGTCATTCTGGTATATCCGTAGATTTAGCTATTTTTTCTTTACATTTAGCTGGGATATCTTCTATT

ATAGGTGCTATTAATTTTATTTCTACTATTTTAAATATACGTTTATTAGGAATAAAAATAGATAATATTTCTTTATTTAT

TTGATCAGTTAATATTACGGCGGTATTATTGTTATTATCCTTACCAGTTTTAGCTGGGGCTATTACTATATTATTAA-CT

GATCGAAATTTAAATACAAGATTTTTTGATCCATCTGGA-GGTGGGGATCCAATTTTATATCAGCATTTATTT-------

-----------

>MF936861.1:188-658 Leiophron sp. BIOUG21116-C07 cytochrome oxidase subunit 1 (COI) gene, partial cds; mitochondrial

GGTAATTGATTGGTTCCTTTAATAATAGGAGCTCCAGATATAGCTTTTCCACGAATAAATAATATAAGATTTTGATTATT

ACCTCCATCTTTAATTTTATTATTATTAAGTAGAATAATAGGGTTAGGAGCAGGTACAGGTTGAACTGTTTATCCTCCTT

TATCATTAAATTTAAGTCATTCTAGTATATCTGTTGATTTTGCTATTTTTTCTTTACATATAGCTGGAGCATCTTCAATT

ATAGGGGCAATTAATTTTATTTCTACTGTATTTAATATACGTTTATTAGGATTAAAGATAGATAATATTTCTTTATTTAT

TTGATCTGTTAATATTACAGCATTATTATTATTATTATCTTTACCTGTTTTAGCAGGAGCTATTACTATATTATTAA-CA

GATCGAAATTTAAATACAAGATTTTTTGATCCATCAGGA-GGGGGGGATCCTATTTTATATCAGCATTTATTT-------

-----------

>KJ591455.1:188-658 Leiophron sp. 1 JMS-2015 voucher JS068 cytochrome oxidase subunit I (COI) gene, partial cds; mitochondrial

GGAAATTGGTTAATTCCTTTAATAATAGGGGCTCCTGATATAGCTTTTCCTCGAATGAATAATATAAGATTTTGATTGTT

ACCACCTTCATTATTTTTATTATTATTAAGAAGAATTATAGGGGCAGGGGCAGGTACAGGATGAACAGTTTATCCTCCTT

TATCTTTAAATTTAAGTCATTCTGGATTATCTGTTGATTTAGCAATTTTTTCTTTACATATAGCAGGTATATCTTCAATT

ATGGGAGCAATTAATTTTATTTCAACTATTTTAAATATACGTTTATTAGGGTTAAAAATAGATAATATTTCTTTATTTAC

TTGATCTGTTAATATTACTGCAATTTTGCTTTTATTATCATTACCTGTTTTAGCGGGTGCTATTACTATACTATTAA-CT

GATCGAAATTTAAATACAAGTTTTTTTGATCCTTCAGGT-GGGGGTGATCCTATTTTATATCAACATTTATTT-------

-----------

>KJ591456.1:188-658 Leiophron sp. 6 JMS-2015 voucher JS120 cytochrome oxidase subunit I (COI) gene, partial cds; mitochondrial

GGTAATTGATTAATTCCTTTAATAATAGGTTCACCTGATATAGCTTTCCCTCGAATAAATAATATAAGATTTTGGTTGTT

GCCTCCTTCATTATTTTTATTATTATTAAGAAGAATAATAGGAATAGGGGCGGGTACAGGTTGAACAGTTTATCCTCCTT

TATCTTTAAATTTAAGTCATTCAGGGATATCTGTTGATTTAGCAATTTTTTCTCTTCATTTAGCTGGTATATCTTCTATT

ATAGGGGCAATTAATTTTATTTCAACTATTTTTAATATACGTTTATTAGGATTAAAAATAGATAATATTTCTTTATTCAC

ATGATCAGTTAATATTACAGCAGTTTTATTATTATTATCATTGCCTGTTTTGGCAGGGGCAATTACTATATTGTTAA-CT

GATCGAAATTTAAATACAAGATTTTTTGATCCTTCAGGT-GGGGGGGATCCTATTTTATATCAACATTTATTT-------

-----------

>MG926884.1:183-649 Leiophron sp. YMZ145_Leiophron_COL cytochrome oxidase subunit I (COI) gene, partial cds; mitochondrial

GGAAATTGGTTAATTCCTTTAATATTAGGGGCTCCTGATATAGCTTTCCCACGAATAAATAATATAAGATTTTGACTTTT

ACCCCCTTCATTATTTTTATTATTATTAAGAAGAGTTATAGGAATAGGAGCTGGAACAGGATGAACAGTTTACCCTCCTT

TATCTTTAAATTTAAGTCATTCTGGTATATCTGTTGATTTAGCTATTTTTTCTTTACATTTAGCTGGCATATCTTCAATT

ATAGGGGCAATTAATTTTATTTCTACTATTATTAATATGCGGTTATTAGGGTTAAAAATAGATAATATTTCTTTATTTAT

TTGATCTGTTAATATCACTGCTGTTTTACTTTTACTATCTTTACCTGTGTTAGCAGGAGCTATTACTATATTATTAA-CT

GATCGAAATTTAAATACAAGTTTTTTTGATCCTTCTGGT-GGGGGGGATCCTATTTTATATCAACATTT-----------

-----------

>MG926901.1:183-650 Leiophron sp. YMZ368_Leiophron_VEN cytochrome oxidase subunit I (COI) gene, partial cds; mitochondrial

GGAAATTGATTAATTCCTTTAATAATAGGAGCTCCTGATATAGCTTTCCCTCGAATAAATAATATGAGATTTTGGTTACT

TCCTCCCTCATTATTTTTATTATTAATAAGAGGAGTTATAGGGGTAGGGGTTGGGACTGGATGAACAGTTTATCCACCTT

TATCTTTAGGTTTAAGTCATTCAGGAATTTCTGTTGATATAGCTATTTTTTCTTTACATTTAGCTGGGATATCTTCAATT

ATGGGAGCAATTAATTTTATTTCTACAATTTTTAATATACGTTTATTAGGGTTAAAAATAGATAATATTTCTTTATTTAT

TTGATCAGTTAATATTACTGCTATTTTACTTTTATTATCTTTACCTGTGTTAGCAGGGGCAATTACTATATTATTAA-CT

GATCGAAATTTAAATACAAGATTTTTTGATCCTTCAGGT-GGAGGAGATCCAATTTTATATCAACATTTA----------

-----------

>MH926962.1:188-658 Braconidae sp. INDOBIOSYS-CCDB25376-C02 cytochrome oxidase subunit 1 (COI) gene, partial cds; mitochondrial

GGTAATTGATTAATTCCTTTAATATTAGGTGCTCCTGATATAGCTTTTCCTCGTATAAATAATATAAGATTTTGGTTATT

ACCACCTTCTTTATTTTTATTATTATTGAGAAGAATAATGGGTAGAGGTGTTGGTACTGGTTGAACAGTTTATCCTCCTT

TATCATTAAATTTAAGTCATTCTGATATATCGGTTGATTTAGCTATTTTTTCTTTGCATATAGCTGGTATATCATCAATT

ATAGGAGCAATTAATTTTATTTCAACTATTATTAATATACGGTTAGTTGGATTGAAATTTGATAATATTTCTTTATTTGT

ATGATCTGTTAATATTACAGCAGTATTATTATTGTTATCATTACCTGTTTTGGCAGGGGCTATTACTATGTTATTAA-CT

GATCGAAATTTAAATACAAGATTTTTTGATCCTTCAGGT-GGTGGGGATCCAATTTTATATCAACATTTATTT-------

-----------

>MH927721.1:188-658 Braconidae sp. INDOBIOSYS-CCDB25376-E01 cytochrome oxidase subunit 1 (COI) gene, partial cds; mitochondrial

GGTAATTGATTAATTCCTTTAATATTAGGTGCTCCTGATATAGCTTTTCCTCGTATAAATAATATAAGATTTTGGTTATT

ACCACCTTCTTTATTTTTATTATTATTGAGAAGAATAATGGGTAGAGGTGTTGGTACTGGTTGAACAGTTTATCCTCCTT

TATCATTAAATTTAAGTCATTCTGATATATCGGTTGATTTAGCTATTTTTTCTTTGCATATAGCTGGTATATCATCAATT

ATAGGAGCAATTAATTTTATTTCAACTATTATTAATATACGGTTAGTTGGATTGAAATTTGATAATATTTCTTTATTTGT

ATGATCTGTTAATATTACAGCAGTATTATTATTGTTATCATTACCTGTTTTGGCAGGGGCTATTACTATGTTATTAA-CT

GATCGAAATTTAAATACAAGATTTTTTGATCCTTCAGGT-GGTGGGGATCCAATTTTATATCAACATTTATTT-------

-----------

>MG926915.1:183-650 Leiophron sp. YMZ386_Leiophron_CON cytochrome oxidase subunit I (COI) gene, partial cds; mitochondrial

GGCAATTGATTAATTCCTTTAATAATAGGGGCTCCTGATATAGCTTTCCCTCGCATAAATAATATAAGATTTTGGTTATT

ACCTCCTTCTTTATTTTTGTTATTATTAAGAAGACTAATAGGGGTTGGGGCAGGGACAGGTTGAACAGTTTACCCTCCTT

TGTCATTAAATGTTAGACATTCAGGTATATCAGTTGATTTGGCTATTTTTTCTTTACATTTGGCTGGTATATCTTCAATT

ATAGGGGCAATTAATTTTATTTCTACAATTATTAATATACGTTTAATAGGATTAAAAATAGATAATATTTCTTTATTTAC

TTGATCAGTTAATATTACAGCTTTATTATTGTTATTATYTTTACCAGTTTTAGCTGGGGCTATTACTATATTATTAA-CT

GATCGTAACTTGAATACTAGGTTTTTTGATCCTTCAGGG-GGTGGTGACCCAATTTTGTATCAACATTTA----------

-----------

>MW784323.1:188-658 Euphorus sp. BBP-290 cytochrome oxidase subunit 1 (COI) gene, partial cds; mitochondrial

GGAAATTGATTAGTGCCTTTAATAATAGGAGCCCCAGATATAGCTTTCCCTCGTATAAATAATATAAGATTTTGATTATT

ACCTCCTTCATTATTTTTGTTATTAATAAGAAGAATTATAGGTGTAGGAGCTGGAACTGGATGAACAGTGTATCCACCTT

TATCTTCTAGTTTAGGTCATACTGGATTTTCTGTAGATTTGGCTATTTTTTCTTTACATTTAGCTGGTATTTCGTCTATT

ATAGGGGCAATTAACTTTATTTCAACTATTTTTAATATACGGTTATTAGGGTTAAAAATAGATAATATTTCTTTATTTAT

TTGATCAGTCAATATTACTGCTATTTTATTATTATTATCTTTACCTGTTTTAGCAGGTGCTATTACAATATTATTAA-CT

GATCGTAATTTAAATACAAGATTTTTTGATCCTTCTGGA-GGGGGGGATCCTATTTTGTATCAACATTTATTT-------

-----------

>MW784324.1:178-648 Euphorus sp. BBP-289 cytochrome oxidase subunit 1 (COI) gene, partial cds; mitochondrial

GGAAATTGATTAGTGCCTTTAATAATAGGAGCCCCAGATATAGCTTTCCCTCGTATAAATAATATAAGATTTTGATTATT

ACCTCCTTCATTATTTTTGTTATTAATAAGAAGAATTATAGGTGTAGGAGCTGGAACTGGATGAACAGTGTATCCACCTT

TATCTTCTAGTTTAGGTCATACTGGATTTTCTGTAGATTTGGCTATTTTTTCTTTACATTTAGCTGGTATTTCGTCTATT

ATAGGGGCAATTAACTTTATTTCAACTATTTTTAATATACGGTTATTAGGGTTAAAAATAGATAATATTTCTTTATTTAT

TTGATCAGTCAATATTACTGCTATTTTATTATTATTATCTTTACCTGTTTTAGCAGGTGCTATTACAATATTATTAA-CT

GATCGTAATTTAAATACAAGATTTTTTGATCCTTCTGGA-GGGGGGGATCCTATTTTGTATCAACATTTATTT-------

-----------

>MG926862.1:183-650 Leiophron fascipennis isolate JS01000238_Leiophron_fascipennis_SWE cytochrome oxidase subunit I (COI) gene, partial cds; mitochondrial

GGAAATTGATTAGTTCCATTAATAATAGGGGCTCCGGATATAGCTTTTCCTCGTATAAATAATATAAGATTTTGACTTCT

TCCTCCTTCTTTATTTATATTATTATTAAGAATAATAATAGGGATAGGGGCAGGTACTGGGTGAACAGTTTATCCCCCAT

TATCTTTAAATTTAAGTCATTCTAGAATGTCTGTTGATTTTACTATTTTTTCATTACATTTGGCAGGGATATCTTCAATT

ATAGGGGCTATTAATTTTATATCAACTATTTTTAATATGCGTTTATTAGGTTTAAAAATAGATAATATTTCTTTATTTGT

TTGGTCAGTTAATATTACTGCTTTATTATTATTATTATCTTTACCAGTTTTAGCTGGAGCTATTACTATGTTACTAA-CT

GATCGTAATTTAAATACAAGATTTTTTGATCCTTCAGGT-GGTGGAGATCCAATTTTATATCAACATTTA----------

-----------

>MF933249.1:188-658 Euphorinae sp. BIOUG23390-E04 cytochrome oxidase subunit 1 (COI) gene, partial cds; mitochondrial

GGTAATTGATTAGTTCCTTTAATAATAGGTGCTCCTGATATAGCTTTCCCACGAATAAATAATATAAGATTTTGATTATT

ACCTCCTTCATTAATTTTGTTATTATTAAGTAGAGTAGTAAGTGTAGGGGCAGGTACTGGGTGAACAGTATACCCTCCAT

TGTCTTTGAATGTAAGTCATTCAGGAATATCTGTAGATTTTGCTATTTTTTCTTTACATTTAGCAGGAATTTCTTCTATT

ATAGGAGCTATTAATTTTATTTCTACAATTTTAAATATACGATTATTAGGATTAAAGATAGATAATATTTCTTTATTTGT

ATGATCAGTTAATATTACTGCATTATTATTATTGCTTTCTTTGCCAGTTTTAGCAGGAGCTATTACTATATTATTAA-CT

GATCGAAATTTAAATACTAGTTTTTTTGATCCTTCAGGT-GGGGGTGATCCAATTTTATATCAACATTTATTT-------

-----------

>Euphorinae_sp._MF938120.1:188-658 Euphorinae sp. BIOUG23390-C01 cytochrome oxidase subunit 1 (COI) gene, partial cds; mitochondrial

GGTAATTGATTAGTTCCTTTAATAATAGGTGCTCCTGATATAGCTTTCCCACGAATAAATAATATAAGATTTTGATTATT

ACCTCCTTCATTAATTTTGTTATTATTAAGTAGAGTAGTAAGTGTAGGGGCAGGTACTGGGTGAACAGTATACCCTCCAT

TGTCTTTGAATGTAAGTCATTCAGGAATATCTGTAGATTTTGCTATTTTTTCTTTACATTTAGCAGGAATTTCTTCTATT

ATAGGAGCTATTAATTTTATTTCTACAATTTTAAATATACGATTATTAGGATTAAAGATAGATAATATTTCTTTATTTGT

ATGATCAGTTAATATTACTGCATTATTATTATTGCTTTCTTTGCCAGTTTTAGCAGGAGCTATTACTATATTATTAA-CT

GATCGAAATTTAAATACTAGTTTTTTTGATCCTTCAGGT-GGGGGTGATCCAATTTTATATCAACATTTATTT-------

-----------

>MG926870.1:183-650 Leiophron similis isolate JS01000553_Euphorus_basalis_SWE cytochrome oxidase subunit I (COI) gene, partial cds; mitochondrial

GGTAATTGGTTAATTCCTTTAATAATAGGAGCTCCTGATATGGCTTTCCCTCGTATAAATAATATAAGATTTTGATTACT

ACCTCCTTCTTTAATAATATTATTATTTAGAAGATTAATAGGGACCGGGGCTGGTACAGGATGAACAGTTTATCCTCCAT

TATCATTAAATTTAAGTCATTCTAGGATATCTGTTGATTTAGCAATTTTTTCTTTGCATTTAGCTGGTATATCATCAATT

ATAGGAGCTATTAATTTTATTACTACTATTATTAATATACGTTTATGAGGGTTAAAATTAGATAATATTACTTTATTTTC

ATGATCTGTTAATATTACAGCTTTATTATTATTATTATCTTTACCAGTTTTAGCGGGAGCAATTACTATATTATTAA-CT

GATCGTAATTTAAATACAAGATTTTTTGATCCTTCTGGT-GGGGGGGATCCTGTTTTATATCAACATTTA----------

-----------

>KJ591459.1:188-658 Litostolus sp. JS10_00274 cytochrome oxidase subunit I (COI) gene, partial cds; mitochondrial

GGAAATTGATTAATTCCTTTAATATTAGGAATTCCTGATATAGCTTTCCCTCGAATAAATAATATAAGATTTTGGTTATT

ACCTCCTTCTTTATTATTATTAATTATAAGTAATTTAATAAATATGGGGGTAGGGACAGGTTGGACAGTTTATCCCCCCC

TATCATTAAATATAGGACATAGTGGTATTTCTGTAGATATGGCTATTTTTTCTTTACATTTAGCTGGAATTTCTTCTATT

ATGGGAGCAATTAATTTTATTTCAACTATTATAAATATGCGTTTAATAGGATTAAAATTAGACAATCTTACTTTATTTAG

GTGGTCAGTAAAAATTACAGCAATTTTGTTGTTATTGTCTTTACCTGTTTTAGCAGGGGCTATTACTATACTATTAA-CG

GATCGAAACTTAAATACTTCTTTTTTTGATCCGGCAGGA-GGGGGGGACCCTGTTTTATATCAGCATTTATTT-------

-----------

>Centistes_ater_FJ413824.1:187-657 Centistes ater voucher BIOUG<CAN>:06-PROBE-4301 cytochrome oxidase subunit 1 (COI) gene, partial cds; mitochondrial

GGAAATTGGTTGATTCCTTTGATATTGGGGGCACCTGATATGGCTTTCCCACGAATGAATAACATGAGGTTTTGGTTGTT

GCCTCCCTCTCTTTTTTTTTTATTAATGAGAAGATTTTTAAATTTAGGGGCGGGAACAGGGTGAACTGTTTATCCTCCCC

TTTCTTTGAATGTTAGTCATGGTGGTATATCTGTAGATATTGCTATTTTTTCACTTCATTTGGCTGGGATTTCTTCTATT

TTAGGGGCTGTTAATTTTATTTCTACAATTATGAATATGCGGTTGGTTGGATTAAAGTGGGATAATATTTCTTTATTAAG

ATGGTCTGTTAATATTACTGCTGTATTGTTATTATTATCTTTGCCGGTATTAGCTGGGGCTATTACTATGTTATTAA-CT

GACCGTAATTTGAATACTTCTTTTTTTGATCCTGCAGGG-GGGGGCGATCCTGTTTTATATCAACATTTATTT-------

-----------

>Centistes_ater_KJ591431.1:188-658 Centistes ater voucher JS10_00419 cytochrome oxidase subunit I (COI) gene, partial cds; mitochondrial

GGAAATTGGTTGATTCCTTTGATATTGGGGGCACCTGATATGGCTTTCCCACGAATGAATAACATGAGGTTTTGGTTGTT

GCCTCCCTCTCTTTTTTTTTTATTAATGAGAAGATTTTTAAATTTAGGGGCGGGAACAGGGTGAACTGTTTATCCTCCCC

TTTCTTTGAATGTTAGTCATGGTGGTATATCTGTAGATATTGCTATTTTTTCACTTCATTTGGCTGGGATTTCTTCTATT

TTAGGGGCTGTTAATTTTATTTCTACAATTATGAATATGCGGTTGGTTGGATTAAAGTGGGATAATATTTCTTTATTAAG

ATGGTCTGTTAATATTACTGCTGTATTGTTATTATTATCTTTGCCGGTATTAGCTGGGGCTATTACTATGTTATTAA-CT

GACCGTAATTTGAATACTTCTTTTTTTGATCCTGCAGGG-GGGGGCGATCCTGTTTTATATCAACATTTATTT-------

-----------

>Centistes_ater_KJ591435.1:188-658 Centistes ater voucher JS10_00503 cytochrome oxidase subunit I (COI) gene, partial cds; mitochondrial

GGAAATTGGTTGATTCCTTTGATATTGGGGGCACCTGATATGGCTTTCCCACGAATGAATAACATGAGGTTTTGGTTGTT

GCCCCCTTCTCTTTTTTTTTTATTAATGAGAAGATTTTTAAATTTAGGTGCGGGAACAGGGTGAACTGTTTATCCTCCTC

TTTCTTTGAATGTTAGTCATGGTGGTATATCTGTAGATATTGCTATTTTTTCACTTCATTTGGCTGGGATTTCTTCTATT

TTAGGGGCTGTTAATTTTATTTCTACAATTATGAATATGCGGTTGGTTGGATTAAAGTGGGATAATATTTCTTTATTAAG

ATGGTCTGTTAATATTACTGCTGTATTGTTATTATTATCTTTACCGGTATTAGCTGGGGCTATTACTATGTTATTAA-CT

GATCGTAATTTGAATACTTCTTTTTTTGATCCTGCAGGG-GGGGGCGATCCTGTTTTATATCAACATTTATTT-------

-----------

>Allurus_lituratus_KJ591422.1:188-658 Allurus lituratus voucher JS10_00506 cytochrome oxidase subunit I (COI) gene, partial cds; mitochondrial

GGTAATTGACTTATTCCTTTAATGTTAGGAGCTCCAGATATAGCATTTCCTCGGATAAATAATATAAGATTTTGATTATT

ACCTCCTTCTCTTTTTTTTTTATTAATAAGGAGGTTTTTAAATTTAGGGGCAGGAACTGGTTGAACTGTTTATCCCCCTC

TTTCTTTAAATGTAAGGCATGGGGGTATATCTGTAGATATTGCTATTTTTTCTTTACATTTAGCTGGAATTTCTTCTATT

TTAGGGGCTGTAAATTTTATTTCCACTATTATAAATATACGATTGGAGGGTTTAAAGTGGGATAATATTTCTTTATTAAG

ATGATCTGTTAATATTACGGCTGTTTTATTACTATTATCTTTACCTGTTTTAGCAGGTGCTATTACTATGCTATTGA-CT

GATCGAAATTTAAATACTTCTTTTTTTGATCCATCTGGG-GGGGGGGACCCTGTTTTATATCACCATTTATTT-------

-----------

>Allurus_lituratus_KU521565.1:188-658 Allurus lituratus voucher JS10_00408 cytochrome oxidase subunit I (COI) gene, partial cds; mitochondrial

GGTAATTGACTTATTCCTTTAATGTTAGGAGCTCCAGATATAGCATTTCCTCGGATAAATAATATAAGATTTTGATTATT

ACCTCCTTCTCTTTTTTTTTTATTAATAAGGAGGTTTTTAAATTTAGGGGCAGGAACTGGTTGAACTGTTTATCCCCCTC

TTTCTTTAAATGTAAGGCATGGGGGTATATCTGTAGATATTGCTATTTTTTCTTTACATTTAGCTGGAATTTCTTCTATT

TTAGGGGCTGTAAATTTTATTTCCACTATTATAAATATACGATTGGAGGGTTTAAAGTGGGATAATATTTCTTTATTAAG

ATGATCTGTTAATATTACGGCTGTTTTATTATTATTATCTTTACCTGTTTTAGCAGGTGCTATTACTATGCTATTGA-CT

GATCGAAATTTAAATACTTCTTTTTTTGATCCATCTGGG-GGGGGGGATCCTGTTTTATATCACCATTTATTT-------

-----------

>Allurus_lituratus_KU521564.1:188-658 Allurus lituratus voucher JS10_00406 cytochrome oxidase subunit I (COI) gene, partial cds; mitochondrial

GGTAATTGACTTATTCCTTTAATGTTAGGAGCTCCAGATATAGCATTTCCTCGGATAAATAATATAAGATTTTGATTATT

ACCTCCTTCTCTTTTTTTTTTATTAATAAGGAGGTTTTTAAATTTAGGGGCAGGAACTGGTTGAACTGTTTATCCCCCTC

TTTCTTTAAATGTAAGGCATGGGGGTATATCTGTAGATATTGCTATTTTTTCTTTACATTTAGCTGGAATTTCTTCTATT

TTAGGGGCTGTAAATTTTATTTCCACTATTATAAATATACGATTGGAGGGTTTAAAGTGGGATAATATTTCTTTATTAAG

ATGATCTGTTAATATTACGGCTGTTTTATTATTATTATCTTTACCTGTTTTAGCAGGTGCTATTACTATGCTATTGA-CT

GATCGAAATTTAAATACTTCTTTTTTTGATCCATCTGGG-GGGGGGGATCCGGTTTTATATCACCATTTATTT-------

-----------

>Euphorinae_sp._KR792096.1:164-609 Euphorinae sp. BOLD-2016 voucher BIOUG01330-B04 cytochrome oxidase subunit 1 (COI) gene, partial cds; mitochondrial

GGTAATTGACTTATTCCTTTAATGTTAGGAGCTCCAGATATAGCATTTCCTCGGATAAATAATATAAGATTTTGATTATT

ACCTCCTTCTCTTTTTTTTTTATTAATAAGGAGGTTTTTAAATTTAGGGGCAGGAACTGGTTGAACTGTTTATCCCCCTC

TTTCTTTAAATGTAAGGCATGGGGGTATATCTGTAGATATTGCTATTTTTTCTTTACATTTAGCTGGAATTTCTTCTATT

TTAGGGGCTGTAAATTTTATTTCCACTATTATAAATATACGATTGGAGGGTTTAAAGTGGGATAATATTTCTTTATTAAG

ATGATCTGTTAATATTACGGCTGTTTTATTATTATTATCTTTACCTGTTTTAGCAGGTGCTATTACTATGCTATTGA-CT

GATCGAAATTTAAATACTTCTTTTTTTGATCCATCTGGG-GGGGGGGA--------------------------------

-----------

>Euphorinae_sp._KR792505.1:188-633 Euphorinae sp. BOLD-2016 voucher BIOUG01327-D11 cytochrome oxidase subunit 1 (COI) gene, partial cds; mitochondrial

GGTAATTGACTTATTCCTTTAATGTTAGGAGCTCCAGATATAGCATTTCCTCGGATAAATAATATAAGATTTTGATTATT

ACCTCCTTCTCTTTTTTTTTTATTAATAAGGAGGTTTTTAAATTTAGGGGCAGGAACTGGTTGAACTGTTTATCCCCCTC

TTTCTTTAAATGTAAGGCATGGGGGTATATCTGTAGATATTGCTATTTTTTCTTTACATTTAGCTGGAATTTCTTCTATT

TTAGGGGCTGTAAATTTTATTTCCACTATTATAAATATACGATTGGAGGGTTTAAAGTGGGATAATATTTCTTTATTAAG

ATGATCTGTTAATATTACGGCTGTTTTATTATTATTATCTTTACCTGTTTTAGCAGGTGCTATTACTATGCTATTGA-CT

GATCGAAATTTAAATACTTCTTTTTTTGATCCATCTGGG-GGGGGGGA--------------------------------

-----------

>Allurus_lituratus_KJ591423.1:188-658 Allurus lituratus voucher JS10_00409 cytochrome oxidase subunit I (COI) gene, partial cds; mitochondrial

GGTAATTGACTTATTCCTTTAATGTTAGGAGCTCCAGATATAGCATTTCCTCGGATAAATAATATAAGATTTTGATTATT

ACCTCCTTCTATTTTTTTTTTATTAATAAGGAGGTTTTTAAATTTAGGGGTAGGAACTGGTTGAACTGTTTATCCCCCTC

TTTCTTTAAATGTAAGGCATGGGGGTATATCTGTAGATATTGCTATTTTTTCTTTACATTTAGCAGGAATTTCTTCTATT

TTAGGGGCTGTAAATTTTATTTCCACTATTATAAATATACGATTGGAGGGTTTAAAGTGGGATAATATTTCTTTATTAAG

ATGATCTGTTAATATTACGGCTGTTTTATTATTATTATCTTTACCTGTTTTAGCGGGTGCTATTACTATGCTATTGA-CT

GATCGAAATTTAAATACTTCTTTTTTTGATCCATCTGGG-GGGGGGGATCCGGTTTTATTTCAACATTTATTT-------

-----------

>Allurus_muricatus_KU521563.1:188-658 Allurus muricatus voucher JS10_00405 cytochrome oxidase subunit I (COI) gene, partial cds; mitochondrial

GGTAATTGACTTATTCCATTAATATTAGGGGCTCCTGATATGGCTTTCCCTCGTATAAATAATATAAGGTTTTGGTTATT

ACCTCCTTCACTTTTTTTTTTGTTAATAAGAAGATTTTTAAATTTAGGGGCGGGGACTGGTTGGACTGTTTATCCTCCTC

TTTCTTTAAATGTGAGTCATGGTGGTATATCTGTTGATATTGCTATTTTTTCCTTACATTTAGCAGGTATTTCTTCAATT

TTAGGTGCTGTTAATTTTATTTCTACTATTATAAATATACGATTAATGGGATTAAAATGGGATAATTTATCTTTATTAAG

GTGATCAGTTAATATTACAGCTGTTTTATTATTGTTATCACTTCCTGTTCTTGCTGGAGCTATTACCATGTTATTGA-CT

GATCGAAATTTAAATACTTCTTTTTTTGATCCTGCTGGT-GGGGGGGACCCTGTTTTATATCAACATTTATTT-------

-----------

>Hymenoptera_sp._JN288747.1:188-658 Hymenoptera sp. BOLD:AAU8319 voucher BIOUG<CAN>:ASGLE2-0275 cytochrome oxidase subunit 1 (COI) gene, partial cds; mitochondrial

GGTAATTGATTAATTCCTTTAATATTAGGAGCTCCTGATATAGCTTTCCCTCGTCTTAATAATATAAGATTTTGATTACT

ACCTCCTTCATTATTTTTTTTATTAATAAGTAGATTTGTTAATTTAGGGGCGGGTACGGGTTGAACTGTTTATCCCCCTC

TTTCTTTAAGGGTAAGACATGGTGGTATATCTGTGGATATTGCTATTTTTTCTTTACATTTGGCTGGAATTTCATCTATT

TTGGGTGCAGTAAATTTTATTACTACAATTATAAATATACGTTTATTTGGATTAAATTGAGATAATATTTCTTTATTTAC

TTGATCTGTAAATATTACTGCAATTTTATTATTATTATCTTTACCTGTTTTAGCTGGGGCTATTACTATATTATTAA-CT

GATCGAAATTTAAATACTTCTTTTTTTGATCCTGCTGGT-GGGGGGGATCCTGTTTTATATCAACATTTATTT-------

-----------

>Centistes_sp._KR796030.1:188-630 Centistes sp. BOLD-2016 voucher BIOUG04311-B08 cytochrome oxidase subunit 1 (COI) gene, partial cds; mitochondrial

GGTAATTGATTAATTCCTTTAATATTAGGAGCTCCTGATATAGCTTTCCCTCGTCTTAATAATATAAGATTTTGATTACT

ACCTCCTTCATTATTTTTTTTATTAATAAGTAGATTTGTTAATTTAGGGGCGGGTACGGGTTGAACTGTTTATCCCCCTC

TTTCTTTAAGGGTAAGACATGGTGGTATATCTGTGGATATTGCTATTTTTTCTTTACATTTGGCTGGAATTTCATCTATT

TTGGGTGCAGTAAATTTTATTACTACAATTATAAATATACGTTTATTTGGATTAAATTGAGATAATATTTCTTTATTTAC

TTGATCTGTAAATATTACTGCAATTTTATTATTATTATCTTTACCTGTTTTAGCTGGGGCTATTACTATATTATTAA-CT

GATCGAAATTTAAATACTTCTTTTTTTGATCCTGCTGGT-GGGGG-----------------------------------

-----------

>Centistes_sp._MF935815.1:187-605 Centistes sp. BIOUG20602-F12 cytochrome oxidase subunit 1 (COI) gene, partial cds; mitochondrial

GGTAATTGATTAATTCCTTTAATATTAGGAGCTCCTGATATAGCTTTCCCTCGTCTTAATAATATAAGATTTTGATTACT

ACCTCCTTCATTATTTTTTTTATTAATAAGTAGATTTGTTAATTTAGGGGCGGGTACGGGTTNAACTGTTTATCCCCCTC

TTTCTTTAAGGGTAAGACATGGTGGTATATCTGTGGATATTGCTATTTTTTCTTTACATTTGGCTGGAATTTCATCTATT

TTGGGTGCAGTAAATTTTATTACTACAATTATAAATATACGTTTATTTGGATTAAATTGAGATAATATTTCTTTATTTAC

TTGATCTGTAAATATTACTGCAATTTTATTATTATTATCTTTACCTGTTTTAGCTGGGGCTATTACTATATTATTAA-CT

GATCGAAATTTAAATACTTC------------------------------------------------------------

-----------

>Centistes_sp._JN307888.1:188-601 Centistes sp. PHMAL722-10 voucher BIOUG<CAN>:10PHMAL-0722 cytochrome oxidase subunit 1 (COI) gene, partial cds; mitochondrial

GGTAATTGATTAATTCCTTTAATATTAGGAGCTCCTGATATAGCTTTCCCTCGTCTTAATAATATAAGATTTTGATTACT

ACCTCCTTCATTATTTTTTTTATTAATAAGTAGATTTGTTAATTTAGGGGCGGGTACGGNNNTANCTGTTTATCCCCCTC

TTTCTTTAAGGGTAAGACATGGTGGTATATCTGTGGATATTGCTATTTTTTCTTTACATTTGGCTGGAATTTCATCTATT

TTGGGTGCAGTAAATTTTATTACTACAATTATAAATATACGTTTATTTGGATTAAATTGAGATAATATTTCTTTATTTAC

TTGATCTGTAAATATTACTGCAATTTTATTATTATTATCTTTACCTGTTTTAGCTGGGGCTATTACTATATTATTAA-CT

GATCGAAATTTAAAT-----------------------------------------------------------------

-----------

>KR878254.1:188-601 Euphorinae sp. BOLD-2016 voucher 10PHMAL-0706 cytochrome oxidase subunit 1 (COI) gene, partial cds; mitochondrial

GGTAATTGATTAATTCCTTTAATATTAGGAGCTCCTGATATAGCTTTCCCTCGTCTTAATAATATAAGATTTTGATTACT

ACCTCCTTCATTATTTTTTTTATTAATAAGTAGATTTGTTAATTTAGGGGCGGGTACGGGTTNAACTGTTTATCCCCCTC

TTTCTTTAAGGGTAAGACATGGTGGTATATCTGTGGATATTGCTATTTTTTCTTTACATTTGGCTGGAATTTCATCTATT

TTGGGTGCAGTAAATTTTATTACTACAATTATAAATATACGTTTATTTGGATTAAATTGAGATAATATTTCTTTATTTAC

TTGATCTGTAAATATTACTGCAATTTTATTATTATTATCTTTACCTGTTTTAGCTGGGGCTATTACTATATTATTAA-CT

GATCGAAATTTAAAT-----------------------------------------------------------------

-----------

>KR887515.1:188-601 Euphorinae sp. BOLD-2016 voucher 10PHMAL-0586 cytochrome oxidase subunit 1 (COI) gene, partial cds; mitochondrial

GGTAATTGATTAATTCCTTTAATATTAGGAGCTCCTGATATAGCTTTCCCTCGTCTTAATAATATAAGATTTTGATTACT

ACCTCCTTCATTATTTTTTTTATTAATAAGTAGATTTGTTAATTTAGGGGCGGGTACGGGNNNNNNTGTTTATNCCCCTC

TTTCTTTAAGGGTAAGACATGGTGGTATATCTGTGGATATTGCTATTTTTTCTTTACATTTGGCTGGAATTTCATCTATT

TTGGGTGCAGTAAATTTTATTACTACAATTATAAATATACGTTTATTTGGATTAAATTGAGATAATATTTCTTTATTTAC

TTGATCTGTAAATATTACTGCAATTTTATTATTATTATCTTTACCTGTTTTAGCTGGGGCTATTACTATATTATTAA-CT

GATCGAAATTTAAAT-----------------------------------------------------------------

-----------

>Centistes_sp._MF936942.1:187-600 Centistes sp. BIOUG20602-E06 cytochrome oxidase subunit 1 (COI) gene, partial cds; mitochondrial

GGTAATTGATTAATTCCTTTAATATTAGGAGCTCCTGATATAGCTTTCCCTCGTCTTAATAATATAAGATTTTGATTACT

ACCTCCTTCATTATTTTTTTTATTAATAAGTAGATTTGTTAATTTAGGGGCGGGTACGGGTTGAACTGTTTATCCCCCTC

TTTCTTTAAGGGTAAGACATGGTGGTATATCTGTGGATATTGCTATTTTTTCTTTACATTTGGCTGGAATTTCATCTATT

TTGGGTGCAGTAAATTTTATTACTACAATTATAAATATACGTTTATTTGGATTAAATTGAGATAATATTTCTTTATTTAC

TTGATCTGTAAATATTACTGCAATTTTATTATTATTATCTTTACCTGTTTTAGCTGGGGCTATTACTATATTATTAA-CT

GATCGAAATTTAAAT-----------------------------------------------------------------

-----------

>KR879068.1:188-603 Euphorinae sp. BOLD-2016 voucher 10PHMAL-1876 cytochrome oxidase subunit 1 (COI) gene, partial cds; mitochondrial

GGTAATTGATTAATTCCTTTAATATTAGGAGCTCCTGATATAGCTTTCCCTCGTCTTAATAATATAAGATTTTGATTACT

ACCTCCTTCATTATTTTTTTTATTAATAAGTAGATTTGTTAATTTAGGGGCGGGTACGGGTTTAACTGTTTATCCCCCTC

TTTCTTTAAGGGTAAGACATGGTGGTATATCTGTGGATATTGCTATTTTTTCTTTACATTTGGCTGGAATTTCATCTATT

TTGGGTGCAGTAAATTTTATTACTACAATTATAAATATACGTTTATTTGGATTAAATTGAGATAATATTTCTTTATTTAC

TTGATCTGTAAATATTACTGCAATTTTATTATTATTATCTTTACCTGTTTTAGCTGGGGCTATTACTATATTATTAA-CT

GATCGAAATTTAAATAC---------------------------------------------------------------

-----------

>KR877241.1:188-595 Euphorinae sp. BOLD-2016 voucher 10PHMAL-0687 cytochrome oxidase subunit 1 (COI) gene, partial cds; mitochondrial

GGTAATTGATTAATTCCTTTAATATTAGGAGCTCCTGATATAGCTTTCCCTCGTCTTAATAATATAAGATTTTGATTACT

ACCTCCTTCATTATTTTTTTTATTAATAAGTAGATTTGTTAATTTAGGGGCGGGTACGGGTTNAACTGTTTATCCCCCTC

TTTCTTTAAGGGTAAGACATGGTGGTATATCTGTGGATATTGCTATTTTTTCTTTACATTTGGCTGGAATTTCATCTATT

TTGGGTGCAGTAAATTTTATTACTACAATTATAAATATACGTTTATTTGGATTAAATTGAGATAATATTTCTTTATTTAC

TTGATCTGTAAATATTACTGCAATTTTATTATTATTATCTTTACCTGTTTTAGCTGGGGCTATTACTATATTATTAA-CT

GATCGAAAT-----------------------------------------------------------------------

-----------

>KR403046.1:189-592 Braconidae sp. BOLD:AAU8319 voucher BIOUG09936-B09 cytochrome oxidase subunit 1 (COI) gene, partial cds; mitochondrial

GGTAATTGATTAATTCCTTTAATATTAGGAGCTCCTGATATAGCTTTCCCTCGTCTTAATAATATAAGATTTTGATTACT

ACCTCCTTCATTATTTTTTTTATTAATAAGTAGATTTGTTAATTTAGGGGCGGGTACGGGTTGAACTGTTTATCCCCCTC

TTTCTTTAAGGGTAAGACATGGTGGTATATCTGTGGATATTGCTATTTTTTCTTTACATTTGGCTGGAATTTCATCTATT

TTGGGTGCAGTAAATTTTATTACTACAATTATAAATATACGTTTATTTGGATTAAATTGAGATAATATTTCTTTATTTAC

TTGATCTGTAAATATTACTGCAATTTTATTATTATTATCTTTACCTGTTTTAGCTGGGGCTATTACTATATTATTAA-CT

GATCG---------------------------------------------------------------------------

-----------

>KR405742.1:189-590 Braconidae sp. BOLD:AAU8319 voucher BIOUG10695-F09 cytochrome oxidase subunit 1 (COI) gene, partial cds; mitochondrial

GGTAATTGATTAATTCCTTTAATATTAGGAGCTCCTGATATAGCTTTCCCTCGTCTTAATAATATAAGATTTTGATTACT

ACCTCCTTCATTATTTTTTTTATTAATAAGTAGATTTGTTAATTTAGGGGCGGGTACGGGTTGAACTGTTTATCCCCCTC

TTTCTTTAAGGGTAAGACATGGTGGTATATCTGTGGATATTGCTATTTTTTCTTTACATTTGGCTGGAATTTCATCTATT

TTGGGTGCAGTAAATTTTATTACTACAATTATAAATATACGTTTATTTGGATTAAATTGAGATAATATTTCTTTATTTAC

TTGATCTGTAAATATTACTGCAATTTTATTATTATTATCTTTACCTGTTTTAGCTGGGGCTATTACTATATTATTAA-CT

GAT-----------------------------------------------------------------------------

-----------

>KR408398.1:188-589 Braconidae sp. BOLD:AAU8319 voucher BIOUG10375-F12 cytochrome oxidase subunit 1 (COI) gene, partial cds; mitochondrial

GGTAATTGATTAATTCCTTTAATATTAGGAGCTCCTGATATAGCTTTCCCTCGTCTTAATAATATAAGATTTTGATTACT

ACCTCCTTCATTATTTTTTTTATTAATAAGTAGATTTGTTAATTTAGGGGCGGGTACGGGTTGAACTGTTTATCCCCCTC

TTTCTTTAAGGGTAAGACATGGTGGTATATCTGTGGATATTGCTATTTTTTCTTTACATTTGGCTGGAATTTCATCTATT

TTGGGTGCAGTAAATTTTATTACTACAATTATAAATATACGTTTATTTGGATTAAATTGAGATAATATTTCTTTATTTAC

TTGATCTGTAAATATTACTGCAATTTTATTATTATTATCTTTACCTGTTTTAGCTGGGGCTATTACTATATTATTAA-CT

GAT-----------------------------------------------------------------------------

-----------

>Centistes_sp._KR892761.1:178-579 Centistes sp. BOLD-2016 voucher BIOUG12062-E01 cytochrome oxidase subunit 1 (COI) gene, partial cds; mitochondrial

GGTAATTGATTAATTCCTTTAATATTAGGAGCTCCTGATATAGCTTTCCCTCGTCTTAATAATATAAGATTTTGATTACT

ACCTCCTTCATTATTTTTTTTATTAATAAGTAGATTTGTTAATTTAGGGGCGGGTACGGGTTGAACTGTTTATCCCCCTC

TTTCTTTAAGGGTAAGACATGGTGGTATATCTGTGGATATTGCTATTTTTTCTTTACATTTGGCTGGAATTTCATCTATT

TTGGGTGCAGTAAATTTTATTACTACAATTATAAATATACGTTTATTTGGATTAAATTGAGATAATATTTCTTTATTTAC

TTGATCTGTAAATATTACTGCAATTTTATTATTATTATCTTTACCTGTTTTAGCTGGGGCTATTACTATATTATTAA-CT

GAT-----------------------------------------------------------------------------

-----------

>Centistes_sp._KR899535.1:181-582 Centistes sp. BOLD-2016 voucher BIOUG12661-G11 cytochrome oxidase subunit 1 (COI) gene, partial cds; mitochondrial

GGTAATTGATTAATTCCTTTAATATTAGGAGCTCCTGATATAGCTTTCCCTCGTCTTAATAATATAAGATTTTGATTACT

ACCTCCTTCATTATTTTTTTTATTAATAAGTAGATTTGTTAATTTAGGGGCGGGTACGGGTTGAACTGTTTATCCCCCTC

TTTCTTTAAGGGTAAGACATGGTGGTATATCTGTGGATATTGCTATTTTTTCTTTACATTTGGCTGGAATTTCATCTATT

TTGGGTGCAGTAAATTTTATTACTACAATTATAAATATACGTTTATTTGGATTAAATTGAGATAATATTTCTTTATTTAC

TTGATCTGTAAATATTACTGCAATTTTATTATTATTATCTTTACCTGTTTTAGCTGGGGCTATTACTATATTATTAA-CT

GAT-----------------------------------------------------------------------------

-----------

>Euphorinae_sp._KT604471.1:187-588 Euphorinae sp. BOLD:AAU8319 voucher BIOUG21892-A11 cytochrome oxidase subunit 1 (COI) gene, partial cds; mitochondrial

GGTAATTGATTAATTCCTTTAATATTAGGAGCTCCTGATATAGCTTTCCCTCGTCTTAATAATATAAGATTTTGATTACT

ACCTCCTTCATTATTTTTTTTATTAATAAGTAGATTTGTTAATTTAGGGGCGGGTACGGGTTGAACTGTTTATCCCCCTC

TTTCTTTAAGGGTAAGACATGGTGGTATATCTGTGGATATTGCTATTTTTTCTTTACATTTGGCTGGAATTTCATCTATT

TTGGGTGCAGTAAATTTTATTACTACAATTATAAATATACGTTTATTTGGATTAAATTGAGATAATATTTCTTTATTTAC

TTGATCTGTAAATATTACTGCAATTTTATTATTATTATCTTTACCTGTTTTAGCTGGGGCTATTACTATATTATTAA-CT

GAT-----------------------------------------------------------------------------

-----------

>Centistes_sp._MF936630.1:175-576 Centistes sp. BIOUG20602-G08 cytochrome oxidase subunit 1 (COI) gene, partial cds; mitochondrial

GGTAATTGATTAATTCCTTTAATATTAGGAGCTCCTGATATAGCTTTCCCTCGTCTTAATAATATAAGATTTTGATTACT

ACCTCCTTCATTATTTTTTTTATTAATAAGTAGATTTGTTAATTTAGGGGCGGGTACGGGTTGAACTGTTTATCCCCCTC

TTTCTTTAAGGGTAAGACATGGTGGTATATCTGTGGATATTGCTATTTTTTCTTTACATTTGGCTGGAATTTCATCTATT

TTGGGTGCAGTAAATTTTATTACTACAATTATAAATATACGTTTATTTGGATTAAATTGAGATAATATTTCTTTATTTAC

TTGATCTGTAAATATTACTGCAATTTTATTATTATTATCTTTACCTGTTTTAGCTGGGGCTATTACTATATTATTAA-CT

GAT-----------------------------------------------------------------------------

-----------

>KR408100.1:182-586 Braconidae sp. BOLD:AAU8319 voucher BIOUG10695-G11 cytochrome oxidase subunit 1 (COI) gene, partial cds; mitochondrial

GGTAATTGATTAATTCCTTTAATATTAGGAGCTCCTGATATAGCTTTCCCTCGTCTTAATAATATAAGATTTTGATTACT

ACCTCCTTCATTATTTTTTTTATTAATAAGTAGATTTGTTAATTTAGGGGCGGGTACGGGTTGAACTGTTTATCCCCCTC

TTTCTTTAAGGGTAAGACATGGTGGTATATCTGTGGATATTGCTATTTTTTCTTTACATTTGGCTGGAATTTCATCTATT

TTGGGTGCAGTAAATTTTATTACTACAATTATAAATATACGTTTATTTGGATTAAATTGAGATAATATTTCTTTATTTAC

TTGATCTGTAAATATTACTGCAATTTTATTATTATTATCTTTACCTGTTTTAGCTGGGGCTATTACTATATTATTAA-CT

GATCGA--------------------------------------------------------------------------

-----------

>Centistes_sp._KR884547.1:187-591 Centistes sp. BOLD-2016 voucher BIOUG13706-G07 cytochrome oxidase subunit 1 (COI) gene, partial cds; mitochondrial

GGTAATTGATTAATTCCTTTAATATTAGGAGCTCCTGATATAGCTTTCCCTCGTCTTAATAATATAAGATTTTGATTACT

ACCTCCTTCATTATTTTTTTTATTAATAAGTAGATTTGTTAATTTAGGGGCGGGTACGGGTTGAACTGTTTATCCCCCTC

TTTCTTTAAGGGTAAGACATGGTGGTATATCTGTGGATATTGCTATTTTTTCTTTACATTTGGCTGGAATTTCATCTATT

TTGGGTGCAGTAAATTTTATTACTACAATTATAAATATACGTTTATTTGGATTAAATTGAGATAATATTTCTTTATTTAC

TTGATCTGTAAATATTACTGCAATTTTATTATTATTATCTTTACCTGTTTTAGCTGGGGCTATTACTATATTATTAA-CT

GATCGA--------------------------------------------------------------------------

-----------

>KR413040.1:189-586 Braconidae sp. BOLD:AAU8319 voucher BIOUG10843-H09 cytochrome oxidase subunit 1 (COI) gene, partial cds; mitochondrial

GGTAATTGATTAATTCCTTTAATATTAGGAGCTCCTGATATAGCTTTCCCTCGTCTTAATAATATAAGATTTTGATTACT

ACCTCCTTCATTATTTTTTTTATTAATAAGTAGATTTGTTAATTTAGGGGCGGGTACGGGTTGAACTGTTTATCCCCCTC

TTTCTTTAAGGGTAAGACATGGTGGTATATCTGTGGATATTGCTATTTTTTCTTTACATTTGGCTGGAATTTCATCTATT

TTGGGTGCAGTAAATTTTATTACTACAATTATAAATATACGTTTATTTGGATTAAATTGAGATAATATTTCTTTATTTAC

TTGATCTGTAAATATTACTGCAATTTTATTATTATTATCTTTACCTGTTTTAGCTGGGGCTATTACTATATTATTAA-C-

--------------------------------------------------------------------------------

-----------

>KR414560.1:189-586 Braconidae sp. BOLD:AAU8319 voucher BIOUG09939-A09 cytochrome oxidase subunit 1 (COI) gene, partial cds; mitochondrial

GGTAATTGATTAATTCCTTTAATATTAGGAGCTCCTGATATAGCTTTCCCTCGTCTTAATAATATAAGATTTTGATTACT

ACCTCCTTCATTATTTTTTTTATTAATAAGTAGATTTGTTAATTTAGGGGCGGGTACGGGTTGAACTGTTTATCCCCCTC

TTTCTTTAAGGGTAAGACATGGTGGTATATCTGTGGATATTGCTATTTTTTCTTTACATTTGGCTGGAATTTCATCTATT

TTGGGTGCAGTAAATTTTATTACTACAATTATAAATATACGTTTATTTGGATTAAATTGAGATAATATTTCTTTATTTAC

TTGATCTGTAAATATTACTGCAATTTTATTATTATTATCTTTACCTGTTTTAGCTGGGGCTATTACTATATTATTAA-C-

--------------------------------------------------------------------------------

-----------

>Centistes_sp._MF934713.1:187-576 Centistes sp. BIOUG14374-C07 cytochrome oxidase subunit 1 (COI) gene, partial cds; mitochondrial

GGTAATTGATTAATTCCTTTAATATTAGGAGCTCCTGATATAGCTTTCCCTCGTCTTAATAATATAAGATTTTGATTACT

ACCTCCTTCATTATTTTTTTTATTAATAAGTAGATTTGTTAATTTAGGGGCGGGTACGGGTTGAACTGTTTATCCCCCTC

TTTCTTTAAGGGTAAGACATGGTGGTATATCTGTGGATATTGCTATTTTTTCTTTACATTTGGCTGGAATTTCATCTATT

TTGGGTGCAGTAAATTTTATTACTACAATTATAAATATACGTTTATTTGGATTAAATTGAGATAATATTTCTTTATTTAC

TTGATCTGTAAATATTACTGCAATTTTATTATTATTATCTTTACCTGTTTTAGCTGGGGCTATTACTATA----------

--------------------------------------------------------------------------------

-----------

>Centistes_sp._JN307907.1:188-628 Centistes sp. PHMTT844-10 voucher BIOUG<CAN>:10PHMAL-1843 cytochrome oxidase subunit 1 (COI) gene, partial cds; mitochondrial

GGTAATTGATTAATTCCTTTAATATTAGGAGCTCCTGATATAGCTTTCCCTCGTCTTAATAATATAAGATTTTGATTACT

ACCTCCTTCATTATTTTTTTTATTAATAAGTAGATTTGTTAATTTAGGGGCGGGTACGGGNNTANCTGTTTATCCCCCTC

TTTCTTTAAGGGTAAGACATGGTGGTATATCTGTGGATATTGCTATTTTTTCTTTACATTTGGCTGGAATTTCATCTATT

TTGGGTGCAGTAAATTTTATTACTACAATTATAAATATACGTTTATTTGGATTAAATTGAGATAATATTTCTTTATTTAC

TTGATCTGTAAATATTACTGCAATTTTATTATTATTATCTTTACCTGTTTTAGCTGGGGCTATTACTATATTATTAA-CT

GATCGAAATTTAAATACTTCTTTTTTTGATCCTGCTGGT-GGG-------------------------------------

-----------

>Centistes_sp._KJ591434.1:178-648 Centistes sp. 6 JMS-2015 voucher AB069 cytochrome oxidase subunit I (COI) gene, partial cds; mitochondrial

GGTAATTGATTAATTCCTTTAATATTAGGATCTCCTGATATAGCTTTTCCTCGTCTTAATAATATAAGGTTTTGATTACT

TTTTCCTTCTATATTTTTTTTATTAATAAGTAGATTTGTTAATTTAGGAGTAGGGACGGGTTGAACTGTTTATCCTCCTC

TTTCTTTAAATATTAGACATGGAGGTATATCTGTTGATATTGCAATTTTTTCTTTACATTTAGCAGGAATTTCTTCTATT

TTAGGTGCGGTAAATTTTATTACAACTATTATAAATATGCGATTAATGGGGTTAAATTTAGATAATGTTTCTTTATTAAT

TTGGTCAGTTAATATTACAGCTGTTTTGTTATTACTTTCTTTGCCTGTTTTAGCAGGTGCTATTACAATGTTATTAA-CT

GATCGAAATTTGAATACTTCTTTTTTTGATCCTGCTGGA-GGTGGTGATCCAATTTTATACCAACATTTATTT-------

-----------

>Parasitoid_from_Diabrotica_002_ 2 reads from 01A_A1_DIA_002 assembled using Geneious

--------------------------------------------------------------------ATTTTGGTTACT

TCCTCCTTCTTTATTTTTTTTATTAATAARAANATTTGTTAATATAGGGGCAGGTACTGGTTGAACAGTTTATCCCCCAC

TTTCTTTAAATATTAGTCATAGGGGAATATCTGTTGATATTGCTWTTTTTTCTTTACATATAGCAGGGATTTCTTCTATT

TTAGGGGCAGTTAATTTTATTACAACTATTATAAATATGCGTTTAATAGGATTAAATTGARATAATATTTCTTTATTAAT

TTGATCTGTTAATATTACAGCTGTTTTATTATTACTTTCTTTACCAGTTTTAGCTGGAGCTATTACTATATTATTAA-CG

GATCGAAATTTAAATACATCATTTTTTGATCCTGCTGGG-GGGGGGGATCCTGTTTTATATCAACA--------------

-----------

>Parasitoid_from_Diabrotica_027_ 2 reads from 03A_A3_Dia_027 assembled using Geneious

GGAAATTGATTAGTTCCTTTAATATTAGGGGCTCCTGATATAGCTTTCCCTCGTCTTAATAATATGAGATTTTGGTTACT

TCCTCCTTCTTTATTTTTTTTATTAATAAGAAGATTTGTTAATATAGGGGCAGGTACTGGTTGAACAGTTTATCCTCCAC

TTTCTTTAAATATTAGTCATAGTGGAATATCTGTTGATATTGCTATTTTTTCTTTACATATAGCAGGGATCTCTTCCATT

TTAGGGGCAGTTAATTTTATTACAACTATTATAAATATGCGTTTAATAGGATTAAATTGAGATAATATTTCTTTATTAAT

TTGATCTGTTAATATTACAGCTGTTTTATTATTACTTTCTTTACCAGTTTTAGCTGGGGCTATTACTATATTATTAA-CG

GATCGAAATTTAAATACATCATTTTTTGATCCTGCTGGG-GGGGGGGATCCTGTTTTATATCAACATTTATTTTGATTTT

TTGGGC-----

>Parasitoid_from_Diabrotica_080 2 reads from 2 documents assembled using Geneious

-----------------------------------------AGCTTTCCCTCGTCTTAATAATATGAGATTTTGATTACT

TCCTCCTTCTTTATTTTTTTTATTAATAAGAAGATTTGTTAATATAGGGGCAGGTACTGGTTGAACAGTTTATCCTCCAC

TTTCTTTAAATATTAGTCATAGTGGAATATCTGTTGATATTGCTATTTTTTCTTTACATATAGCAGGGATTTCTTCCATT

TTAGGGGCAGTTAATTTTATTACAACTATTATAAATATGCGTTTAATAGGATTAAATTGAGATAATATTTCTTTATTAAT

TTGATCTGTTAATATTACAGCTGTTTTATTATTACTTTCTTTACCAGTTTTAGCTGGGGCTATTACTATATTATTAA-CG

GATCGAAATTTAAATACATCATTTTTTGATCCTGCTGGG-GGGGGGGATCCTGTTTTATATCAACATTTATTTTGATTTT

TTGGGC-----

>Parasitoid_from_Diabrotica_088_ 2 reads from 03G_G3_DIA_088 assembled using Geneious

--------------------------------------------------------------------------------

---------TTTATTTTTTTTATTAATAAGAAGATTTGTTAATATAGGGGCAGGTACTGGTTGAACAGTTTATCCTCCAC

TTTCTTTAAATATTAGTCATAGTGGAATATCTGTTGATATTGCTATTTTTTCTTTACATATAGCAGGGATCTCTTCCATT

TTAGGGGCAGTTAATTTTATTACAACTATTATAAATATGCGTTTAATAGGATTAAATTGAGATAATATTTCTTTATTAAT

TTGATCTGTTAATATTACAGCTGTTTTATTATTACTTTCTTTACCAGTTTTAGCTGGGGCTATTACTATATTATTAA-CG

GATCGAAATTTAAATACATCATTTTTTGATCCTGCTGGG-GGGGGGGATCCTGTTTTATATCAACATTTATTTTGATTTT

TTGGGCACCCA

>Parasitoid_from_Diabrotica_091_ 2 reads from 04B_B4_DIA_091 assembled using Geneious

--------------------------------------------------------------------------------

---------TTTATTTTTTTTATTAATAAGAAGATTTGTTAATATAGGGGCAGGTACTGGTTGAACAGTTTATCCCCCAC

TTTCTTTAAATATTAGTCATAGTGGAATATCTGTTGATATTGCTATTTTTTCTTTACATATAGCAGGGATCTCTTCTATT

TTAGGGGCAGTTAATTTTATTACAACTATTATAAATATGCGTTTAATAGGATTAAATTGAGATAATATTTCTTTATTAAT

TTGATCTGTTAATATTACAGCTGTTTTATTATTACTTTCTTTACCAGTTTTAGCTGGAGCTATTACTATATTATTAA-CG

GATCGAAATTTAAATACATCGTTTTTTGATCCTGCTGGG-GGGGGGGATCCTGTTTTATACCAACATTTATTTTGATTTT

TTGGGCATCCA

>Parasitoid_from_Diabrotica_096_ 2 reads from 04G_G4_DIA_096 assembled using Geneious

-----------------------------------------AGCTTTTCCTCGTCTTAATAATATGAGATTTTGGTTACT

TCCTCCTTCTTTATTTTTTTTATTAATAAGAAGATTTGTTAATATAGGGGCAGGTACTGGTTGAACAGTTTATCCCCCAC

TTTCTTTAAATATTAGTCATAGGGGAATATCTGTTGATATTGCTATTTTTTCTTTACATATAGCAGGGATTTCTTCTATT

TTAGGGGCAGTTAATTTTATTACAACTATTATAAATATGCGTTTAATAGGATTAAATTGAGATAATATTTCTTTATTAAT

TTGATCTGTTAATATTACAGCTGTTTTATTATTACTTTCTTTACCAGTTTTAGCTGGAGCTATTACTATATTATTAA-CG

GATCGAAATTTAAATACATCATTTTTTGATCCTGCTGGG-GGGGGGGATCCTGTTTTATATCAACATTTATTTTGATTTT

TTGGGCACCCA

>Parasitoid_from_Diabrotica_074_ 2 reads from 02E_E2_DIA_074 assembled using Geneious

-------------------------------------------------------TTAATAATATGAGATTTTGGTTACT

TCCTCCTTCTTTATTTTTTTTATTAATAAGAAGATTTGTTAATATAGGGGCAGGTACTGGTTGAACAGTTTATCCTCCAC

TTTCTTTAAATATTAGTCATAGTGGAATATCTGTTGATATTGCTATTTTTTCTTTACATATAGCAGGGATCTCTTCCATT

TTAGGGGCAGTTAATTTTATTACAACTATTATAAATATGCGTTTAATAGGATTAAATTGAGATAATATTTCTTTATTAAT

TTGATCTGTTAATATTACAGCTGTTTTATTATTACTTTCTTTACCAGTTTTAGCTGGGGCTATTACTATATTATTAA-CG

GATCGAAATTTAAATACATCATTTTTTGATCCTGCTGGG-GGGGGGGATC------------------------------

-----------

>Parasitoid_from_Diabrotica_065 2 reads from 2 documents assembled using Geneious

------------------------------------------------------------------AGATTTTGGTTACT

TCCTCCTTCTTTATTTTTTTTATTAATAAGAAGATTTGTTAATATAGGGGCAGGTACTGGTTGAACAGTTTATCCTCCAC

TTTCTTTAAATATTAGTCATAGTGGAATATCTGTTGATATTGCTATTTTTTCTTTACATATAGCAGGGATCTCTTCCATT

TTAGGGGCAGTTAATTTTATTACAACTATTATAAATATGCGTTTAATAGGATTAAATTGAGATAATATTTCTTTATTAAT

TTGATCTGTTAATATTACAGCTGTTTTATTATTACTTTCTTTACCAGTTTTAGCTGGGGCTATTACTATATTATTAA-CG

GATCGAAATTTAAATACATCATTTTTTGATCCTGCTGGG-GGGGGG----------------------------------

-----------

>Parasitoid_from_Diabrotica_076_ 2 reads from 02F_F2_DIA_076 assembled using Geneious

--------------------------------------------------------------------ATTTTGGTTACT

TCCTCCTTYTTTATTTTTTTTWTTAANAAGAANATTTGTTAATATAGGGGCAGGTACTGGTTGAACAGTTTATCCCCCAC

TTTCTTTAAATATTAGTCATAGTGGAATATCTGTTGATATTGCTATTTTTTCTTTACATATAGCAGGGATCTCTTCTATT

TTAGGGGCAGTTAATTTTATTACAACTATTATAAATATGCGTTTAATAGGATTAAATTGARATAATATTTCTTTATTAAT

TTGATCTGTTAATATTACAGCTGTTTTATTATTACTTTCTTTACCAGTTTTAGCTGGAGCTATTACTATATTATTAA-CG

GATCGAAATTTAAATACATCGTTTTTTGATCCTGCTGGG-GGGGGG----------------------------------

-----------

>Parasitoid_from_Diabrotica_105_ 2 reads from 05D_D5_DIA_105 assembled using Geneious

--------------------------------------------------------------------------------

---------------------------AAGAAGATTTGTTAATATAGGGGCAGGTACTGGTTGAACAGTTTATCCTCCAC

TTTCTTTAAATATTAGTCATAGTGGAATATCTGTTGATATTGCTATTTTTTCTTTACATATAGCAGGGATCTCTTCCATT

TTAGGGGCAGTTAATTTTATTACAACTATTATAAATATGCGTTTAATAGGATTAAATTGAGATAATATTTCTTTATTAAT

TTGATCTGTTAATATTACAGCTGTTTTATTATTACTTTCTTTACCAGTTTTAGCTGGGGCTATTACTATATTATTAA-CG

GATCGAAATTTAAATACATCATTTTTTGATCCTGCTGGG-GGGGGGGATCCTGTTTTA----------------------

-----------

>Centistes_sp.__KJ591429.1:165-635 Centistes sp. JS10_00259 cytochrome oxidase subunit I (COI) gene, partial cds; mitochondrial

GGAAATTGATTAATTCCTTTAATGATAGGAGCTCCTGATATGGCTTTTCCTCGTTTAAATAATATAAGATTTTGATTGTT

ACCCCCTTCTTTATTTTTTTTGTTGATAAGAAGTTTTGTTAATGTTGGAGTAGGTACTGGATGAACAGTTTATCCCCCAT

TATCTTTAAATATGAGACATGGGGGTATATCAGTGGATATTGCAATTTTTTCTTTACATTTGGCTGGTGTTTCTTCAATT

TTAGGGGCGATAAATTTTATTACTACTATTTTAAATATGCGGTTATGTGGATTAGATTGGGATAATATTTCTTTGTTAGC

TTGATCTGTTAATATTACTGCTGTATTATTACTTCTTTCATTGCCTGTTTTAGCTGGGGCTATTACTATGCTATTAA-CT

GATCGTAATTTGAATACTTCTTTTTTTGATCCTGCTGGG-GGGGGGGATCCTGTTTTGTATCCCCATTTATTT-------

-----------

>Centistes_sp.__KJ591430.1:188-658 Centistes sp. JS10_00260 cytochrome oxidase subunit I (COI) gene, partial cds; mitochondrial

GGAAATTGATTAATTCCTTTAATGATAGGAGCTCCTGATATGGCTTTTCCTCGTTTAAATAATATAAGATTTTGATTATT

ACCTCCTTCTTTATTTTTTTTATTGATAAGAAGTTTTATTAATGTTGGAGCAGGTACTGGATGAACAGTTTACCCCCCAC

TATCTTTGAATATAAGACATGGGGGTATATCAGTGGATATTGCAATTTTTTCTTTACATTTGGCTGGTATTTCTTCAATT

TTAGGGGCGGTAAATTTTATTACCACTATTTTAAATATGCGGTTGTATGGTTTAAATTGGGATAATATTTCTTTATTAGC

TTGATCTGTTAATATTACTGCTGTATTATTACTTCTTTCATTACCTGTTTTAGCTGGGGCTATTACTATGTTATTAA-CT

GATCGGAATTTAAATACTTCTTTTTTTGATCCTGCTGGG-GGGGGGGATCCTGTTTTGTATCACCATTTATTT-------

-----------

>Centistes_cuspidatus_JN293214.1:188-658 Centistes cuspidatus voucher BIOUG<CAN>:10BBCHY-2247 cytochrome oxidase subunit 1 (COI) gene, partial cds; mitochondrial

GGAAACTGATTAATTCCACTAATATTAGGGGCACCGGATATAGCCTTTCCTCGTCTTAATAATATAAGATTTTGATTACT

GATTCCTTCAATTTTTTTTATATTGATAAGAAGATTTGTTAATTTAGGGACAGGGACTGGTTGGACTGTTTACCCACCTT

TATCATTAAATATTAGTCATGGGGGCATGTCGGTAGATATTGCAATTTTTTCTTTGCATTTAGCTGGTATTTCTTCTATT

TTAGGGGCTGTAAATTTTATTTCTACTATTATAAATATACGATTATTAGGTTTAGGTTGAGATAATATTACTCTTTTAAG

GTGATCTGTAAATATTACAGCTGTTTTGTTATTATTATCATTACCTGTATTAGCGGGGGCTATTACTATATTATTGA-CA

GATCGAAATTTAAATACTTCATTCTTTGACCCGGCTGGA-GGGGGGGATCCTGTACTTTATCAACATTTATTT-------

-----------

>Centistes_cuspidatus_MG439153.1:188-658 Centistes cuspidatus voucher BARS_2016_42_161 cytochrome oxidase subunit 1 (COI) gene, partial cds; mitochondrial

GGAAACTGATTAATTCCACTAATATTAGGGGCACCGGATATAGCCTTTCCTCGTCTTAATAATATAAGATTTTGATTACT

GATTCCTTCAATTTTTTTTATATTGATAAGAAGATTTGTTAATTTAGGGACAGGGACTGGTTGGACTGTTTACCCACCTT

TATCATTAAATATTAGTCATGGAGGCATGTCGGTAGATATTGCAATTTTTTCTTTGCATTTAGCTGGTATTTCTTCTATT

TTAGGGGCTGTAAATTTTATTTCTACTATTATAAATATACGATTATTAGGTTTAGGTTGAGATAATATTACTCTTTTAAG

GTGATCTGTAAATATTACAGCTGTTTTGTTATTATTATCATTACCTGTATTAGCGGGGGCTATTACTATATTATTGA-CA

GATCGAAATTTAAATACTTCATTCTTTGACCCGGCTGGA-GGGGGGGATCCTGTACTTTATCAACATTTATTT-------

-----------

>Centistes_cuspidatus_KJ591437.1:188-658 Centistes cuspidatus voucher JS10_00505 cytochrome oxidase subunit I (COI) gene, partial cds; mitochondrial

GGAAACTGATTAATTCCACTAATATTAGGGGCACCGGATATAGCCTTTCCTCGTCTTAATAATATAAGATTTTGATTACT

GATTCCTTCAATTTTTTTTATATTGATAAGAAGATTTGTTAATTTAGGGACAGGGACTGGTTGGACTGTTTACCCACCTC

TATCATTAAATATTAGTCATGGAGGTATGTCGGTAGATATTGCAATTTTTTCTTTGCATTTAGCTGGTATTTCTTCTATT

TTAGGGGCTGTAAATTTTATTTCTACTATTATAAATATACGATTATTAGGTTTAGGTTGAGATAATATTACTCTTTTAAG

GTGATCTGTAAATATTACAGCTGTTTTGTTATTATTATCATTACCTGTATTAGCGGGGGCTATTACTATATTATTGA-CA

GATCGAAATTTAAATACTTCATTCTTTGACCCGGCTGGA-GGGGGGGATCCTGTACTTTATCAACATTTATTT-------

-----------

>Euphorinae_sp._KR804428.1:188-658 Euphorinae sp. BOLD-2016 voucher BIOUG01037-B03 cytochrome oxidase subunit 1 (COI) gene, partial cds; mitochondrial

GGAAACTGATTAATTCCACTAATATTAGGGGCACCGGATATAGCCTTTCCTCGTCTTAATAATATAAGATTTTGATTACT

GATTCCTTCAATTTTTTTTATATTGATAAGAAGATTTGTTAATTTAGGGACAGGGACTGGTTGGACTGTTTACCCACCTC

TATCATTAAATATTAGTCATGGAGGCATGTCGGTAGATATTGCAATTTTTTCTTTGCATTTAGCTGGTATTTCTTCTATT

TTAGGGGCTGTAAATTTTATTTCTACTATTATAAATATACGATTATTAGGTTTAGGTTGAGATAATATTACTCTTTTAAG

GTGATCTGTAAATATTACAGCTGTTTTGTTATTATTATCATTACCTGTATTAGCGGGGGCTATTACTATATTATTGA-CA

GATCGAAATTTAAATACTTCATTCTTTGACCCGGCTGGA-GGGGGGGATCCTGTACTTTATCAACATTTATTT-------

-----------

>Euphorinae_sp._KR902315.1:188-658 Euphorinae sp. BOLD-2016 voucher BIOUG01496-C05 cytochrome oxidase subunit 1 (COI) gene, partial cds; mitochondrial

GGAAACTGATTAATTCCACTAATATTAGGGGCACCGGATATAGCCTTTCCTCGTCTTAATAATATAAGATTTTGATTACT

GATTCCTTCAATTTTTTTTATATTGATAAGAAGATTTGTTAATTTAGGGACAGGGACTGGTTGGACTGTTTACCCACCTC

TATCATTAAATATTAGTCATGGAGGCATGTCGGTAGATATTGCAATTTTTTCTTTGCATTTAGCTGGTATTTCTTCTATT

TTAGGGGCTGTAAATTTTATTTCTACTATTATAAATATACGATTATTAGGTTTAGGTTGAGATAATATTACTCTTTTAAG

GTGATCTGTAAATATTACAGCTGTTTTGTTATTATTATCATTACCTGTATTAGCGGGGGCTATTACTATATTATTGA-CA

GATCGAAATTTAAATACTTCATTCTTTGACCCGGCTGGA-GGGGGGGATCCTGTACTTTATCAACATTTATTT-------

-----------

>Centistes_cuspidatus_MG442524.1:188-658 Centistes cuspidatus voucher BARS_2016_43_142 cytochrome oxidase subunit 1 (COI) gene, partial cds; mitochondrial

GGAAACTGATTAATTCCACTAATATTAGGGGCACCGGATATAGCCTTTCCTCGTCTTAATAATATAAGATTTTGATTACT

GATTCCTTCAATTTTTTTTATACTGATAAGAAGATTTGTTAATTTAGGGACAGGGACTGGTTGGACTGTTTACCCACCTC

TATCATTAAATATTAGTCATGGAGGCATGTCGGTAGATATTGCAATTTTTTCTTTGCATTTAGCTGGTATTTCTTCTATT

TTAGGGGCTGTAAATTTTATTTCTACTATTATAAATATACGATTATTAGGTTTAGGTTGAGATAATATTACTCTTTTAAG

GTGATCTGTAAATATTACAGCTGTTTTGTTATTATTATCATTACCTGTATTAGCGGGGGCTATTACTATATTATTGA-CA

GATCGAAATTTAAATACTTCATTCTTTGACCCGGCTGGA-GGGGGGGATCCTGTACTTTATCAACATTTATTT-------

-----------

>Centistes_cuspidatus_KR879368.1:188-658 Centistes cuspidatus voucher BIOUG06655-E10 cytochrome oxidase subunit 1 (COI) gene, partial cds; mitochondrial

GGAAACTGATTAATTCCACTAATATTAGGGGCACCGGATATAGCTTTTCCTCGTCTTAATAATATAAGATTTTGATTACT

GATTCCTTCAATTTTTTTTATATTGATAAGAAGATTTGTTAATTTAGGGACAGGGACTGGTTGGACTGTTTACCCACCTT

TATCATTAAATATTAGTCATGGAGGCATGTCGGTAGATATTGCAATTTTTTCTTTGCATTTAGCTGGTATTTCTTCTATT

TTAGGGGCTGTAAATTTTATTTCTACTATTATAAATATACGATTATTAGGTTTAGGTTGAGATAATATTACTCTTTTAAG

GTGATCTGTAAATATTACAGCTGTTTTGTTATTATTATCATTACCTGTATTAGCGGGGGCTATTACTATATTATTGA-CA

GATCGAAATTTAAATCCTTCATTCTTTGACCCGGCTGGA-GGGGGGGATCCTGTACTTTATCAACATTTATTT-------

-----------

>Centistes_cuspidatus_KR895702.1:188-658 Centistes cuspidatus voucher BIOUG06655-C02 cytochrome oxidase subunit 1 (COI) gene, partial cds; mitochondrial

GGAAACTGATTAATTCCACTAATATTAGGGGCACCGGATATAGCCTTTCCTCGTCTTAATAATATAAGATTTTGATTACT

GATTCCTTCAATTTTTTTTATATTGATAAGAAGATTTGTTAATTTAGGGACAGGGACTGGTTGGACTGTTTACCCACCTT

TATCATTAAATATTAGTCATGGGGGCATGTCGGTAGATATTGCAATTTTTTCTTTGCATTTAGCTGGTATTTCTTCTATT

TTAGGGGCTGTAAATTTTATTTCTACTATTATAAATATACGATTATTAGGTTTAGGTTGAGATAATATTACTCTTTTAAG

GTGATCTGTAAATATTACAGCTGTTTTGTTATTATTATCATTACCTGTATTAGCGGGGGCTATTACTATATTATTGA-CA

GATCGAAATTTAAATCCTTCATTCTTTGACCCGGCTGGA-GGGGGGGATCCTGTACTTTATCAACATTTATTT-------

-----------

>Euphorinae_sp._KR794611.1:188-648 Euphorinae sp. BOLD-2016 voucher BIOUG06873-F01 cytochrome oxidase subunit 1 (COI) gene, partial cds; mitochondrial

GGAAATTGATTAATTCCTTTAATATTGGGTGCTCCGGATATAGCTTTCCCTCGTTTAAATAATATGAGATTTTGATTATT

GCCTCCTTCAATTTTTTTTTTATTAATAAGAAGATTTGTTAATCTGGGGGCGGGGACAGGGTGAACTGTTTATCCTCCTT

TGTCTTTAAATGTTAGTCATGGGGGTATGTCTGTAGATATTGCAATTTTTTCTTTACATTTAGCAGGTATTTCTTCTATT

TTGGGAGCTGTAAATTTTATTTCTACTATTATGAATATACGATTATTGGGGTTGAATTGAGATAATATTTCTTTAATAAG

ATGATCTGTAAATATTACAGCTGTTTTATTATTATTATCTCTTCCTGTTTTGGCGGGGGCAATTACTATATTGTTAA-CT

GATCGTAATTTAAATACTTCTTTTTTTGATCCAGCGGGG-GGGGGCGATCCTGTTCTTTATCA-----------------

-----------

>Syrrhizus_sp._KJ591526.1:188-658 Syrrhizus sp. JS10_00432 cytochrome oxidase subunit I (COI) gene, partial cds; mitochondrial

GGTAATTGATTAATTCCATTAATATTGGGGGCACCAGATATAGCTTTTCCACGTCTTAATAATATGAGGTTTTGGCTATT

GCCTCCATCAATTTTTTTATTGATTATGGGGAGATTTGTTAATTTGGGGGCAGGTACTGGTTGAACTGTTTATCCTCCAT

TGTCATTGAATGTTAGACATAGTGGTATGTCTGTTGATATTACTATTTTTTCTTTACACATAGCTGGTATTTCTTCAATT

TTAGGGGCTGTGAATTTTATTTCTACAATTATAAATATGCGATTATTGGGTTTGAAAGGAGATAATATTTCTTTATTAAG

ATGATCTGTTAATATTACTGCTGTATTATTATTATTGTCTTTGCCAGTATTGGCTGGGGCAATTACTATGTTATTAA-CT

GATCGTAATTTAAATACTTCGTTTTTTGATCCCGCAGGG-GGGGGGGATCCTGTACTTTATCAACATTTGTTT-------

-----------

>Centistes_sp._FN662425.1:188-651 Centistes sp. NHM670818 mitochondrial partial COI gene for cytochrome oxidase subunit I, specimen voucher NHM670818

GGAAATTGGTTGATTCCCCTGATGTTGGGGGCCCCTGATATGGCTTTCCCTCGTCTTAATAATATGAGGTTTTGATTATT

GCCTCCTTCTTTATTTTTTTTATTAATAAGAAGGTTTGTAAATTTGGGGGCAGGTACTGGTTGAACTGTGTATCCCCCCT

TATCCTTGAATGTGAGACATGGAGGAATATCTGTAGATATTGCTATTTTTTCTTTACATATGGCTGGTATTTCTTCTATT

TTGGGGGCAGTTAATTTTATTAGTACTATTATAAATATACGTTTAAGTGGGTTAAATTGAGATAATATTACTTTGTTAAT

TTGATCTGTTAATATTACAGTAGTTTTATTGTTATTGTCATTGCCTGTATTAGCAGGAGCTATTACTATGTTATTGA-CT

GATCGTAATTTGAATACTTCTTTTTTTGACCCAGCAGGG-GGAGGGGATCCAGTTTTATATCAACA--------------

-----------

>Plynops_hansoni_KJ591490.1:188-658 Plynops hansoni voucher AB067 cytochrome oxidase subunit I (COI) gene, partial cds; mitochondrial

GGAAATTGATTAATTCCTTTAATATTAGGAGCACCTGATATAGCTTTTCCTCGAATAAATAATATGAGATTTTGATTACT

ACCTCCTTCAATTTTTTTTATGTTAATAAGAAGGTTTGTAAATATTGGGGTTGGTACTGGTTGAACTGTTTATCCTCCTT

TATCATTAAATGTTAGACATGGTGGTATGTCTGTGGATATATCTATTTTTTCTTTACATTTAGCTGGAATATCGTCAATT

ATAGGGGCTGTTAATTTTATTTCTACTATTTTAAATATGCGATTAATAGGTTTAAAATTGGATAATATTTCTTTAATAAG

ATGGTCTGTAATAATTACAGCTGTATTATTATTATTATCTCTTCCAGTTTTGGCAGGTGCTATTACTATATTATTAA-CA

GATCGAAATTTAAATACTTCATTTTTTGATCCTGCAGGG-GGTGGGGATCCAATTTTATATCAACATTTATTT-------

-----------

>KJ591483.1:188-658 Perilitus sp. JS10_00216 cytochrome oxidase subunit I (COI) gene, partial cds; mitochondrial

GGGAATTGATTAATTCCTCTAATATTGGGGGCCCCTGATATAGCTTTCCCTCGAATAAATAATATGAGATTTTGATTACT

TCCTCCTTCATTATTTTTGTTGTTAATAAGAAGATTTTTGAATATTGGTACTGGGACGGGATGAACTGTTTATCCCCCCC

TATCTTTGAATGTTAGGCATAGTGGAATGTCAGTAGATATATCTATTTTTTCCTTACATTTAGCGGGGATATCCTCTATT

ATGGGGGCAATTAATTTTATTTCAACAATTTTAAATATACGATTAATGGGGGTAAGATTGAGTAATATTACTTTACTGGT

ATGATCAGTAAATATTACTGCTGTTTTATTATTATTATCGTTACCTGTTTTAGCTGGGGCTATTACAATATTATTAA-CA

GATCGAAATTTAAATACTACTTTTTTTGACCCTGCGGGA-GGGGGGGATCCTGTGTTATATCAGCATTTATTT-------

-----------

>KJ591448.1:188-658 Braconidae gen. n. sp. JS10_00266 cytochrome oxidase subunit I (COI) gene, partial cds; mitochondrial

GGAAATTGATTAGTGCCTTTAATATTAAGGTCTCCTGATATAGCTTTTCCTCGAATAAATAATATAAGATTTTGATTATT

ACCTCCTTCAGTAATTATATTATTATTAAGAAATTTTATTAGGATAGGAGCTGGAACTGGGTGAACTATTTATCCTCCAT

TATCAATAAATATTAATCATAGAGGTATATCTGTAGATATATTAATTTTTTCTTTACATTTAGCAGGAATTTCTTCAATT

ATAGGGGCTGTAAATTTTATTTCTACAATTATAAATATACGTTTAATGGGAGTTAAATATGATATAATTTCTTTAATAAT

TTGGTCAGTAAAAATTACTGCAATTTTGTTATTATTATCTTTACCTGTTTTAGCAGGAGCTATTACTATATTATTAA-CA

GATCGTAATTTAAATACATCATTTTATGATCCTTCTGGG-GGTGGGGATCCTGTATTATATCAACATTTATTT-------

-----------

>KJ591502.1:188-658 Spathicopis flavocephala voucher JS10_00176 cytochrome oxidase subunit I (COI) gene, partial cds; mitochondrial

GGAAATTGATTAATTCCATTAATATTAGGTGCTCCTGATATAGCTTTCCCTCGAATAAACAATATAAGATTTTGATTATT

GCCACCTTCATTATTTTTATTATTAATAAGAAATTTTTTAAATATTGGGGCTGGTACAGGATGAACTGTTTATCCTCCAT

TATCAATAAATGTGAGACATATAGGAGTTTCAGTGGATATGGTAATTTTTTCTTTACATTTAGCAGGGATTTCTTCTATT

ATAGGTGCAGTAAATTTTATTTCAACAATTATAAATATACATTTATTAGGATTAAATTATGATATAATTTCTTTATTTAC

TTGATCTGTAAAAATTACAGCATTATTGTTATTATTGTCTTTACCAGTATTAGCAGGGGCTATTACTATGTTATTAA-CA

GATCGAAATTTAAATACATCATTTTATGATCCAATGGGG-GGAGGTGACCCGGTTTTATATCAACATTTATTT-------

-----------

>KJ591486.1:188-658 Perilitus flavifacies voucher JS10_00510 cytochrome oxidase subunit I (COI) gene, partial cds; mitochondrial

GGAAATTGACTAGTTCCTTTAATATTGGGAGCTCCTGATATAGCTTTCCCTCGAATAAATAATATGAGATTTTGACTGTT

ACCTCCTTCTTTATTTATATTAATTTTAAGAAATTTTTTAAATGTAGGAGTAGGAACTGGATGAACAATTTATCCTCCTT

TATCTTTAAATGTTAGTCATAGGGGGATTTCTGTAGATATATCAATTTTTTCTTTACATTTAGCAGGGGTATCTTCTATT

ATAGGGGCTATTAATTTTATTTCAACTATTATTAATATACGTGTATATGGGGTAAATTATGATATAATTAGATTATTTAT

TTGATCAGTTAAAATTACAGTTATTTTATTATTATTGTCTTTGCCAGTTTTAGCGGGGGCTATTACTATATTATTGA-CG

GATCGTAATTTGAATACATCTTTTTATGATCCCGCAGGG-GGGGGAGATCCTATTTTATATCAACATTTATTT-------

-----------

>KF418765.1:213-694 Histeromerus sp. QL-2013 mitochondrion, partial genome

GGTAATTGATTAATTCCTTTAATATTAGGAGCTCCTGATATAGCTTTCCCTCGAATAAATAATATGAGATTTTGATTATT

ATTTCCTTCTTTATTTTTATTATTATTTAGAGGTATTGTTAATATTGGAGTAGGAACAGGGTGAACAGTTTATCCTCCAT

TATCTTCAACTGTTGGTCAGATAGGAATTTCAGTAGATTTAGCTATTTTTTCTTTACATTTAGCTGGTATTTCTTCTATT

ATAGGAGCTATTAATTTTATTACAACTATTTTTAATATACGGTTAATTAAATTAAGAATAGATCAAATTTCTTTATTAAT

TTGATCAGTTTTGATTACAGCTTTTTTATTATTATTGTCTTTACCTGTTTTAGCAGGTGCTATTACTATATTATTAA-CA

GATCGAAATTTAAATACTACTTTTTTTGATTTTTCTGGA-GGAGGAGATCCTGTATTATATCAGCATTTATTTTGATTTT

TTGG-------

>KR790154.1:188-658 Histeromerus sp. BOLD-2016 voucher BIOUG05982-B02 cytochrome oxidase subunit 1 (COI) gene, partial cds; mitochondrial

GGTAATTGATTAATTCCTTTAATATTAGGGGCTCCTGATATAGCTTTCCCTCGTATAAATAATATAAGATTTTGATTATT

AATTCCTTCTTTATTTTTACTTTTATTTAGAGGAATTGTTAATGTAGGGGTTGGTACAGGATGAACTGTTTATCCTCCAT

TATCTTCAACAATAGGTCAGATAGGAATTTCAGTTGATTTAGCTATTTTTTCTTTACATTTAGCAGGTATTTCTTCTATT

ATAGGGGCAATTAATTTTATTACAACTATTTTTAATATACGATTAATTAAATTAATAATAGATCAAATTTCTTTATTAAT

TTGATCAGTATTAATTACAGCTTTTTTATTATTATTATCTTTACCAGTTTTAGCAGGGGCTATTACTATATTATTAA-CT

GATCGTAATTTAAATACAACATTTTTTGATTTTTCTGGA-GGTGGAGATCCTGTTTTATATCAACATTTATTT-------

-----------

>KX058579.1:181-661 Histeromerus mystacinus cytochrome c oxidase subunit 1 (COI) gene, partial cds; mitochondrial

GGAAATTGATTAATTCCTTTAATATTAGGTGCTCCTGATATAGCTTTCCCTCGTATAAATAATATAAGATTTTGATTATT

AATTCCTTCTTTACTTTTACTTTTATTTAGAGGAATTGTTAATGTAGGGGTTGGTACAGGATGAACTGTTTATCCTCCCT

TATCTTCAACAATAGGTCAAATAGGAATTTCAGTTGATTTAGCTATTTTTTCTTTACATTTAGCGGGTATTTCTTCTATT

ATAGGAGCAATTAATTTTATTACAACTATTTTTAATATACGATTAATTAAATTAATAATAGATCAAATTTCTTTATTAAT

TTGATCAGTATTAATTACAGCTTTTTTATTATTATTATCTTTACCAGTTTTAGCAGGGGCTATTACTATATTATTAA-CT

GATCGTAATTTAAATACAACATTTTTTGATTTTTCTGGA-GGTGGAGATCCTGTTTTATATCAACATTTATTTTGATTTT

TTG--------

>KP943637.1:188-658 Alabagrus sp. H11326 cytochrome oxidase subunit I (COI) gene, partial cds; mitochondrial

GGAAATTGATTAATTCCTTTAATATTAAGAGCTCCTGATATAGCTTTTCCTCGAATAAATAATATAAGATTTTGATTATT

AATTCCTTCTTTATTATTATTAATTTCTAGATCTTTAATTAATTTAGGGGTAGGTACTGGTTGGACAGTATATCCTCCAT

TATCATTAAATAGAAGTCATAGGGGAATATCAGTAGATTTAGCTATTTTTTCTTTACATATTGCAGGAATTTCTTCTATT

TTAGGAGCAATTAATTTTATTACAACTATTTTAAATATATGAATAATTAATATTAAATTAGATAAAATATCATTATTAAT

TTGATCAATTTTTATTACAGCAATTTTATTATTATTATCTTTACCTGTTTTAGCAGGGGCTATTACTATATTATTAA-CT

GATCGAAATTTAAATACAAGATTTTTTGATCCTTCTGGA-GGAGGAGATCCTATTTTATATCAACATTTATTT-------

-----------

>MF361698.1:187-654 Alabagrus sp. H11326 cytochrome c oxidase subunit I (COI) gene, partial cds; mitochondrial

GGAAATTGATTAATTCCTTTAATATTAAGAGCTCCTGATATAGCTTTTCCTCGAATAAATAATATAAGATTTTGATTATT

AATTCCTTCTTTATTATTATTAATTTCTAGATCTTTAATTAATTTAGGGGTAGGTACTGGTTGGACAGTATATCCTCCAT

TATCATTAAATAGAAGTCATAGGGGAATATCAGTAGATTTAGCTATTTTTTCTTTACATATTGCAGGAATTTCTTCTATT

TTAGGAGCAATTAATTTTATTACAACTATTTTAAATATATGAATAATTAATATTAAATTAGATAAAATATCATTATTAAT

TTGATCAATTTTTATTACAGCAATTTTATTATTATTATCTTTACCTGTTTTAGCAGGGGCTATTACTATATTATTAA-CT

GATCGAAATTTAAATACAAGATTTTTTGATCCTTCTGGA-GGAGGAGATCCTATTTTATATCAACATTTA----------

-----------

>MF098381.1:187-654 Alabagrus texanus voucher H7539 cytochrome c oxidase subunit I (COI) gene, partial cds; mitochondrial

GGAAATTGATTAGTTCCTTTAATATTAAGAGCTCCTGATATAGCTTTCCCTCGAATAAATAATATAAGATTTTGATTATT

AATTCCATCTTTATTATTATTAATTTCTAGATCTTTAATTAATTTAGGGGTAGGTACTGGTTGAACAGTATATCCTCCAT

TATCTTTAAATAGAAGACATAGAGGAATATCAGTAGATTTAGCTATTTTTTCTTTACATATTGCAGGAATTTCTTCTATT

TTGGGAGCAATTAATTTTATTACAACTATTTTAAATATATGAATAATTAAAATTAAATTAGATAAAATATCATTATTAAT

TTGATCAATTTTTATTACAGCAATTTTATTATTATTATCTTTACCTGTATTAGCTGGAGCTATTACTATATTATTAA-CT

GATCGAAATTTAAATACAAGATTTTTTGATCCTTCAGGA-GGAGGTGATCCTATTTTATATCAACATTTA----------

-----------

>MF098380.1:91-572 Alabagrus marginatifrons voucher H111 cytochrome c oxidase subunit I (COI) gene, partial cds; mitochondrial

GGAAATTGATTAGTACCTTTAATATTAAGAGCACCGGATATAGCTTTCCCTCGAATAAATAATATAAGATTTTGATTATT

AATTCCTTCTTTATTATTATTAATTTCTAGATCTTTAATTAATTTAGGGGTAGGAACAGGTTGAACAGTTTATCCACCAT

TATCTTTAAATAGTAGTCATAGTGGTATATCGGTTGATTTAGCTATTTTTTCTTTACATATTGCTGGTATTTCTTCAATT

TTAGGGGCAATTAATTTTATTACTACTATTTTAAATATATGATTAATTAAAATTAAATTAGATAAAATACCATTATTAGT

TTGATCTATTTTTATTACAGCAATTTTATTATTATTATCTTTACCAGTATTAGCTGGAGCAATTACAATATTATTAA-CT

GATCGAAATTTAAATACAAGATTTTTTGATCCATCTGGG-GGAGGAGATCCAATTTTATATCAACATTTATTTTGATTTT

TTGG-------

>KF385869.1:171-652 Capitonius sp. QL-2013 mitochondrion, partial genome

GGGAATTGATTAATTCCATTAATATTAGGGGTTCCTGATATAGCATTTCCTCGAATAAATAATATGAGATTTTGGTTATT

ACCTCCTTCTATTAGTATATTGATTTTAAGAAATATAATTAATATTGGAGTTGGAACAGGTTGAACTGTTTATCCTCCTT

TGTCTTTAAATATAAGTCATAGTGGAATTTCTGTAGATTTTGCTATTTTTTCTTTACATTTAGCTGGTATTTCATCTATT

ATAGGAGCAATTAATTTTATTTCTACTATTATAAATTTGCGTTTGAATGGTTTAAAATTAGATAATGTAAATTTATTAAG

TTGATCAATTAATATTACAGCGGTTTTATTATTATTATCTTTACCAGTGTTAGCAGGTGCTATTACTATATTATTAA-CA

GATCGTAATTTAAATACATCTTTTTATGATCCATCAGGT-GGGGGTGATCCTATTTTATATCAACATTTATTTTGATTTT

TTGG-------

>Eadya_paropsidis_KX990088.1:178-624 Eadya paropsidis voucher BJS239 cytochrome oxidase subunit I (CO1) gene, partial cds; mitochondrial

GGTAATTGATTGGTTCCTTTGATATTAGGGGCTCCAGATATGGCTTTCCCTCGTATAAATAATATAAGGTTTTGGTTATT

ACCTCCTTCATTAATTTTATTATTAACAAGGAATTTTATTGGAATAGGGGTGGGTACAGGTTGAACTATTTATCCCCCCT

TATCTTTGAATTTAAGACATAGGGGGATATCTGTTGATATATCTATTTTTTCATTACATTTAGCGGGGATATCTTCAATT

ATGGGGGCAGTAAATTTTATTTCTACTATTATTAATATACGTTTATTAGGGTTAAATTATGATAATATTTCTTTATTAGT

TTGATCTGTTAATATTACAGCTATTTTATTACTATTATCATTACCAGTTTTAGCAGGGGCTATTACTATATTGTTAA-CT

GATCGTAATTTAAATACTTCATTTTTTGACCCTGCTGGG-GGGGGGGAT-------------------------------

-----------

>Eadya_paropsidis_KX990206.1:152-598 Eadya paropsidis voucher BJS397 cytochrome oxidase subunit I (CO1) gene, partial cds; mitochondrial

GGTAATTGATTGGTTCCTTTGATATTAGGGGCTCCAGATATGGCTTTCCCTCGTATAAATAATATAAGGTTTTGGTTATT

ACCTCCTTCATTAATTTTATTATTAACAAGGAATTTTATTGGAATAGGGGTGGGTACAGGTTGAACTATTTATCCCCCCT

TATCTTTGAATTTAAGACATAGGGGGATATCTGTTGATATATCTATTTTTTCATTACATTTAGCGGGGATATCTTCAATT

ATGGGGGCAGTAAATTTTATTTCTACTATTATTAATATACGTTTATTAGGGTTAAATTATGATAATATTTCTTTATTAGT

TTGATCTGTTAATATTACAGCTATTTTATTACTATTATCATTACCAGTTTTAGCAGGGGCTATTACTATATTGTTAA-CT

GATCGTAATTTAAATACTTCATTTTTTGACCCTGCTGGG-GGGGGGGAT-------------------------------

-----------

>Eadya_paropsidis_KX990091.1:178-624 Eadya paropsidis voucher BJS243 cytochrome oxidase subunit I (CO1) gene, partial cds; mitochondrial

GGTAATTGATTGGTTCCTTTGATATTAGGGGCTCCAGATATGGCTTTCCCTCGTATAAATAATATAAGGTTTTGGTTATT

ACCTCCTTCATTAATTTTATTATTAACAAGGAATTTTATTGGAATAGGGGTGGGTACAGGTTGAACTATTTATCCCCCCT

TATCTTTGAATTTAAGACATAGGGGGATATCTGTTGATATATCTATTTTTTCATTACATTTAGCGGGGATATCTTCAATT

ATGGGGGCAGTAAATTTTATTTCTACTATTATTAATATACGTTTATTAGGGTTAAATTATGATAATATTTCTTTATTAGT

TTGATCTGTTAATATTACAGCTATTTTATTACTATTATCATTACCAGTTTTAGCAGGGGCTATTACTATATTGTTAA-CT

GATCGTAATTTAAATACTTCATTTTTTGACCCTGCYGGG-GGGGGGGAT-------------------------------

-----------

>Eadya_paropsidis_KX990090.1:178-622 Eadya paropsidis voucher BJS241 cytochrome oxidase subunit I (CO1) gene, partial cds; mitochondrial

GGTAATTGATTGGTTCCTTTGATATTAGGGGCTCCAGATATGGCTTTCCCTCGTATAAATAATATAAGGTTTTGGTTATT

ACCTCCTTCATTAATTTTATTATTAACAAGGAATTTTATTGGAATAGGGGTGGGTACAGGTTGAACTATTTATCCCCCCT

TATCTTTGAATTTAAGACATAGGGGGATATCTGTTGATATATCTATTTTTTCATTACATTTAGCGGGGATATCTTCAATT

ATGGGGGCAGTAAATTTTATTTCTACTATTATTAATATACGTTTATTAGGGTTAAATTATGATAATATTTCTTTATTAGT

TTGATCTGTTAATATTACAGCTATTTTATTACTATTATCATTACCAGTTTTAGCAGGGGCTATTACTATATTGTTAA-CT

GATCGTAATTTAAATACTTCATTTTTTGACCCTGCTGGG-GGGGGGG---------------------------------

-----------

>Eadya_paropsidis_KX990207.1:137-580 Eadya paropsidis voucher BJS399 cytochrome oxidase subunit I (CO1) gene, partial cds; mitochondrial

GGTAATTGATTGGTTCCTTTGATATTAGGGGCTCCAGATATGGCTTTCCCTCGTATAAATAATATAAGGTTTTGGTTATT

ACCTCCTTCATTAATTTTATTATTAACAAGGAATTTTATTGGAATAGGGGTGGGTACAGGTTGAACTATTTATCCCCCCT

TATCTTTGAATTTAAGACATAGGGGGATATCTGTTGATATATCTATTTTTTCATTACATTTAGCGGGGATATCTTCAATT

ATGGGGGCAGTAAATTTTATTTCTACTATTATTAATATACGTTTATTAGGGTTAAATTATGATAATATTTCTTTATTAGT

TTGATCTGTTAATATTACAGCTATTTTATTACTATTATCATTACCAGTTTTAGCAGGGGCTATTACTATATTGTTAA-CT

GATCGTAATTTAAATACTTCATTTTTTGACCCTGCTGGG-GGGGGG----------------------------------

-----------

>MT246442.1:199-680 Eadya sp. RDR417 cytochrome c oxidase subunit I (COX1) gene, partial cds; mitochondrial

GGTAATTGGCTGGTTCCTTTAATATTAGGGGCCCCAGATATAGCTTTTCCTCGAATAAATAATATAAGGTTTTGATTATT

ACCCCCTTCATTAATTTTATTATTAATAAGGAATTTTATTGGAGCGGGTGTTGGTACGGGTTGAACTGTTTATCCACCAT

TATCATTGAATTTAAGTCATAGGGGGATATCTGTTGATATATCTATTTTTTCATTGCATTTAGCAGGTATGTCTTCAATT

ATAGGGGCAGTAAATTTTATTTCTACTATTATTAATATACGTCTATTAGGGTTAAGTTATGATAATATTTCTTTATTAGT

ATGATCTGTTAATATTACAGCTATTTTATTWTTACTCTCACTTCCAGTTTTAGCAGGGGCTATTACTATATTATTAA-CT

GATCGTAATTTAAATACTTCATTTTTTGATCCTGCTGGG-GGGGGGGATCCRATTTTATATCAACATTTGTTTTGATTTT

TTGG-------

>MT246443.1:199-680 Eadya sp. RDR418 cytochrome c oxidase subunit I (COX1) gene, partial cds; mitochondrial

GGTAATTGGCTGGTTCCTTTAATATTAGGGGCCCCAGATATAGCTTTTCCTCGAATAAATAATATAAGGTTTTGATTATT

ACCCCCTTCATTAATTTTATTATTAATAAGGAATTTTATTGGAGCGGGTGTTGGTACGGGTTGAACTGTTTATCCACCAT

TATCATTGAATTTAAGTCATAGGGGGATATCTGTTGATATATCTATTTTTTCATTGCATTTAGCAGGTATGTCTTCAATT

ATAGGGGCAGTAAATTTTATTTCTACTATTATTAATATACGTCTATTAGGGTTAAGTTATGATAATATTTCTTTATTAGT

ATGATCTGTTAATATTACAGCTATTTTATTWTTACTCTCACTTCCAGTTTTAGCAGGGGCTATTACTATATTATTAA-CT

GATCGTAATTTAAATACTTCATTTTTTGATCCTGCTGGG-GGGGGGGATCCGATTTTATATCAACATTTGTTTTGATTTT

TTGG-------

>MT246446.1:199-680 Eadya sp. RDR421 cytochrome c oxidase subunit I (COX1) gene, partial cds; mitochondrial

GGTAATTGGCTGGTTCCTTTAATATTAGGGGCCCCAGATATAGCTTTTCCTCGAATAAATAATATAAGGTTTTGATTATT

ACCCCCTTCATTAATTTTATTATTAATAAGGAATTTTATTGGAGCGGGTGTTGGTACGGGTTGAACTGTTTATCCACCAT

TATCATTGAATTTAAGTCATAGGGGGATATCTGTTGATATATCTATTTTTTCATTGCATTTAGCAGGTATGTCTTCAATT

ATAGGGGCAGTAAATTTTATTTCTACTATTATTAATATACGTCTATTAGGGTTAAGTTATGATAATATTTCTTTATTAGT

ATGATCTGTTAATATTACAGCTATTTTATTATTACTCTCACTTCCAGTTTTAGCAGGGGCTATTACTATATTATTAA-CT

GATCGTAATTTAAATACTTCATTTTTTGATCCTGCTGGG-GGGGGGGATCCRATTTTATATCAACATTTGTTTTGATTTT

TTGG-------

>EF032282.1:187-668 Pamphilius hortorum voucher Sus39 cytochrome oxidase subunit I (COI) gene, partial cds; mitochondrial

GGAAATTGATTAGTTCCATTAATATTAGGAGCTCCAGATATAGCTTTTCCTCGAATAAATAATATAAGATTTTGATTACT

TCCTCCTTCATTAATTTTTTTAATTTCTAGAAGAATTATAAATAAGGGTGCAGGTACAGGTTGAACAGTTTATCCACCTT

TATCTTCAAATTTATCTCATACTGGATCATCAGTTGATTTTGCAATTTTTTCTTTACATATAGCAGGAATTTCTTCAATT

ATAGGAGCAATTAATTTTATTTCAACAATTTTAAATATGCGAATTTCAGGTTTAATAATAGATCAAATATCATTATTTAT

TTGATCGGTATTTATTACAGCTTTTTTATTATTATTATCATTACCAGTTTTAGCCGGGGCAATTACTATACTATTAA-CA

GATCGAAATTTAAATACTTCATTTTTTGATCCAGCTGGA-GGAGGAGATCCTGTTTTATACCAACATTTATTTTGATTTT

TTGG-------

>KF936568.1:188-669 Pamphilidae sp. tL1 cytochrome oxidase subunit I (COI) gene, partial cds; mitochondrial

GGAAATTGACTTATTCCTTTAATATTAGGAGCTCCAGATATAGCTTTTCCTCGTATAAATAATATAAGATTTTGATTACT

TCCTCCTTCTTTAATTTTTTTAATTTCTAGAAGAATTATAAATAAAGGGGCTGGAACTGGATGAACAGTTTATCCCCCAT

TATCTTCTAATTTAACTCATACTGGATCATCTGTTGATTTTGCAATTTTTTCTTTACATATAGCTGGTATTTCTTCAATT

ATAGGGGCAATTAATTTTATTTCAACAATTTTAAATATACGAATTTCTGGATTAACAATAGATCAAATATCTTTATTTAT

TTGATCAGTATTTATTACAGCTTTTTTATTATTATTATCATTACCAGTTTTAGCTGGTGCTATTACTATATTATTAA-CA

GATCGTAATTTAAATACTTCATTTTTTGACCCCGCAGGG-GGAGGAGATCCTGTATTATACCAGCATTTATTTTGATTTT

TTGG-------

>MZ152216.1:2352-2833 Cephalcia infumata mitochondrion, complete genome

GGAAATTGATTAGTTCCTTTAATATTAGGGGCTCCTGATATAGCATTTCCTCGAATAAATAATATAAGATTTTGATTACT

GCCTCCTTCTTTAATTATATTATTAATTAGAAGAATTATAAATAAAGGCGCAGGAACTGGATGAACAGTCTATCCTCCTC

TTTCTTCTAATTTAACTCATACTGGATCATCAGTAGATTTTGCTATTTTTTCTTTACATATAGCTGGAATTTCATCAATT

ATAGGGGCGATTAATTTTATTTCTACAGTAATTAATATACGTACATCTGGGATATTATTTGACCAAATATCTTTATTTAT

TTGATCAGTAGCAATTACTGCTTTATTATTACTTTTATCATTACCTGTTTTAGCGGGGGCTATTACTATATTATTAA-CT

GATCGAAATTTAAATACATCTTTTTTTGATCCTGCAGGT-GGCGGGGATCCAGTTTTATATCAACATTTATTTTGATTTT

TTGG-------

**Supplemental Material 2.** Phylogenetic trees using different methods and matrices as well as example Sanger data.

**
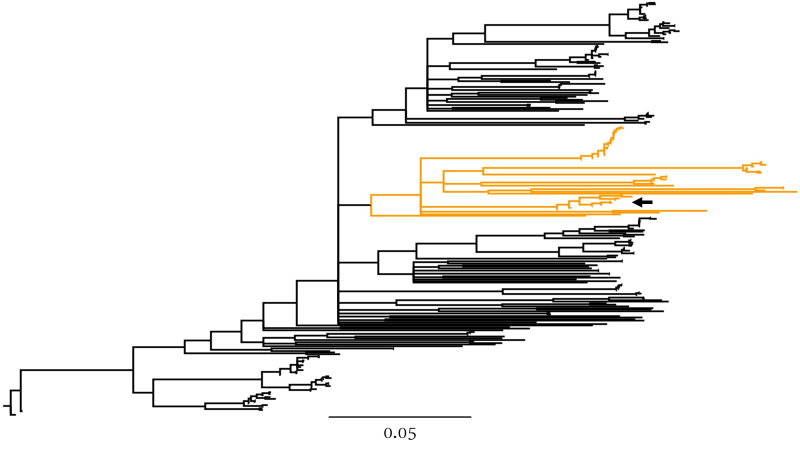
**

**Supplemental Figure S1.** Neighbor joining tree resolved from untrimmed CO1 sequences generated from this study (clade denoted with an arrow) aligned with the 250 best hits from a BLASTn search using PfD 027 as a query. This tree was used as first pass in determining which samples (denoted in orange) were employed for further analyses.


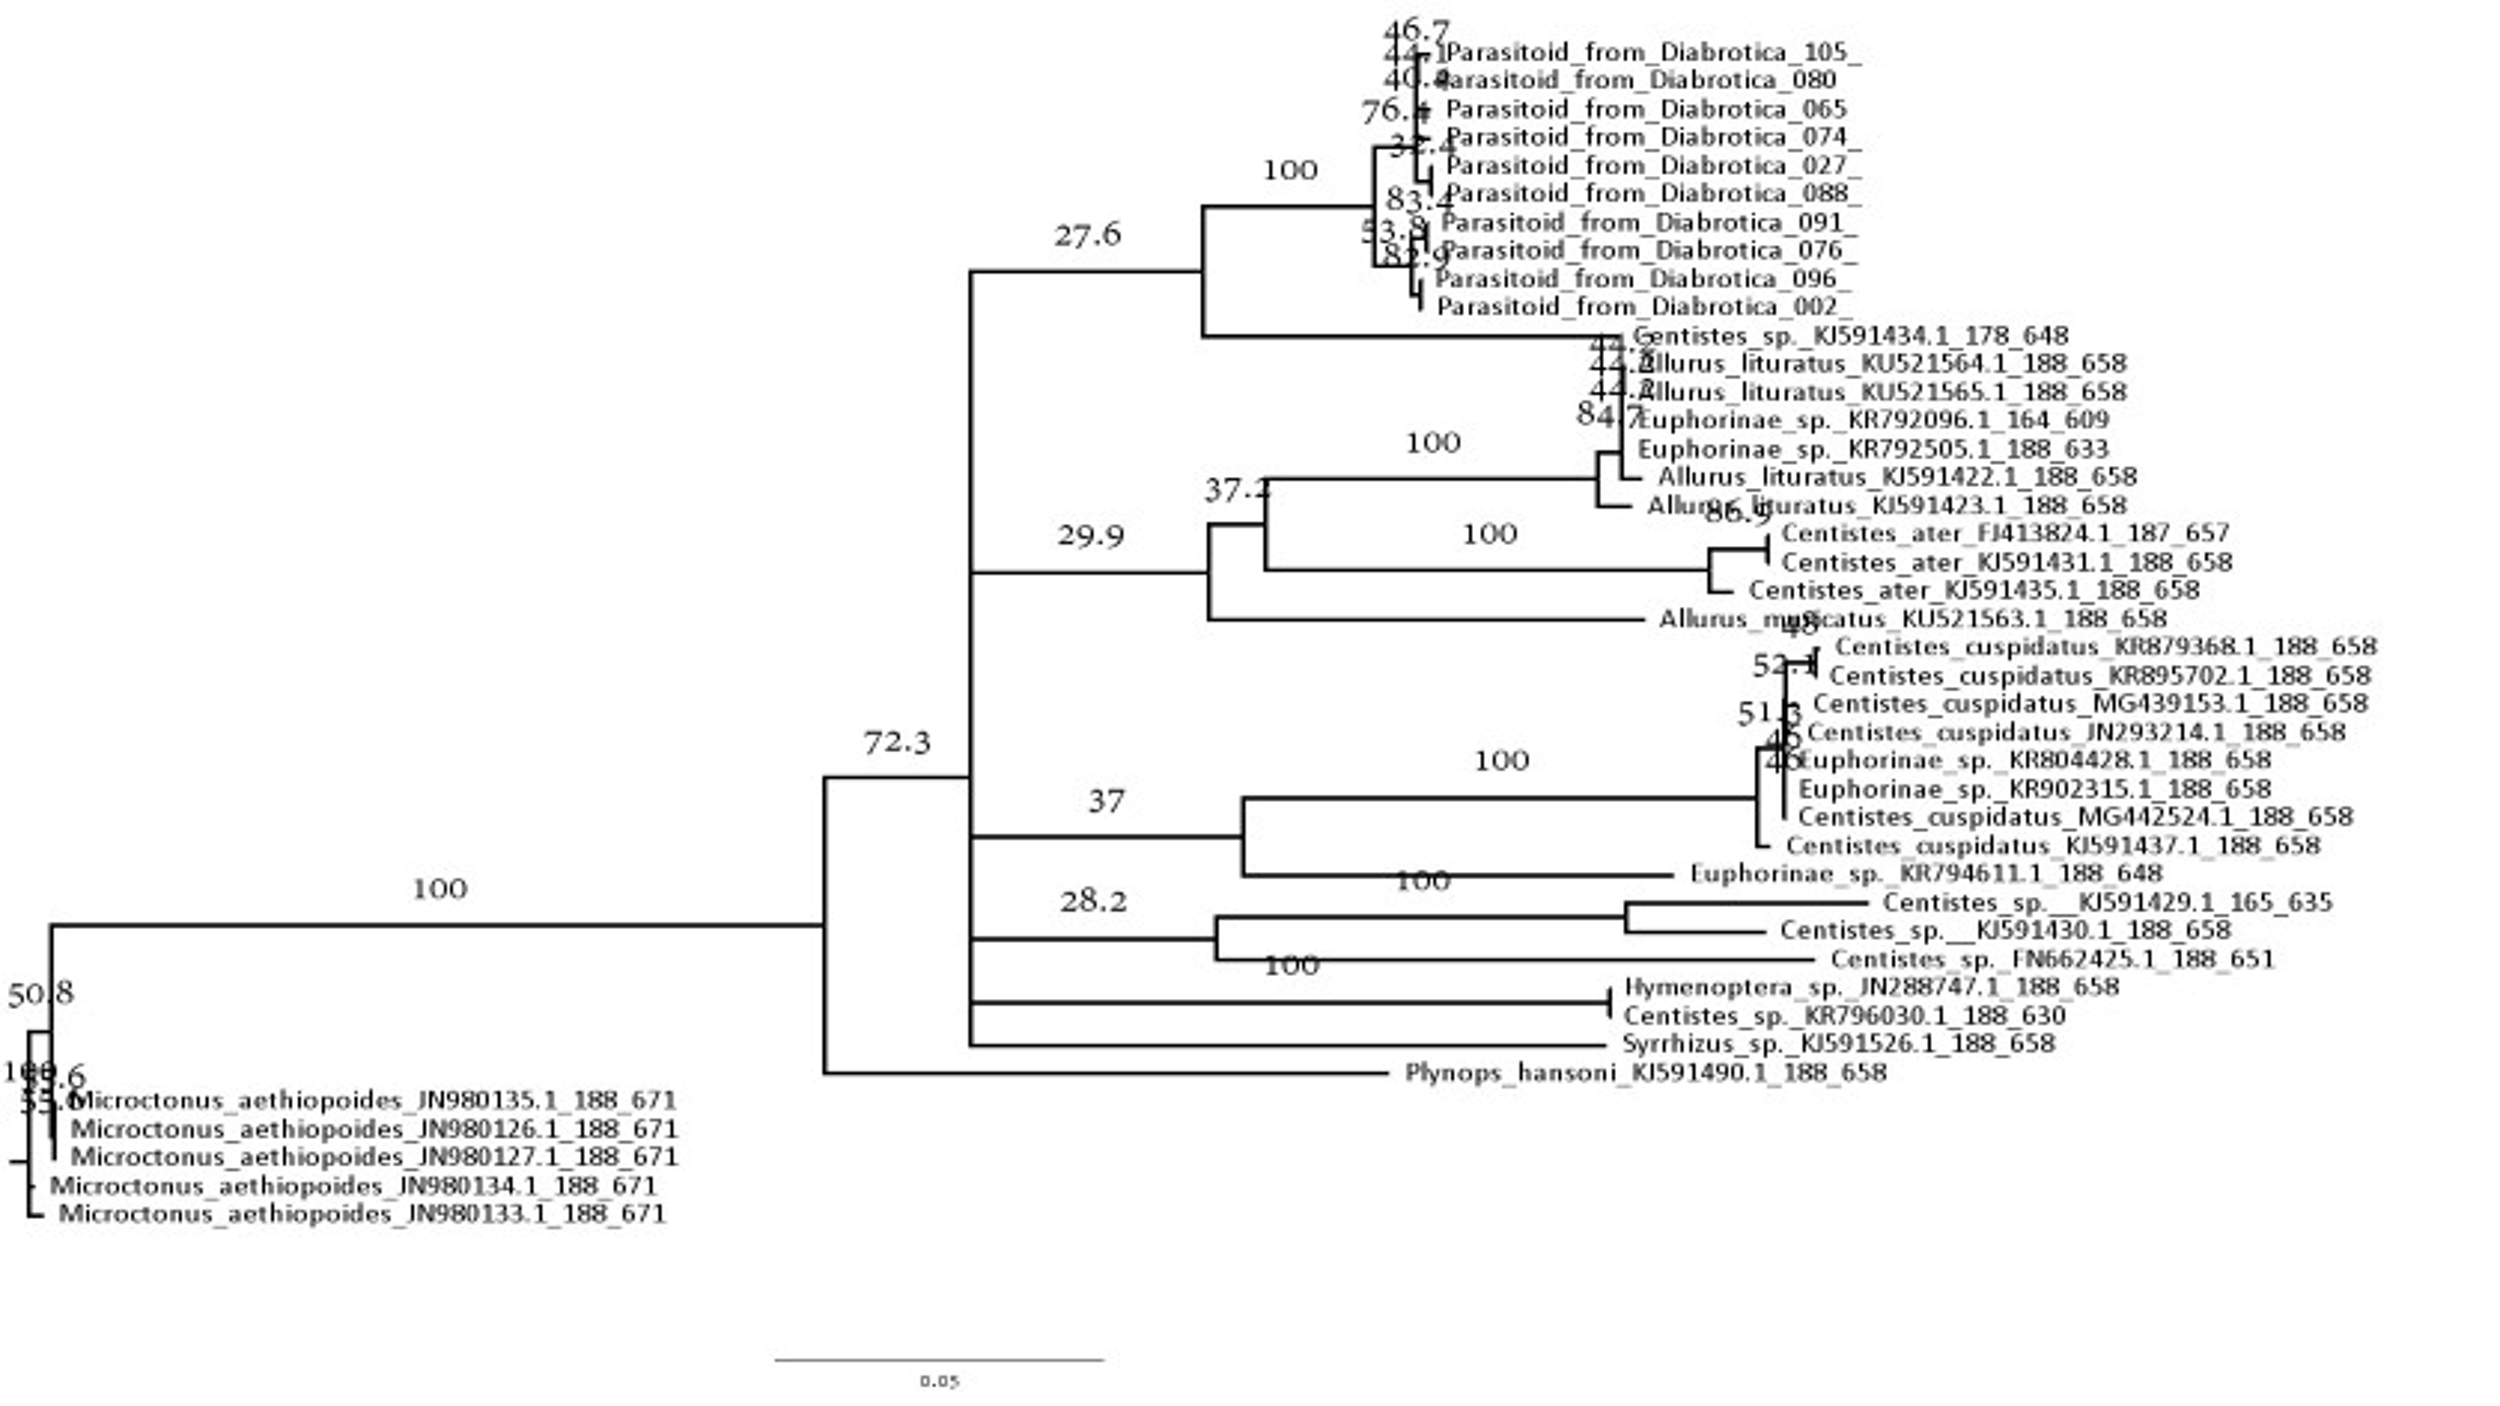


**Supplemental Figure S2.** Neighbor joining tree using Tamura-Nei distance model with 1,000 jack knife replicates to assess branch support, samples in this tree are taken from the orange clade in Supplemental **Fig S1**. GenBank accessions are denoted after the species names for sequences not generated in this study.


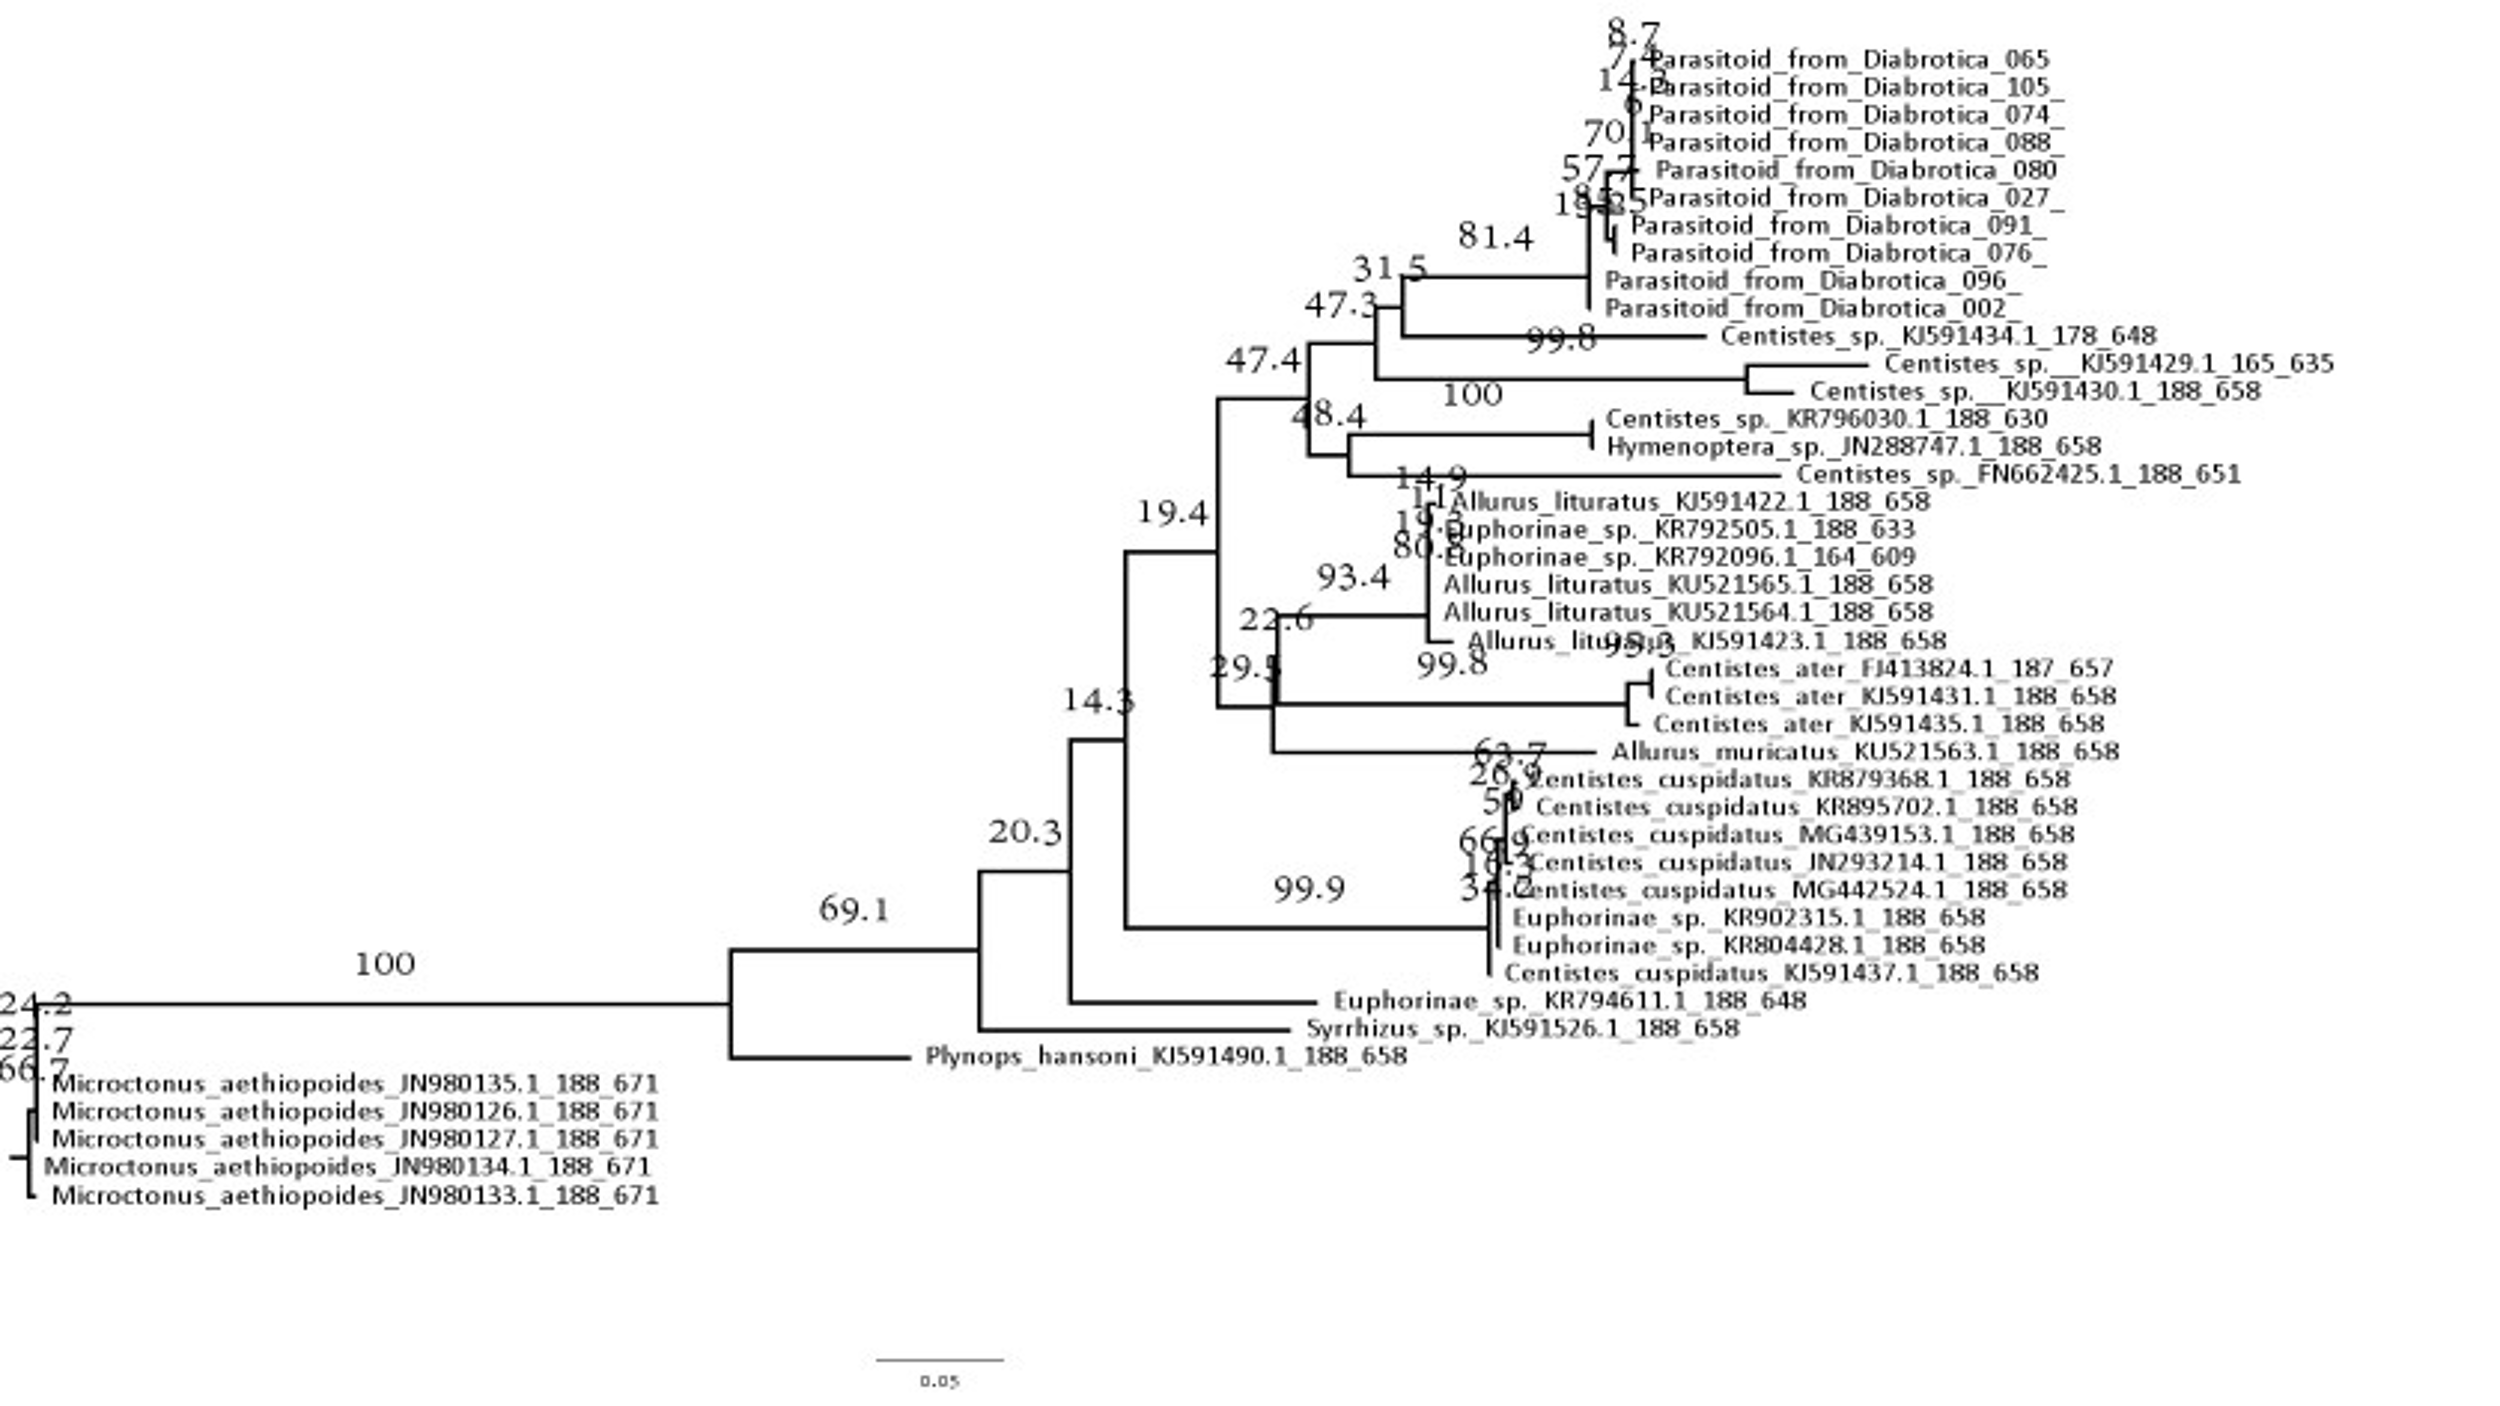


**Supplemental Figure S3.** Maximum Likelihood tree using a GTR nucleotide substitution model with 1000 bootstrap pseudoreplicates to assess branch support, samples in this tree are taken from the orange clade in Supplemental **Fig S1**. GenBank accessions are denoted after the species names for sequences not generated in this study.


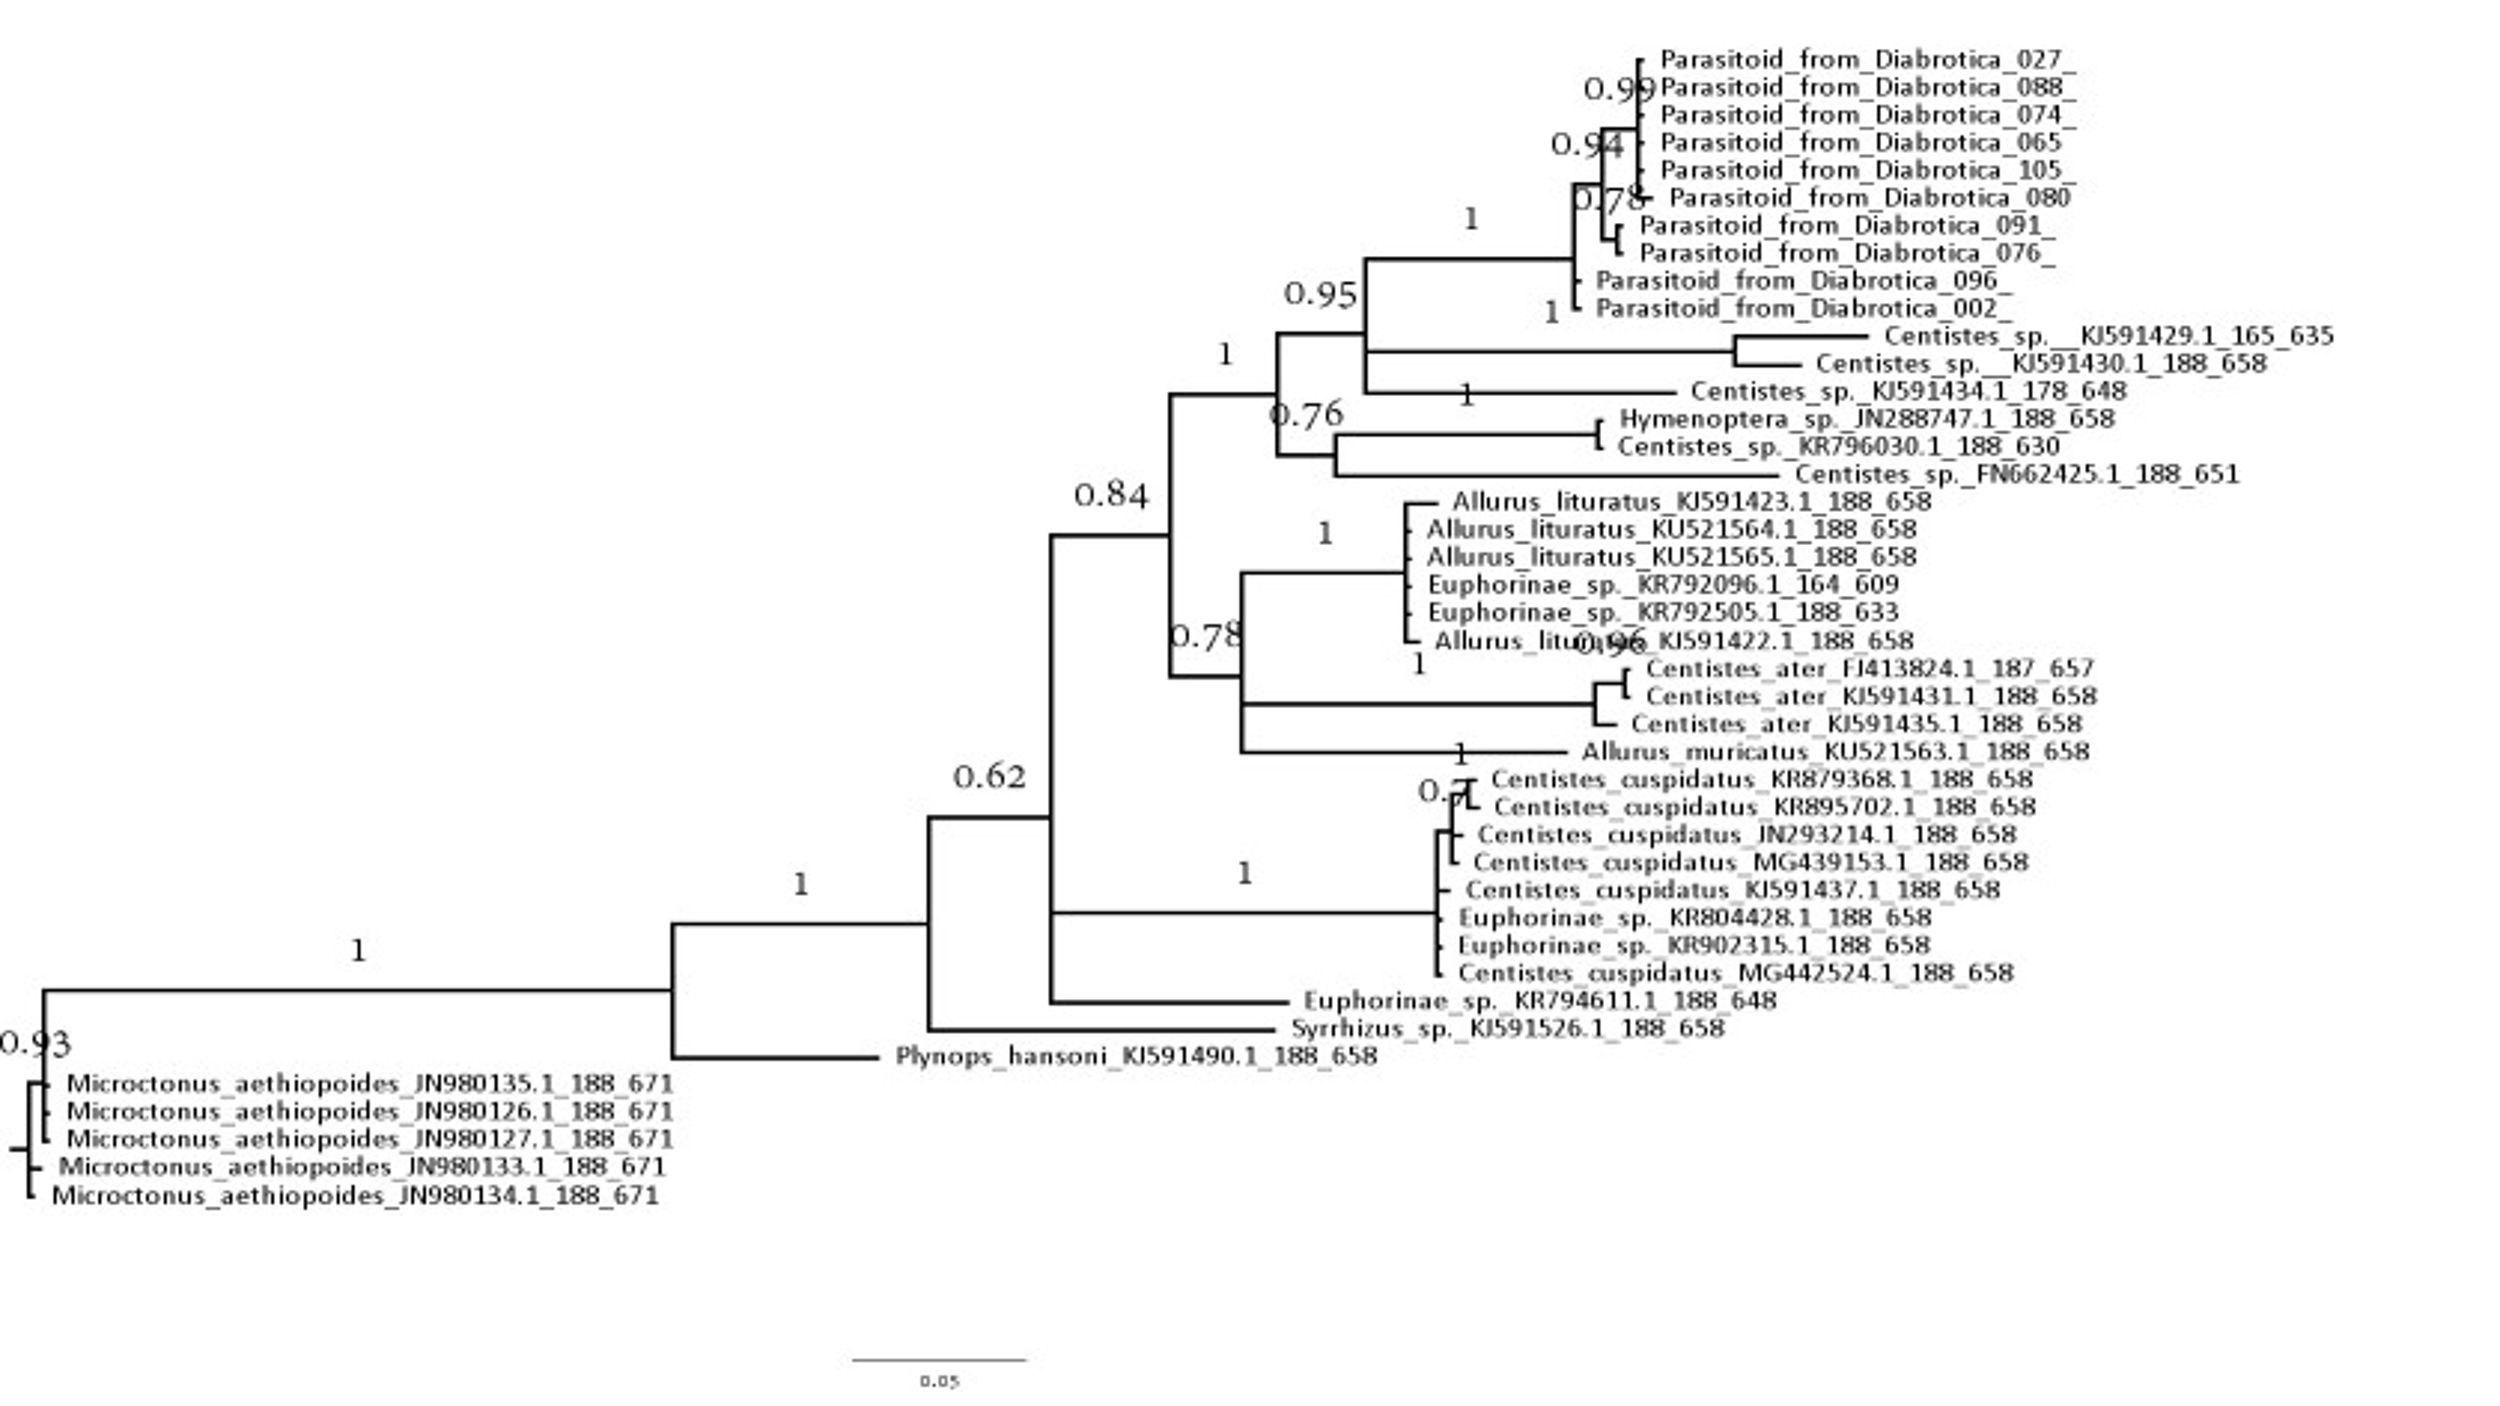


**Supplemental Figure S4.** Bayesian Inference using a GTR+I+G substitution model with posterior probability used to assess branch support. Samples in this tree are taken from the orange clade in Supplemental **Fig S1**. GenBank accessions are denoted after the species names for sequences not generated in this study.


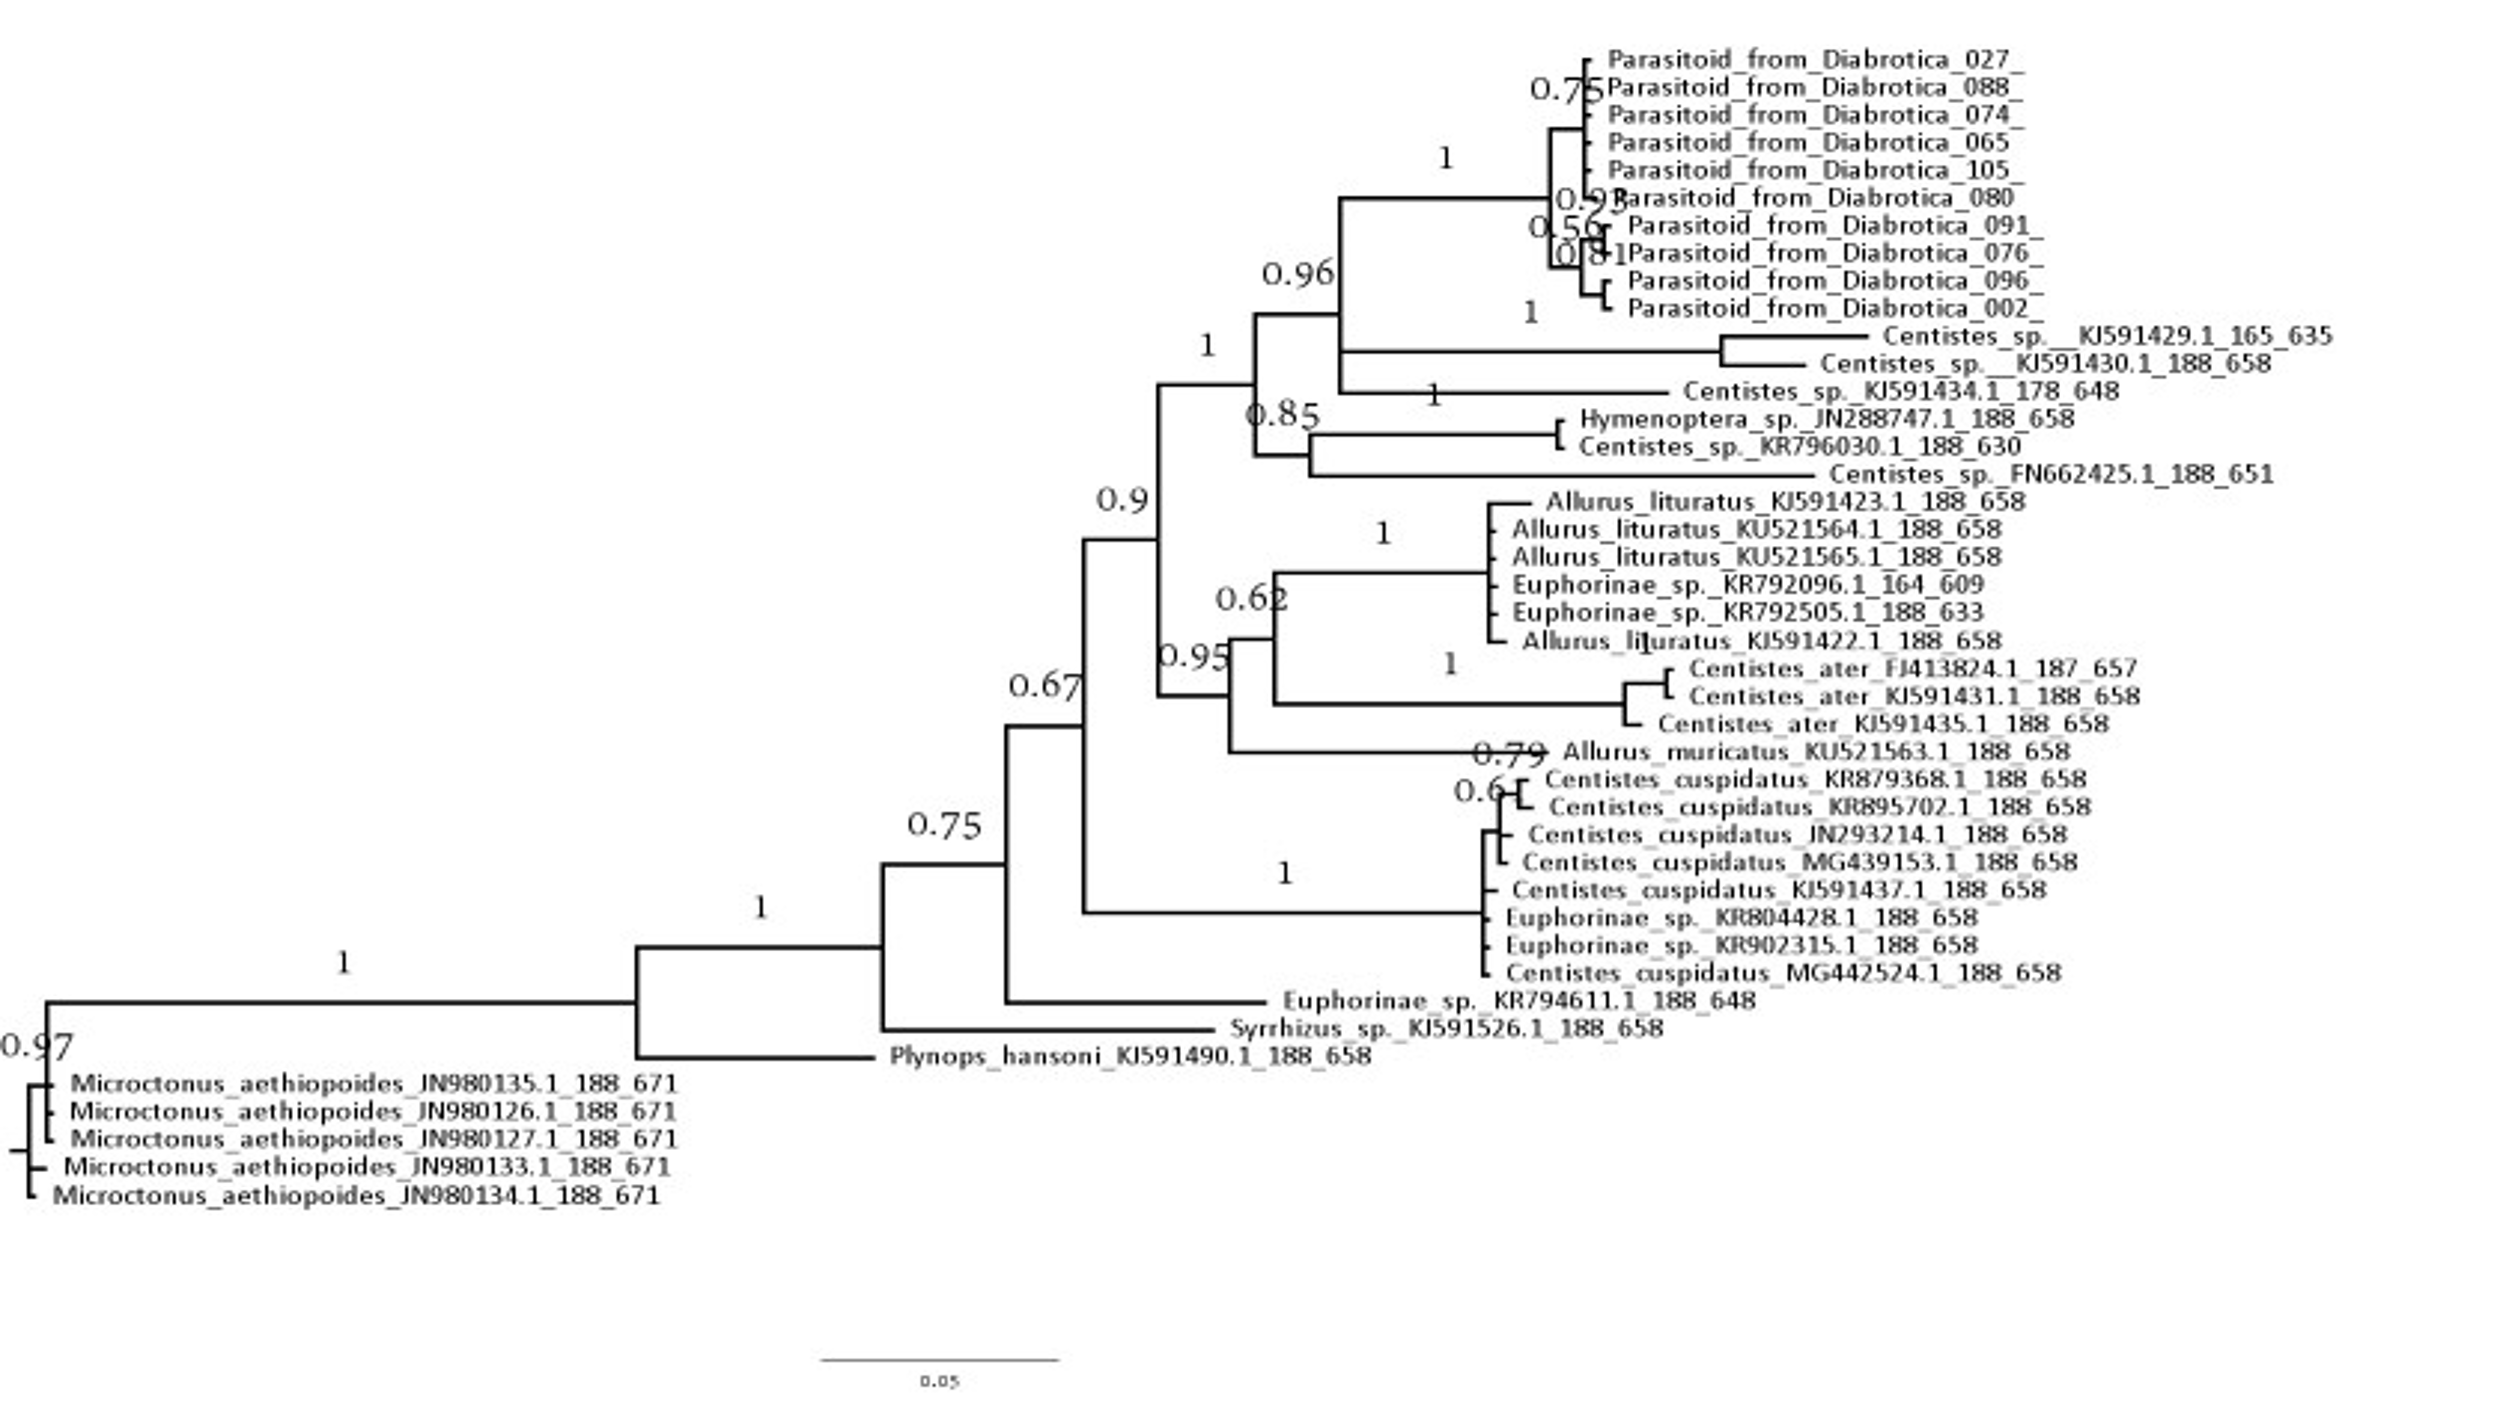


**Supplemental Figure S5.** Bayesian Inference using a JC69 substitution model with posterior probability used to assess branch support. Samples in this tree are taken from the orange clade in Supplemental **Fig S1**. GenBank accessions are denoted after the species names for sequences not generated in this study.


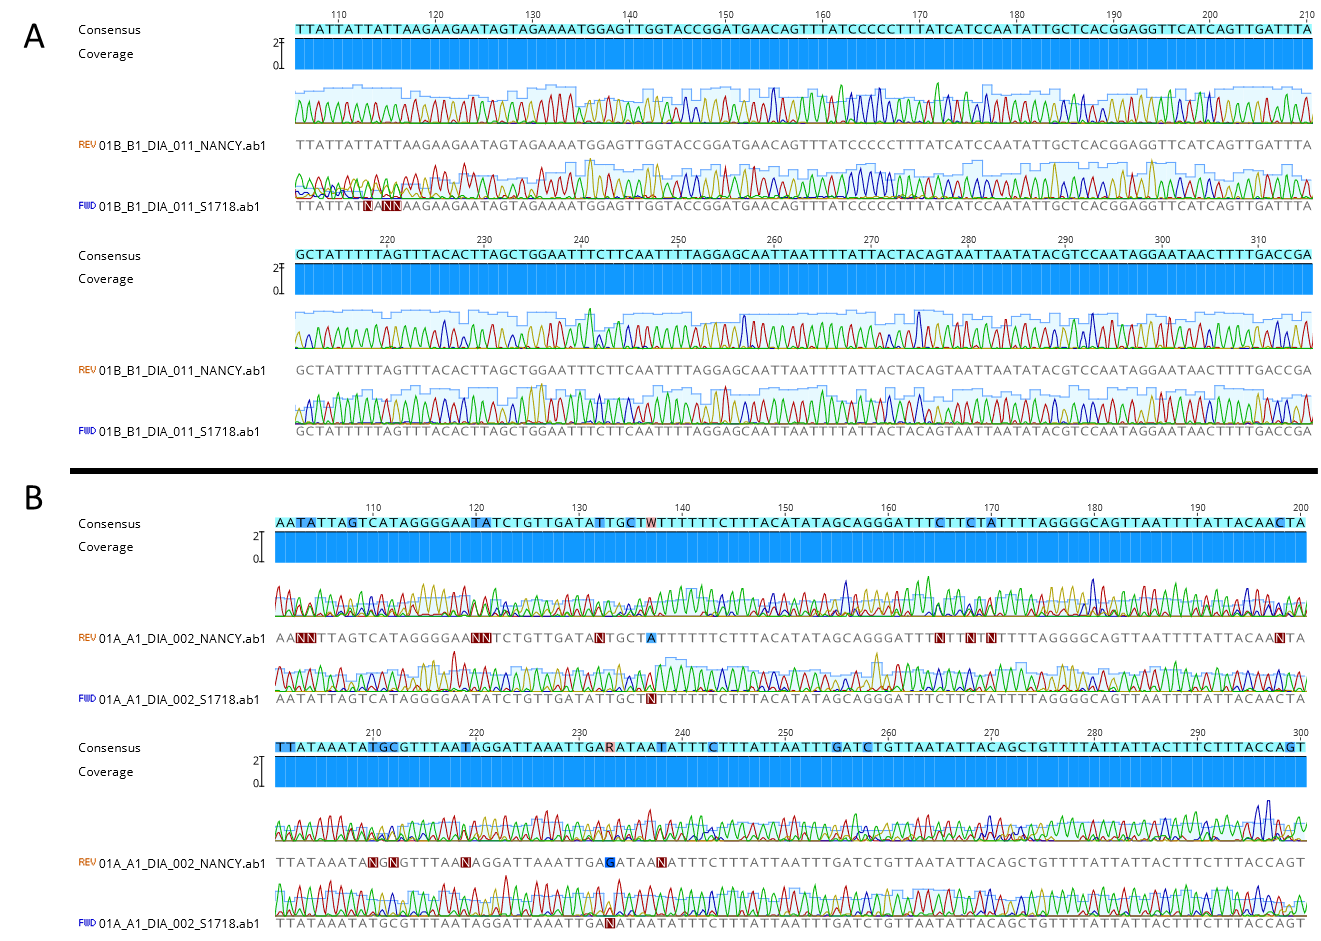


**Supplemental Figure S6**. Sanger electropherograms showing forward and reverse CO1 reads from **A** *Diabrotica undecimpunctata* (Diabro 011; Tembrock et al.) and **B** reads from the parasitoid *Centistes* sp. (PfD 002) with background reads from the host *D*. *undecimpunctata*. Electropherograms for both forward and reverse reads are shown contiged and the resultant consensus sequence above. Quality scores are superimposed behind peaks and base calls.

**Supplemental material 3.** Trimmed MAFFT alignment used in figures S2-S5.

>Plynops_hansoni_KJ591490.1:188-658 Plynops hansoni voucher AB067 cytochrome oxidase subunit I (COI) gene, partial cds; mitochondrial

AAGAAGGTTTGTAAATATTGGGGTTGGTACTGGTTGAACTGTTTATCCTCCTTTATCATTAAATGTTAGACATGGTGGTA

TGTCTGTGGATATATCTATTTTTTCTTTACATTTAGCTGGAATATCGTCAATTATAGGGGCTGTTAATTTTATTTCTACT

ATTTTAAATATGCGATTAATAGGTTTAAAATTGGATAATATTTCTTTAATAAGATGGTCTGTAATAATTACAGCTGTATT

ATTATTATTATCTCTTCCAGTTTTGGCAGGTGCTATTACTATATTATTAACAGATCGAAATTTAAATACTTCATTTTTTG

ATCCTGCAGGGGGTGG

>Centistes_sp._KJ591434.1:178-648 Centistes sp. 6 JMS-2015 voucher AB069 cytochrome oxidase subunit I (COI) gene, partial cds; mitochondrial

AAGTAGATTTGTTAATTTAGGAGTAGGGACGGGTTGAACTGTTTATCCTCCTCTTTCTTTAAATATTAGACATGGAGGTA

TATCTGTTGATATTGCAATTTTTTCTTTACATTTAGCAGGAATTTCTTCTATTTTAGGTGCGGTAAATTTTATTACAACT

ATTATAAATATGCGATTAATGGGGTTAAATTTAGATAATGTTTCTTTATTAATTTGGTCAGTTAATATTACAGCTGTTTT

GTTATTACTTTCTTTGCCTGTTTTAGCAGGTGCTATTACAATGTTATTAACTGATCGAAATTTGAATACTTCTTTTTTTG

ATCCTGCTGGAGGTGG

>Hymenoptera_sp._JN288747.1:188-658 Hymenoptera sp. BOLD:AAU8319 voucher BIOUG<CAN>:ASGLE2-0275 cytochrome oxidase subunit 1 (COI) gene, partial cds; mitochondrial

AAGTAGATTTGTTAATTTAGGGGCGGGTACGGGTTGAACTGTTTATCCCCCTCTTTCTTTAAGGGTAAGACATGGTGGTA

TATCTGTGGATATTGCTATTTTTTCTTTACATTTGGCTGGAATTTCATCTATTTTGGGTGCAGTAAATTTTATTACTACA

ATTATAAATATACGTTTATTTGGATTAAATTGAGATAATATTTCTTTATTTACTTGATCTGTAAATATTACTGCAATTTT

ATTATTATTATCTTTACCTGTTTTAGCTGGGGCTATTACTATATTATTAACTGATCGAAATTTAAATACTTCTTTTTTTG

ATCCTGCTGGTGGGGG

>Centistes_sp._KR796030.1:188-630 Centistes sp. BOLD-2016 voucher BIOUG04311-B08 cytochrome oxidase subunit 1 (COI) gene, partial cds; mitochondrial

AAGTAGATTTGTTAATTTAGGGGCGGGTACGGGTTGAACTGTTTATCCCCCTCTTTCTTTAAGGGTAAGACATGGTGGTA

TATCTGTGGATATTGCTATTTTTTCTTTACATTTGGCTGGAATTTCATCTATTTTGGGTGCAGTAAATTTTATTACTACA

ATTATAAATATACGTTTATTTGGATTAAATTGAGATAATATTTCTTTATTTACTTGATCTGTAAATATTACTGCAATTTT

ATTATTATTATCTTTACCTGTTTTAGCTGGGGCTATTACTATATTATTAACTGATCGAAATTTAAATACTTCTTTTTTTG

ATCCTGCTGGTGGGGG

>Parasitoid_from_Diabrotica_027_ 2 reads from 03A_A3_Dia_027 assembled using Geneious

AAGAAGATTTGTTAATATAGGGGCAGGTACTGGTTGAACAGTTTATCCTCCACTTTCTTTAAATATTAGTCATAGTGGAA

TATCTGTTGATATTGCTATTTTTTCTTTACATATAGCAGGGATCTCTTCCATTTTAGGGGCAGTTAATTTTATTACAACT

ATTATAAATATGCGTTTAATAGGATTAAATTGAGATAATATTTCTTTATTAATTTGATCTGTTAATATTACAGCTGTTTT

ATTATTACTTTCTTTACCAGTTTTAGCTGGGGCTATTACTATATTATTAACGGATCGAAATTTAAATACATCATTTTTTG

ATCCTGCTGGGGGGGG

>Parasitoid_from_Diabrotica_080 2 reads from 2 documents assembled using Geneious

AAGAAGATTTGTTAATATAGGGGCAGGTACTGGTTGAACAGTTTATCCTCCACTTTCTTTAAATATTAGTCATAGTGGAA

TATCTGTTGATATTGCTATTTTTTCTTTACATATAGCAGGGATTTCTTCCATTTTAGGGGCAGTTAATTTTATTACAACT

ATTATAAATATGCGTTTAATAGGATTAAATTGAGATAATATTTCTTTATTAATTTGATCTGTTAATATTACAGCTGTTTT

ATTATTACTTTCTTTACCAGTTTTAGCTGGGGCTATTACTATATTATTAACGGATCGAAATTTAAATACATCATTTTTTG

ATCCTGCTGGGGGGGG

>Parasitoid_from_Diabrotica_091_ 2 reads from 04B_B4_DIA_091 assembled using Geneious

AAGAAGATTTGTTAATATAGGGGCAGGTACTGGTTGAACAGTTTATCCCCCACTTTCTTTAAATATTAGTCATAGTGGAA

TATCTGTTGATATTGCTATTTTTTCTTTACATATAGCAGGGATCTCTTCTATTTTAGGGGCAGTTAATTTTATTACAACT

ATTATAAATATGCGTTTAATAGGATTAAATTGAGATAATATTTCTTTATTAATTTGATCTGTTAATATTACAGCTGTTTT

ATTATTACTTTCTTTACCAGTTTTAGCTGGAGCTATTACTATATTATTAACGGATCGAAATTTAAATACATCGTTTTTTG

ATCCTGCTGGGGGGGG

>Parasitoid_from_Diabrotica_088_ 2 reads from 03G_G3_DIA_088 assembled using Geneious

AAGAAGATTTGTTAATATAGGGGCAGGTACTGGTTGAACAGTTTATCCTCCACTTTCTTTAAATATTAGTCATAGTGGAA

TATCTGTTGATATTGCTATTTTTTCTTTACATATAGCAGGGATCTCTTCCATTTTAGGGGCAGTTAATTTTATTACAACT

ATTATAAATATGCGTTTAATAGGATTAAATTGAGATAATATTTCTTTATTAATTTGATCTGTTAATATTACAGCTGTTTT

ATTATTACTTTCTTTACCAGTTTTAGCTGGGGCTATTACTATATTATTAACGGATCGAAATTTAAATACATCATTTTTTG

ATCCTGCTGGGGGGGG

>Parasitoid_from_Diabrotica_096_ 2 reads from 04G_G4_DIA_096 assembled using Geneious

AAGAAGATTTGTTAATATAGGGGCAGGTACTGGTTGAACAGTTTATCCCCCACTTTCTTTAAATATTAGTCATAGGGGAA

TATCTGTTGATATTGCTATTTTTTCTTTACATATAGCAGGGATTTCTTCTATTTTAGGGGCAGTTAATTTTATTACAACT

ATTATAAATATGCGTTTAATAGGATTAAATTGAGATAATATTTCTTTATTAATTTGATCTGTTAATATTACAGCTGTTTT

ATTATTACTTTCTTTACCAGTTTTAGCTGGAGCTATTACTATATTATTAACGGATCGAAATTTAAATACATCATTTTTTG

ATCCTGCTGGGGGGGG

>Parasitoid_from_Diabrotica_074_ 2 reads from 02E_E2_DIA_074 assembled using Geneious

AAGAAGATTTGTTAATATAGGGGCAGGTACTGGTTGAACAGTTTATCCTCCACTTTCTTTAAATATTAGTCATAGTGGAA

TATCTGTTGATATTGCTATTTTTTCTTTACATATAGCAGGGATCTCTTCCATTTTAGGGGCAGTTAATTTTATTACAACT

ATTATAAATATGCGTTTAATAGGATTAAATTGAGATAATATTTCTTTATTAATTTGATCTGTTAATATTACAGCTGTTTT

ATTATTACTTTCTTTACCAGTTTTAGCTGGGGCTATTACTATATTATTAACGGATCGAAATTTAAATACATCATTTTTTG

ATCCTGCTGGGGGGGG

>Parasitoid_from_Diabrotica_076_ 2 reads from 02F_F2_DIA_076 assembled using Geneious

AAGAANATTTGTTAATATAGGGGCAGGTACTGGTTGAACAGTTTATCCCCCACTTTCTTTAAATATTAGTCATAGTGGAA

TATCTGTTGATATTGCTATTTTTTCTTTACATATAGCAGGGATCTCTTCTATTTTAGGGGCAGTTAATTTTATTACAACT

ATTATAAATATGCGTTTAATAGGATTAAATTGARATAATATTTCTTTATTAATTTGATCTGTTAATATTACAGCTGTTTT

ATTATTACTTTCTTTACCAGTTTTAGCTGGAGCTATTACTATATTATTAACGGATCGAAATTTAAATACATCGTTTTTTG

ATCCTGCTGGGGGGGG

>Parasitoid_from_Diabrotica_065 2 reads from 2 documents assembled using Geneious

AAGAAGATTTGTTAATATAGGGGCAGGTACTGGTTGAACAGTTTATCCTCCACTTTCTTTAAATATTAGTCATAGTGGAA

TATCTGTTGATATTGCTATTTTTTCTTTACATATAGCAGGGATCTCTTCCATTTTAGGGGCAGTTAATTTTATTACAACT

ATTATAAATATGCGTTTAATAGGATTAAATTGAGATAATATTTCTTTATTAATTTGATCTGTTAATATTACAGCTGTTTT

ATTATTACTTTCTTTACCAGTTTTAGCTGGGGCTATTACTATATTATTAACGGATCGAAATTTAAATACATCATTTTTTG

ATCCTGCTGGGGGGGG

>Parasitoid_from_Diabrotica_002_ 2 reads from 01A_A1_DIA_002 assembled using Geneious

AARAANATTTGTTAATATAGGGGCAGGTACTGGTTGAACAGTTTATCCCCCACTTTCTTTAAATATTAGTCATAGGGGAA

TATCTGTTGATATTGCTWTTTTTTCTTTACATATAGCAGGGATTTCTTCTATTTTAGGGGCAGTTAATTTTATTACAACT

ATTATAAATATGCGTTTAATAGGATTAAATTGARATAATATTTCTTTATTAATTTGATCTGTTAATATTACAGCTGTTTT

ATTATTACTTTCTTTACCAGTTTTAGCTGGAGCTATTACTATATTATTAACGGATCGAAATTTAAATACATCATTTTTTG

ATCCTGCTGGGGGGGG

>Parasitoid_from_Diabrotica_105_ 2 reads from 05D_D5_DIA_105 assembled using Geneious

AAGAAGATTTGTTAATATAGGGGCAGGTACTGGTTGAACAGTTTATCCTCCACTTTCTTTAAATATTAGTCATAGTGGAA

TATCTGTTGATATTGCTATTTTTTCTTTACATATAGCAGGGATCTCTTCCATTTTAGGGGCAGTTAATTTTATTACAACT

ATTATAAATATGCGTTTAATAGGATTAAATTGAGATAATATTTCTTTATTAATTTGATCTGTTAATATTACAGCTGTTTT

ATTATTACTTTCTTTACCAGTTTTAGCTGGGGCTATTACTATATTATTAACGGATCGAAATTTAAATACATCATTTTTTG

ATCCTGCTGGGGGGGG

>Allurus_muricatus_KU521563.1:188-658 Allurus muricatus voucher JS10_00405 cytochrome oxidase subunit I (COI) gene, partial cds; mitochondrial

AAGAAGATTTTTAAATTTAGGGGCGGGGACTGGTTGGACTGTTTATCCTCCTCTTTCTTTAAATGTGAGTCATGGTGGTA

TATCTGTTGATATTGCTATTTTTTCCTTACATTTAGCAGGTATTTCTTCAATTTTAGGTGCTGTTAATTTTATTTCTACT

ATTATAAATATACGATTAATGGGATTAAAATGGGATAATTTATCTTTATTAAGGTGATCAGTTAATATTACAGCTGTTTT

ATTATTGTTATCACTTCCTGTTCTTGCTGGAGCTATTACCATGTTATTGACTGATCGAAATTTAAATACTTCTTTTTTTG

ATCCTGCTGGTGGGGG

>Allurus_lituratus_KJ591423.1:188-658 Allurus lituratus voucher JS10_00409 cytochrome oxidase subunit I (COI) gene, partial cds; mitochondrial

AAGGAGGTTTTTAAATTTAGGGGTAGGAACTGGTTGAACTGTTTATCCCCCTCTTTCTTTAAATGTAAGGCATGGGGGTA

TATCTGTAGATATTGCTATTTTTTCTTTACATTTAGCAGGAATTTCTTCTATTTTAGGGGCTGTAAATTTTATTTCCACT

ATTATAAATATACGATTGGAGGGTTTAAAGTGGGATAATATTTCTTTATTAAGATGATCTGTTAATATTACGGCTGTTTT

ATTATTATTATCTTTACCTGTTTTAGCGGGTGCTATTACTATGCTATTGACTGATCGAAATTTAAATACTTCTTTTTTTG

ATCCATCTGGGGGGGG

>Allurus_lituratus_KU521564.1:188-658 Allurus lituratus voucher JS10_00406 cytochrome oxidase subunit I (COI) gene, partial cds; mitochondrial

AAGGAGGTTTTTAAATTTAGGGGCAGGAACTGGTTGAACTGTTTATCCCCCTCTTTCTTTAAATGTAAGGCATGGGGGTA

TATCTGTAGATATTGCTATTTTTTCTTTACATTTAGCTGGAATTTCTTCTATTTTAGGGGCTGTAAATTTTATTTCCACT

ATTATAAATATACGATTGGAGGGTTTAAAGTGGGATAATATTTCTTTATTAAGATGATCTGTTAATATTACGGCTGTTTT

ATTATTATTATCTTTACCTGTTTTAGCAGGTGCTATTACTATGCTATTGACTGATCGAAATTTAAATACTTCTTTTTTTG

ATCCATCTGGGGGGGG

>Allurus_lituratus_KU521565.1:188-658 Allurus lituratus voucher JS10_00408 cytochrome oxidase subunit I (COI) gene, partial cds; mitochondrial

AAGGAGGTTTTTAAATTTAGGGGCAGGAACTGGTTGAACTGTTTATCCCCCTCTTTCTTTAAATGTAAGGCATGGGGGTA

TATCTGTAGATATTGCTATTTTTTCTTTACATTTAGCTGGAATTTCTTCTATTTTAGGGGCTGTAAATTTTATTTCCACT

ATTATAAATATACGATTGGAGGGTTTAAAGTGGGATAATATTTCTTTATTAAGATGATCTGTTAATATTACGGCTGTTTT

ATTATTATTATCTTTACCTGTTTTAGCAGGTGCTATTACTATGCTATTGACTGATCGAAATTTAAATACTTCTTTTTTTG

ATCCATCTGGGGGGGG

>Allurus_lituratus_KJ591422.1:188-658 Allurus lituratus voucher JS10_00506 cytochrome oxidase subunit I (COI) gene, partial cds; mitochondrial

AAGGAGGTTTTTAAATTTAGGGGCAGGAACTGGTTGAACTGTTTATCCCCCTCTTTCTTTAAATGTAAGGCATGGGGGTA

TATCTGTAGATATTGCTATTTTTTCTTTACATTTAGCTGGAATTTCTTCTATTTTAGGGGCTGTAAATTTTATTTCCACT

ATTATAAATATACGATTGGAGGGTTTAAAGTGGGATAATATTTCTTTATTAAGATGATCTGTTAATATTACGGCTGTTTT

ATTACTATTATCTTTACCTGTTTTAGCAGGTGCTATTACTATGCTATTGACTGATCGAAATTTAAATACTTCTTTTTTTG

ATCCATCTGGGGGGGG

>Euphorinae_sp._KR792096.1:164-609 Euphorinae sp. BOLD-2016 voucher BIOUG01330-B04 cytochrome oxidase subunit 1 (COI) gene, partial cds; mitochondrial

AAGGAGGTTTTTAAATTTAGGGGCAGGAACTGGTTGAACTGTTTATCCCCCTCTTTCTTTAAATGTAAGGCATGGGGGTA

TATCTGTAGATATTGCTATTTTTTCTTTACATTTAGCTGGAATTTCTTCTATTTTAGGGGCTGTAAATTTTATTTCCACT

ATTATAAATATACGATTGGAGGGTTTAAAGTGGGATAATATTTCTTTATTAAGATGATCTGTTAATATTACGGCTGTTTT

ATTATTATTATCTTTACCTGTTTTAGCAGGTGCTATTACTATGCTATTGACTGATCGAAATTTAAATACTTCTTTTTTTG

ATCCATCTGGGGGGGG

>Euphorinae_sp._KR792505.1:188-633 Euphorinae sp. BOLD-2016 voucher BIOUG01327-D11 cytochrome oxidase subunit 1 (COI) gene, partial cds; mitochondrial

AAGGAGGTTTTTAAATTTAGGGGCAGGAACTGGTTGAACTGTTTATCCCCCTCTTTCTTTAAATGTAAGGCATGGGGGTA

TATCTGTAGATATTGCTATTTTTTCTTTACATTTAGCTGGAATTTCTTCTATTTTAGGGGCTGTAAATTTTATTTCCACT

ATTATAAATATACGATTGGAGGGTTTAAAGTGGGATAATATTTCTTTATTAAGATGATCTGTTAATATTACGGCTGTTTT

ATTATTATTATCTTTACCTGTTTTAGCAGGTGCTATTACTATGCTATTGACTGATCGAAATTTAAATACTTCTTTTTTTG

ATCCATCTGGGGGGGG

>Centistes_sp.__KJ591429.1:165-635 Centistes sp. JS10_00259 cytochrome oxidase subunit I (COI) gene, partial cds; mitochondrial

AAGAAGTTTTGTTAATGTTGGAGTAGGTACTGGATGAACAGTTTATCCCCCATTATCTTTAAATATGAGACATGGGGGTA

TATCAGTGGATATTGCAATTTTTTCTTTACATTTGGCTGGTGTTTCTTCAATTTTAGGGGCGATAAATTTTATTACTACT

ATTTTAAATATGCGGTTATGTGGATTAGATTGGGATAATATTTCTTTGTTAGCTTGATCTGTTAATATTACTGCTGTATT

ATTACTTCTTTCATTGCCTGTTTTAGCTGGGGCTATTACTATGCTATTAACTGATCGTAATTTGAATACTTCTTTTTTTG

ATCCTGCTGGGGGGGG

>Centistes_sp.__KJ591430.1:188-658 Centistes sp. JS10_00260 cytochrome oxidase subunit I (COI) gene, partial cds; mitochondrial

AAGAAGTTTTATTAATGTTGGAGCAGGTACTGGATGAACAGTTTACCCCCCACTATCTTTGAATATAAGACATGGGGGTA

TATCAGTGGATATTGCAATTTTTTCTTTACATTTGGCTGGTATTTCTTCAATTTTAGGGGCGGTAAATTTTATTACCACT

ATTTTAAATATGCGGTTGTATGGTTTAAATTGGGATAATATTTCTTTATTAGCTTGATCTGTTAATATTACTGCTGTATT

ATTACTTCTTTCATTACCTGTTTTAGCTGGGGCTATTACTATGTTATTAACTGATCGGAATTTAAATACTTCTTTTTTTG

ATCCTGCTGGGGGGGG

>Centistes_ater_KJ591435.1:188-658 Centistes ater voucher JS10_00503 cytochrome oxidase subunit I (COI) gene, partial cds; mitochondrial

GAGAAGATTTTTAAATTTAGGTGCGGGAACAGGGTGAACTGTTTATCCTCCTCTTTCTTTGAATGTTAGTCATGGTGGTA

TATCTGTAGATATTGCTATTTTTTCACTTCATTTGGCTGGGATTTCTTCTATTTTAGGGGCTGTTAATTTTATTTCTACA

ATTATGAATATGCGGTTGGTTGGATTAAAGTGGGATAATATTTCTTTATTAAGATGGTCTGTTAATATTACTGCTGTATT

GTTATTATTATCTTTACCGGTATTAGCTGGGGCTATTACTATGTTATTAACTGATCGTAATTTGAATACTTCTTTTTTTG

ATCCTGCAGGGGGGGG

>Centistes_ater_FJ413824.1:187-657 Centistes ater voucher BIOUG<CAN>:06-PROBE-4301 cytochrome oxidase subunit 1 (COI) gene, partial cds; mitochondrial

GAGAAGATTTTTAAATTTAGGGGCGGGAACAGGGTGAACTGTTTATCCTCCCCTTTCTTTGAATGTTAGTCATGGTGGTA

TATCTGTAGATATTGCTATTTTTTCACTTCATTTGGCTGGGATTTCTTCTATTTTAGGGGCTGTTAATTTTATTTCTACA

ATTATGAATATGCGGTTGGTTGGATTAAAGTGGGATAATATTTCTTTATTAAGATGGTCTGTTAATATTACTGCTGTATT

GTTATTATTATCTTTGCCGGTATTAGCTGGGGCTATTACTATGTTATTAACTGACCGTAATTTGAATACTTCTTTTTTTG

ATCCTGCAGGGGGGGG

>Centistes_ater_KJ591431.1:188-658 Centistes ater voucher JS10_00419 cytochrome oxidase subunit I (COI) gene, partial cds; mitochondrial

GAGAAGATTTTTAAATTTAGGGGCGGGAACAGGGTGAACTGTTTATCCTCCCCTTTCTTTGAATGTTAGTCATGGTGGTA

TATCTGTAGATATTGCTATTTTTTCACTTCATTTGGCTGGGATTTCTTCTATTTTAGGGGCTGTTAATTTTATTTCTACA

ATTATGAATATGCGGTTGGTTGGATTAAAGTGGGATAATATTTCTTTATTAAGATGGTCTGTTAATATTACTGCTGTATT

GTTATTATTATCTTTGCCGGTATTAGCTGGGGCTATTACTATGTTATTAACTGACCGTAATTTGAATACTTCTTTTTTTG

ATCCTGCAGGGGGGGG

>Euphorinae_sp._KR794611.1:188-648 Euphorinae sp. BOLD-2016 voucher BIOUG06873-F01 cytochrome oxidase subunit 1 (COI) gene, partial cds; mitochondrial

AAGAAGATTTGTTAATCTGGGGGCGGGGACAGGGTGAACTGTTTATCCTCCTTTGTCTTTAAATGTTAGTCATGGGGGTA

TGTCTGTAGATATTGCAATTTTTTCTTTACATTTAGCAGGTATTTCTTCTATTTTGGGAGCTGTAAATTTTATTTCTACT

ATTATGAATATACGATTATTGGGGTTGAATTGAGATAATATTTCTTTAATAAGATGATCTGTAAATATTACAGCTGTTTT

ATTATTATTATCTCTTCCTGTTTTGGCGGGGGCAATTACTATATTGTTAACTGATCGTAATTTAAATACTTCTTTTTTTG

ATCCAGCGGGGGGGGG

>Centistes_cuspidatus_KJ591437.1:188-658 Centistes cuspidatus voucher JS10_00505 cytochrome oxidase subunit I (COI) gene, partial cds; mitochondrial

AAGAAGATTTGTTAATTTAGGGACAGGGACTGGTTGGACTGTTTACCCACCTCTATCATTAAATATTAGTCATGGAGGTA

TGTCGGTAGATATTGCAATTTTTTCTTTGCATTTAGCTGGTATTTCTTCTATTTTAGGGGCTGTAAATTTTATTTCTACT

ATTATAAATATACGATTATTAGGTTTAGGTTGAGATAATATTACTCTTTTAAGGTGATCTGTAAATATTACAGCTGTTTT

GTTATTATTATCATTACCTGTATTAGCGGGGGCTATTACTATATTATTGACAGATCGAAATTTAAATACTTCATTCTTTG

ACCCGGCTGGAGGGGG

>Euphorinae_sp._KR804428.1:188-658 Euphorinae sp. BOLD-2016 voucher BIOUG01037-B03 cytochrome oxidase subunit 1 (COI) gene, partial cds; mitochondrial

AAGAAGATTTGTTAATTTAGGGACAGGGACTGGTTGGACTGTTTACCCACCTCTATCATTAAATATTAGTCATGGAGGCA

TGTCGGTAGATATTGCAATTTTTTCTTTGCATTTAGCTGGTATTTCTTCTATTTTAGGGGCTGTAAATTTTATTTCTACT

ATTATAAATATACGATTATTAGGTTTAGGTTGAGATAATATTACTCTTTTAAGGTGATCTGTAAATATTACAGCTGTTTT

GTTATTATTATCATTACCTGTATTAGCGGGGGCTATTACTATATTATTGACAGATCGAAATTTAAATACTTCATTCTTTG

ACCCGGCTGGAGGGGG

>Euphorinae_sp._KR902315.1:188-658 Euphorinae sp. BOLD-2016 voucher BIOUG01496-C05 cytochrome oxidase subunit 1 (COI) gene, partial cds; mitochondrial

AAGAAGATTTGTTAATTTAGGGACAGGGACTGGTTGGACTGTTTACCCACCTCTATCATTAAATATTAGTCATGGAGGCA

TGTCGGTAGATATTGCAATTTTTTCTTTGCATTTAGCTGGTATTTCTTCTATTTTAGGGGCTGTAAATTTTATTTCTACT

ATTATAAATATACGATTATTAGGTTTAGGTTGAGATAATATTACTCTTTTAAGGTGATCTGTAAATATTACAGCTGTTTT

GTTATTATTATCATTACCTGTATTAGCGGGGGCTATTACTATATTATTGACAGATCGAAATTTAAATACTTCATTCTTTG

ACCCGGCTGGAGGGGG

>Centistes_cuspidatus_MG442524.1:188-658 Centistes cuspidatus voucher BARS_2016_43_142 cytochrome oxidase subunit 1 (COI) gene, partial cds; mitochondrial

AAGAAGATTTGTTAATTTAGGGACAGGGACTGGTTGGACTGTTTACCCACCTCTATCATTAAATATTAGTCATGGAGGCA

TGTCGGTAGATATTGCAATTTTTTCTTTGCATTTAGCTGGTATTTCTTCTATTTTAGGGGCTGTAAATTTTATTTCTACT

ATTATAAATATACGATTATTAGGTTTAGGTTGAGATAATATTACTCTTTTAAGGTGATCTGTAAATATTACAGCTGTTTT

GTTATTATTATCATTACCTGTATTAGCGGGGGCTATTACTATATTATTGACAGATCGAAATTTAAATACTTCATTCTTTG

ACCCGGCTGGAGGGGG

>Centistes_cuspidatus_JN293214.1:188-658 Centistes cuspidatus voucher BIOUG<CAN>:10BBCHY-2247 cytochrome oxidase subunit 1 (COI) gene, partial cds; mitochondrial

AAGAAGATTTGTTAATTTAGGGACAGGGACTGGTTGGACTGTTTACCCACCTTTATCATTAAATATTAGTCATGGGGGCA

TGTCGGTAGATATTGCAATTTTTTCTTTGCATTTAGCTGGTATTTCTTCTATTTTAGGGGCTGTAAATTTTATTTCTACT

ATTATAAATATACGATTATTAGGTTTAGGTTGAGATAATATTACTCTTTTAAGGTGATCTGTAAATATTACAGCTGTTTT

GTTATTATTATCATTACCTGTATTAGCGGGGGCTATTACTATATTATTGACAGATCGAAATTTAAATACTTCATTCTTTG

ACCCGGCTGGAGGGGG

>Centistes_cuspidatus_MG439153.1:188-658 Centistes cuspidatus voucher BARS_2016_42_161 cytochrome oxidase subunit 1 (COI) gene, partial cds; mitochondrial

AAGAAGATTTGTTAATTTAGGGACAGGGACTGGTTGGACTGTTTACCCACCTTTATCATTAAATATTAGTCATGGAGGCA

TGTCGGTAGATATTGCAATTTTTTCTTTGCATTTAGCTGGTATTTCTTCTATTTTAGGGGCTGTAAATTTTATTTCTACT

ATTATAAATATACGATTATTAGGTTTAGGTTGAGATAATATTACTCTTTTAAGGTGATCTGTAAATATTACAGCTGTTTT

GTTATTATTATCATTACCTGTATTAGCGGGGGCTATTACTATATTATTGACAGATCGAAATTTAAATACTTCATTCTTTG

ACCCGGCTGGAGGGGG

>Centistes_cuspidatus_KR879368.1:188-658 Centistes cuspidatus voucher BIOUG06655-E10 cytochrome oxidase subunit 1 (COI) gene, partial cds; mitochondrial

AAGAAGATTTGTTAATTTAGGGACAGGGACTGGTTGGACTGTTTACCCACCTTTATCATTAAATATTAGTCATGGAGGCA

TGTCGGTAGATATTGCAATTTTTTCTTTGCATTTAGCTGGTATTTCTTCTATTTTAGGGGCTGTAAATTTTATTTCTACT

ATTATAAATATACGATTATTAGGTTTAGGTTGAGATAATATTACTCTTTTAAGGTGATCTGTAAATATTACAGCTGTTTT

GTTATTATTATCATTACCTGTATTAGCGGGGGCTATTACTATATTATTGACAGATCGAAATTTAAATCCTTCATTCTTTG

ACCCGGCTGGAGGGGG

>Centistes_cuspidatus_KR895702.1:188-658 Centistes cuspidatus voucher BIOUG06655-C02 cytochrome oxidase subunit 1 (COI) gene, partial cds; mitochondrial

AAGAAGATTTGTTAATTTAGGGACAGGGACTGGTTGGACTGTTTACCCACCTTTATCATTAAATATTAGTCATGGGGGCA

TGTCGGTAGATATTGCAATTTTTTCTTTGCATTTAGCTGGTATTTCTTCTATTTTAGGGGCTGTAAATTTTATTTCTACT

ATTATAAATATACGATTATTAGGTTTAGGTTGAGATAATATTACTCTTTTAAGGTGATCTGTAAATATTACAGCTGTTTT

GTTATTATTATCATTACCTGTATTAGCGGGGGCTATTACTATATTATTGACAGATCGAAATTTAAATCCTTCATTCTTTG

ACCCGGCTGGAGGGGG

>Syrrhizus_sp._KJ591526.1:188-658 Syrrhizus sp. JS10_00432 cytochrome oxidase subunit I (COI) gene, partial cds; mitochondrial

GGGGAGATTTGTTAATTTGGGGGCAGGTACTGGTTGAACTGTTTATCCTCCATTGTCATTGAATGTTAGACATAGTGGTA

TGTCTGTTGATATTACTATTTTTTCTTTACACATAGCTGGTATTTCTTCAATTTTAGGGGCTGTGAATTTTATTTCTACA

ATTATAAATATGCGATTATTGGGTTTGAAAGGAGATAATATTTCTTTATTAAGATGATCTGTTAATATTACTGCTGTATT

ATTATTATTGTCTTTGCCAGTATTGGCTGGGGCAATTACTATGTTATTAACTGATCGTAATTTAAATACTTCGTTTTTTG

ATCCCGCAGGGGGGGG

>Centistes_sp._FN662425.1:188-651 Centistes sp. NHM670818 mitochondrial partial COI gene for cytochrome oxidase subunit I, specimen voucher NHM670818

AAGAAGGTTTGTAAATTTGGGGGCAGGTACTGGTTGAACTGTGTATCCCCCCTTATCCTTGAATGTGAGACATGGAGGAA

TATCTGTAGATATTGCTATTTTTTCTTTACATATGGCTGGTATTTCTTCTATTTTGGGGGCAGTTAATTTTATTAGTACT

ATTATAAATATACGTTTAAGTGGGTTAAATTGAGATAATATTACTTTGTTAATTTGATCTGTTAATATTACAGTAGTTTT

ATTGTTATTGTCATTGCCTGTATTAGCAGGAGCTATTACTATGTTATTGACTGATCGTAATTTGAATACTTCTTTTTTTG

ACCCAGCAGGGGGAGG

>Microctonus_aethiopoides_JN980135.1:188-671 Microctonus aethiopoides isolate 10130 cytochrome c oxidase subunit 1 (COI) gene, partial cds; mitochondrial

TAGAAGATTTATAAATATTGGGGTAGGGACTGGTTGGACAGTTTATCCTCCTTTGTCTTTAAATGTTAGTCATAGTGGAA

TATCTGTTGATATAAGAATTTTTTCCTTACATCTGGCAGGAATTTCTTCTATTATAGGGGCAATTAATTTTATCTCTACT

ATTATAAATATACGTTTAATAGGTTTAATAATAAATAATATTTCTTTATTTGTATGATCAGTATTAATTACGGCTGTATT

ATTATTATTATCTTTACCAGTATTAGCAGGTGCAATTACTATACTATTAAGAGATCGTAATTTAAATACAACGTTCTTTG

ATCCAGCAGGGGGGGG

>Microctonus_aethiopoides_JN980126.1:188-671 Microctonus aethiopoides isolate 10117 cytochrome c oxidase subunit 1 (COI) gene, partial cds; mitochondrial

TAGAAGATTTATAAATATTGGGGTAGGGACTGGTTGGACAGTTTATCCTCCTTTGTCTTTAAATGTTAGTCATAGTGGAA

TATCTGTTGATATAAGAATTTTTTCCTTACATCTGGCAGGAATTTCTTCTATTATAGGGGCAATTAATTTTATCTCTACT

ATTATAAATATACGTTTAATAGGTTTAATAATAAATAATATTTCTTTATTTGTATGATCAGTATTAATTACGGCTGTATT

ATTATTATTATCTTTACCAGTATTAGCAGGTGCAATTACTATACTATTAAGAGATCGTAATTTAAATACAACGTTCTTTG

ATCCAGCAGGGGGGGG

>Microctonus_aethiopoides_JN980127.1:188-671 Microctonus aethiopoides isolate 10119 cytochrome c oxidase subunit 1 (COI) gene, partial cds; mitochondrial

TAGAAGATTTATAAATATTGGGGTAGGGACTGGTTGGACAGTTTATCCTCCTTTGTCTTTAAATGTTAGTCATAGTGGAA

TATCTGTTGATATAAGAATTTTTTCCTTACATCTGGCAGGAATTTCTTCTATTATAGGGGCAATTAATTTTATCTCTACT

ATTATAAATATACGTTTAATAGGTTTAATAATAAATAATATTTCTTTATTTGTATGATCAGTATTAATTACGGCTGTATT

ATTATTATTATCTTTACCAGTATTAGCAGGTGCAATTACTATACTATTAAGAGATCGTAATTTAAATACAACGTTCTTTG

ATCCAGCAGGGGGGGG

>Microctonus_aethiopoides_JN980133.1:188-671 Microctonus aethiopoides isolate 10127 cytochrome c oxidase subunit 1 (COI) gene, partial cds; mitochondrial

TAGAAGATTTATAAATATTGGGGTAGGGACTGGTTGGACAGTTTATCCTCCTTTGTCTTTAAATGTTAGTCATAGTGGGA

TATCTGTTGATATAAGAATTTTTTCCTTACATCTGGCAGGAATTTCTTCTATTATAGGGGCAATTAATTTTATCTCTACT

ATTATAAATATACGTTTAATAGGTTTAATAATAAATAATATTTCTTTATTTGTATGATCAGTATTAATTACGGCTGTATT

ACTATTATTATCTTTACCAGTATTAGCAGGTGCAATTACTATACTATTAAGAGATCGTAATTTAAATACAACGTTCTTTG

ATCCAGCAGGGGGGGG

>Microctonus_aethiopoides_JN980134.1:188-671 Microctonus aethiopoides isolate 10129 cytochrome c oxidase subunit 1 (COI) gene, partial cds; mitochondrial

TAGAAGATTTATAAATATTGGGGTAGGGACTGGTTGGACAGTTTATCCTCCTTTGTCTTTAAATGTTAGTCATAGTGGAA

TATCTGTTGATATAAGAATTTTTTCCTTACATCTGGCAGGAATTTCTTCTATTATAGGGGCAATTAATTTTATCTCTACT

ATTATAAATATACGTTTAATAGGTTTAATAATAAATAATATTTCTTTATTTGTATGATCAGTATTAATTACGGCTGTATT

ACTATTATTATCTTTACCAGTATTAGCAGGTGCAATTACTATACTATTAAGAGATCGTAATTTAAATACAACGTTCTTTG

ATCCAGCAGGGGGGGG
